# Supplementary material for: Feasibility of a blended group treatment (bGT) for major depression: uncontrolled interventional study in a university setting
Source: PubMed Central journal article supplement — BMJ Open. 2018 Mar 12;8(3):e018412. doi: 10.1136/bmjopen-2017-018412 (PMC5857649; doi:10.1136/bmjopen-2017-018412), 2018-03-12
Supplement: bmjopen-2017-018412.draft_revisions.pdf [file bmjopen-2017-018412.draft_revisions.pdf]

# BMJ Open

BMJ Open is committed to open peer review. As part of this commitment we make the peer review history of every article we publish publicly available.

When an article is published we post the peer reviewers' comments and the authors' responses online. We also post the versions of the paper that were used during peer review. These are the versions that the peer review comments apply to.

The versions of the paper that follow are the versions that were submitted during the peer review process. They are not the versions of record or the final published versions. They should not be cited or distributed as the published version of this manuscript.

BMJ Open is an open access journal and the full, final, typeset and author-corrected version of record of the manuscript is available on our site with no access controls, subscription charges or pay-per-view fees (<http://bmjopen.bmj.com>).

If you have any questions on BMJ Open's open peer review process please email [editorial.bmjopen@bmj.com](mailto:editorial.bmjopen@bmj.com)

# BMJ Open

## **A Blended Group Intervention for Depression: Results from an Uncontrolled Clinical Study on a Computer- and Multimedia Supported Resource-Oriented Psychoeducational Group Intervention**

|                               |                                                                                                                                        |
|-------------------------------|----------------------------------------------------------------------------------------------------------------------------------------|
| Journal:                      | <i>BMJ Open</i>                                                                                                                        |
| Manuscript ID                 | bmjopen-2017-018412                                                                                                                    |
| Article Type:                 | Research                                                                                                                               |
| Date Submitted by the Author: | 18-Jul-2017                                                                                                                            |
| Complete List of Authors:     | Schuster, Raphael; Universität Salzburg<br>Fichtenbauer, Isabelle<br>Sparr, Verena Maria<br>Berger, Thomas;<br>Laireiter, Anton-Rupert |
| Keywords:                     | Blended Therapy, Blended Group Therapy, Online Interventions, Group Therapy, Depression                                                |
|                               |                                                                                                                                        |

SCHOLARONE™  
Manuscripts

Peer Review Only

1  
2  
3 A Blended Group Intervention for Depression: Results from an Uncontrolled Clinical Study on a Com-  
4 puter- and Multimedia Supported Resource-Oriented Group Intervention  
5

6 Raphael Schuster<sup>1</sup>, Isabelle Fichtenbauer<sup>3</sup>, Verena Sparr<sup>3</sup>, Thomas Berger<sup>2</sup>, Anton-Rupert Laireiter<sup>1,3</sup>  
7  
8  
9

10  
11 1. Department of psychology, University of Salzburg  
12

13 2. Department of clinical psychology and psychotherapy, University of Bern  
14

15 3. Faculty of psychology, University of Vienna  
16  
17

18  
19  
20  
21 \*Corresponding author:  
22

23 Raphael Schuster, MSc.

24 Fachbereich Psychologie, Universität Salzburg

25 Hellbrunnerstraße 34, 5020 Salzburg, Österreich

26  
27 raphael.schuster@sbg.ac.at  
28  
29  
30  
31  
32  
33  
34  
35  
36  
37  
38  
39  
40  
41  
42  
43  
44  
45  
46  
47  
48  
49  
50  
51  
52  
53  
54  
55  
56  
57  
58  
59  
60

## Abstract

**Objective:** This study investigated the acceptability and effectivity of a novel blended (face-to-face and computer-based) group intervention for the low-threshold treatment of depression and comorbid anxiety.

**Design:** Patient-centred uncontrolled clinical trial.

**Setting:** University outpatient setting in a general community sample. A multi-modal recruitment strategy (public health centres and public areas) was applied.

**Participants:** Based on independent interviews, 26 participants, diagnosed with major depressive disorder (81 % female; 23 % comorbidity > 1, 23 % comorbidity > 2), entered treatment. One patient dropped out before treatment had ended.

**Intervention:** Positive and resource-oriented psychology principles served as theoretical basement for the low-threshold intervention. The blended format included face-to-face therapy, complemented with multimedia presentations and a platform featuring videos, online work sheets, an unguided group-chat, as well as remote therapist-patient communication.

**Main outcome measures:** The Center for Epidemiological Studies-Depression scale (CES-D) and the twelve-item General Health Questionnaire (GHQ-12).

**Results:** Large to very large within-group effect sizes were found on self-reported depressiveness ( $F_{(2,24)} = 23.52, p < .001; d = 1.58$ ), general health ( $F_{(2,24)} = 10.61, p < .001; d = 1.27$ ), personal resources ( $F_{(2,24)} = 22.13, p < .001; d = 0.90$ ) and mindfulness ( $F_{(2,24)} = 8.99, p < .001; d = 0.90$ ) at post-treatment. Results were stable over a period of three months. Satisfaction with treatment was very high and 72 % ranked in- and between-session media as an active working factor. Further, treatment intensification was described as important advantage.

**Conclusion:** The application of in- and between-session computer-support for the group treatment of depression seems highly feasible. The blended format might be an efficient strategy to improve current group therapy interventions and should be further tested in user-centred and comparative trials.

**Trial registration:** DRKS-ID: DRKS00010894

### Strengths and limitations of this study

- This is the first clinical study on blended group therapy for depression. This innovative treatment combines two low intensity psychosocial interventions, recommended by the National Institute for Health and Care Excellence (NICE, 2009).
- Treatment satisfaction and system usability were assessed by standardised measures, resulting in good comparability with other blended studies. Corresponding results suggest a very high fit of the two intervention strategies.
- Participant selection was based on a multi-modal recruitment strategy and comorbidity was high. Data on treatment stability and adverse effects are provided.
- Small sample size and the uncontrolled design restrict the interpretation of our results. Randomised controlled studies should further investigate this promising treatment format.

### DATA SHARING STATEMENT

We also assessed 5 short scales at pre-measurement. These short scales will be accumulated over different trials and serve as moderators of treatment success and online user behaviour. All data can be obtained by contacting the first or the last author of this study and will be readily shared.

### CONTRIBUTOR SHIP STATEMENT

*Raphael Schuster:* design, acquisition, analysis, drafting, revising  
*Verena Sparr:* acquisition, analysis  
*Isabelle Fichtenbauer:* acquisition, analysis  
*Thomas Berger:* drafting and revising  
*Anton-Rupert Laireiter:* design, drafting and revising

## 1. Introduction

Depression presents a relevant public health concern and imposes high costs on society as well as health systems (Vigo et al., 2016). Therefore, research priorities include health policy and systems research, in particular on how to deliver cost-effective interventions in a low-resource context (Tomlinson et al., 2009). Psychological online interventions have been found effective in reducing common mental health disorders, e.g. depression (Cuijpers et al., 2015) or anxiety (Păsărelu et al., 2017), in such low-resource contexts.

Online interventions offer many advantages. They can provide access to evidence-based treatments and patients can work through the intervention whenever they want (Andersson & Titov, 2014). Usually anonymity is preserved as patients participate at distance, resulting in low social barriers and low risk of stigmatization (Emmelkamp et al., 2014). From the health supplier perspective online interventions guarantee standardized treatments and show good scalability, which has led to the launch of first online clinics (Titov et al., 2015; Hedman et al., 2014). Internet-based interventions can also help with bridging waiting times (Kenter et al., 2013) or enhance treatment effects in aftercare (Ebert et al., 2013). At the same time, online interventions do not fit all patients' needs and personal therapy will remain the cornerstone of mental health care. Respectively, tools and methods developed in online therapy can be integrated into various forms of face-to-face psychotherapy (cf. Krieger et al., 2014).

Due to the variety of possible combinations between online interventions and psychotherapy it remains difficult to define blended interventions concisely. Van der Vaart and colleagues (2014) describe blended therapy as "[...] a combination of online and face-to-face therapy, in which online sessions replace or substitute some (parts) of the sessions with a health professional [...]". According to Kooistra and colleagues (2014), the combination of both intervention strategies should merge into one integrated treatment format. In our study's context, modern media was also be used as a supportive in-session tool (e.g. multimedia presentations and videos). Thus, we define blended therapy as an integrated combination of face-to-face therapy with in- and between-session computer support, aiming at improving the delivery of evidence-based psychotherapy methods and resulting in possible acceleration or intensification of treatment. The online part of blended treatments often entails (video supported) psychoeducation, online exercises and remote therapist feedback on accomplished exercises, as well as mobile diaries and monitoring. These interventions are usually delivered via online platforms (cf. Månsson et al., 2013) or applications for mobile phones (Ly et al., 2014).

1  
2  
3 Blended therapy is at an early research stage - even though first studies reach back to the 1980s and  
4 1990s (cf. Selmi et al., 1982; Selmi et al., 1990; Newman et al., 1996). Computer support has been  
5 found to be useful in the treatment of depression, anxiety or obsessive compulsive disorders (New-  
6 man et al., 1996). However, these studies do not adequately account for the rapid development  
7 modern technologies have undergone, and user-behaviour has changed dramatically ever since.  
8  
9 When examining more recent literature, good acceptability and compatibility with standard treat-  
10 ments are found (Wright et al., 2002). Additionally, computer-assisted programs might shorten  
11 treatment duration while maintaining observed treatment effects (Wright et al., 2005). From a ther-  
12 apy process perspective, Månsson and colleagues (2013) suggest that blended interventions could  
13 foster adherence to evidence based treatment rationales. In Europe, research on blended therapy  
14 currently is on the rise as a multicentre study (E-Compared) commenced in eight countries (Kleiboer  
15 et al., 2016). The Netherlands seem to be Europe's most promotive nation when it comes to imple-  
16 mentation of blended therapy (Ruwaard & Kok, 2015). According to the Netherlands' leading soft-  
17 ware provider (minddistrict) more than 17.000 professionals and 120.000 patients are currently using  
18 some of their blended services (Schuster, Berger & Laireiter, 2017).  
19  
20  
21  
22  
23  
24  
25  
26

27 With little exceptions, research on blended treatments has its primarily focus on individual therapy  
28 and little is known about its potential for group therapy. As it is a recommended treatment in health  
29 guidelines and national health policies (Riedel, 2015; Weber & Strauss, 2015), group therapy has  
30 various applications in in- and outpatient clinics (Yalom, 2005). The National Institute for Health and  
31 Care Excellence (NICE, 2009) recommends group cognitive behavioural therapy (GCBT) for people  
32 with mild to moderate depression who decline other low intensity psychosocial interventions, such  
33 as computerized cognitive behavioural therapy (cCBT) or physical activity programmes. Existing  
34 blended group therapy studies reveal good acceptability for the treatment of anxiety disorders and  
35 suggest possible savings of therapist time (Gruber, 2002; Przeworski & Newman, 2004; Newman et  
36 al., 2014). Additionally, this treatment format allows new ways of therapist-to-client and client-to-  
37 client interaction, such as online supervision of homework tasks or gamification (Miloff et al., 2015).  
38 Yet, literature on blended group treatments for depression remains very scarce, as there does not  
39 exist any literature prior to our first proof-of-concept study (Schuster et al., 2017). Here, good treat-  
40 ment effects were observed in an adult sample, exhibiting a variety of unspecified depressive symp-  
41 toms. Participants perceived online and multimedia support to be of the same importance as group  
42 experience or specific CBT techniques, and in an open evaluation, 25 % freely described online and  
43 media support as an active working factor.  
44  
45  
46  
47  
48  
49  
50  
51  
52  
53

54 The present study aims to carry forward this work by applying the developed blended group ra-  
55 tionale to a sample of clinically depressed adults and by evaluating its usefulness in a more struc-  
56 tured manner.  
57  
58  
59

1  
2  
3 tured and standardized way. Moreover, we were interested in the user behaviour over the course of  
4 time.  
5  
6  
7

## 8 9 **2. Methods**

### 10 11 **2.1 Procedure**

12 The clinical one-arm trial was approved by the local ethics committee (Ethical Review Board, Univer-  
13 sity of Vienna, Ref-Nr:00194) and registered at the German clinical trial register (DRKS-ID:  
14 DRKS00010894). Eligible persons were called and verbally informed consent was obtained by two  
15 independent interviewers. Subsequently, the complete Mini-International Neuropsychiatric Inter-  
16 view, MINI (Sheehan et al., 1998) was applied for study in- or exclusion. Ten days prior to treatment,  
17 eligible participants were required to complete an online battery of self-report measures. Sessions  
18 were held in a double trainer format by two trained and supervised psychologists (VS & IL), both in  
19 the final of their Master studies. At the beginning of the first group session, written informed consent  
20 was signed by all participants. One week after treatment ended, an online post-evaluation battery  
21 had to be completed. Follow-up data was obtained at 3-months.  
22  
23  
24  
25  
26  
27  
28

### 29 30 **2.2 Intervention**

31 The treatment was an 7-week intensive psychoeducational group intervention in which personal  
32 group sessions (90 minutes) alternated with online exercises and remote therapist feedback (9 – 15  
33 min. per patient and week). Psychological key techniques eclectically entailed cognitive behavioural  
34 therapy, positive psychology, mindfulness, acceptance and commitment therapy as well as a special  
35 emphasis on time- and self-management. Online modules were made accessible via a secure web-  
36 based environment. Accomplishing one online session took approximately 50 - 70 minutes (34  
37 minutes of weekly videos included). Participants were able to logon the platform after treatment was  
38 completed. Group sessions were supported by multimedia, e.g. psychoeducational short clips and  
39 PowerPoint presentations. The basic treatment is described comprehensively in our preceding study  
40 (Schuster et al., 2017). Improvements concerned the psychoeducation section and the weekly diary  
41 as well as putting slightly more emphasis on cognitive restructuring techniques. Detailed information  
42 on the course modules is presented in *Table 1*.  
43  
44  
45  
46  
47  
48  
49  
50

### 51 52 **2.3 Participant recruitment and selection**

53 The study was advertised online (e.g. [www.depression.at](http://www.depression.at)) and by handing out flyers in public health  
54 centres and frequented public areas, such as urban pedestrian areas in Vienna. All those interested  
55  
56  
57  
58  
59  
60



1  
2  
3 were invited to visit the study webpage and to fill out an online participation form. Recruitment ended  
4 after sufficient participants had been acquired.  
5

#### 6 Inclusion and exclusion criteria

7  
8 Two independent psychologists with clinical experience conducted the clinical interviews. Partici-  
9 pants aged between 18 – 65, familiar with the use of personal computers and suffering from mild to  
10 moderate depression and/or dysthymia and/or mild to moderate comorbid anxiety were eligible for  
11 the study. According to clinical judgement, participants were excluded if they suffered from severe  
12 depression, severe anxiety disorder, bipolar disorder, schizoaffective disorder, severe psychiatric and  
13 psychotic conditions, substance abuse, suicidal ideation, or if they exhibited low German-language  
14 and/or computer skills or if they were currently undergoing. Psychiatric medication was tolerated,  
15 but had to be kept constant for at least 3 month prior to trial onset. *Figure 1* presents the flowchart,  
16 demonstrating the recruitment and research procedure in detail.  
17  
18  
19  
20  
21  
22

## 23 2.4 Measures

### 24 2.4.1 Primary outcome

25  
26  
27  
28 The primary outcome, reduction of depressed mood, was measured by the short form of the German  
29 translation of the CES-D, Center for Epidemiological Studies-Depression scale (Hautzinger & Bailer,  
30 1993). This questionnaire assesses depression associated emotions, motor functions, and interactive,  
31 cognitive and somatic symptoms on a 16-item 4-step Likert-scale. Higher scores indicate higher levels  
32 of depression and the German version's cut-off value (CES-D > 17) has very high discriminative validi-  
33 ty (Hautzinger & Bailer, 1993). The reliability of the CES-D has been shown to be excellent (Hau-  
34 tzinger et al., 2012). Cronbach's alpha in the present study was .84.  
35  
36  
37  
38

### 39 2.4.2 Secondary outcome measures

40  
41  
42 The General Health Questionnaire (GHQ-12; Goldberg & Williams, 1988) was selected to assess the  
43 degree of self-reported psychological distress. Items are rated on a 4-step bi-modal scale (0-0-1-1)  
44 with higher scores indicating higher levels of psychological distress. The GHQ-12 has shown satisfac-  
45 tory reliability (Goldberg et al., 1997) and good intercultural validity (Schnitz, Kruse & Tress, 1999). A  
46 cut-off of > 1 served as a conservative measure with highest sensitivity and specificity in literature  
47 (Cano et al., 2001). Cronbach's alpha was .83.  
48  
49  
50  
51

52 The German "Fragebogen zur Erfassung von Ressourcen und Selbstmanagementfähigkeiten –  
53 Gesamtressourcen" (FERUS; Jack, 2007) (Questionnaire for the Assessment of Resources and Self-  
54 Management Abilities – common resources), consisting of the subscales "coping", "self-awareness",  
55 "self-efficacy", "self-verbalisation", and "hope" (44 items, 7-point Likert-scales), was applied for the  
56  
57  
58  
59

assessment of personal resources. Higher scores represent higher levels of self-rated personal resources. In the present study Cronbach's alpha of the total resources was .95.

The Mindful Attention Awareness Scale (MAAS; Brown & Ryan, 2003) assesses the frequency of mindful states, with higher levels indicating greater mindful awareness (15 items, 6-point Likert scale). We used a 6-item short version of the German MAAS (Michalak, Heidenreich, Ströhle & Nachtigall, 2008) and Cronbach's alpha in the present study was .83.

#### 2.4.3 Treatment satisfaction and system usability

Usability of online components was assessed by the System Usability Scale (SUS; Brooke, 1996). The SUS is a technology neutral and robust tool for assessing the quality of a given user interface. Empirically derived cut-off scores are graded from SUS > 85.5 (excellent usability) to SUS >71.4 (good usability) and SUS > 50.9 (acceptable usability) on a 10-item 5-point Likert scale (Bangor, Kortum & Miller, 2009). Cronbach's alpha for the current sample was .85.

Participants' satisfaction with the intervention was measured by the German version (ZUF-8; Schmidt et al., 1989) of the Client Satisfaction Questionnaire (CSQ-8; Larsen et al., 1979). This widely used questionnaire addresses several aspects of service satisfaction and is based on an 8-item 4-point Likert scale. In this study Cronbach's alpha was .88.

#### 2.4.4 Appraisal of components, applicability and process aspects

Appraisal of components, applicability, and process aspects of the investigated treatment were assessed by a self-designed battery (55 items) at post-treatment. The battery comprised 9 items on seminar components, 6 items on specific functions (e.g. online platform), 6 items on satisfaction and perceived effectivity of the intervention, one ranking of perceived working factors (cf. Schuster et al., 2017), 16 items on optimal blend, intensity and duration (cf. van der Vaart, 2014), 9 items on mode of delivery (face-to-face or online) (cf. van der Vaart, 2014) and 8 items on perceived (dis-)advantages of blended therapy.

### 2.5 Statistical Analyses

Statistical analyses were carried out using SPSS 22 (IBM Inc., Armonk, NY, USA), and were based on the intention to treat principle (ITT). There were no study dropouts at post-treatment. Missing values at follow-up were imputed according to the last observation carried forward principle (LOCF). Significant changes were analysed by calculating a repeated measures ANOVA. Individual pre-post differences served as basis for the reliable change indexes (RCI; Jacobson & Truax, 1991) and we used internal consistency as a measure for RCI reliability (Lambert and Ogles, 2009), resulting in a reliable

change criterion of 7.22 scale points for the CES-D and 2.62 scale points for the GHQ-12. Additionally, participants were deemed to have undergone clinical significant improvement (CSI) when simultaneously exhibiting reliable change and scoring below CES-D or GHQ-12 post measurement cut-off (CES-D  $\leq 17$ ; GHQ-12  $> 1$ ). For the FERUS, individuals were deemed to have undergone reliable change, if pre and post scores differed more than 16.36 scale points. For the 6-item short version of the German MAAS, the reliable change criterion was 0.91 scale points. Within-group effect sizes were calculated with pooled standard deviation and reported in Cohen's  $d$  (Cohen, 1988). Power analysis was carried out using G\*Power (Faul et al., 2007) and optimal sample size was  $N = 22$  for a medium within-subjects effect size of  $d = 0.65$  (alpha-error  $\alpha = .05$ , power  $\beta = .90$ ).

### 3. Results

#### 3.1 Sample characteristics

There was no dropout during treatment, but three participants missed to fill out the follow-up evaluation and two had to be excluded due to changes in medication. One participant had to be excluded due to commencing psychotherapy. According to the CONSORT guidelines, detailed information on participants' flow can be gained from *Figure 1*. Women constituted the majority of the sample (81 %) and education was high (54 % tertiary education). Participants' age ranged from 23 to 51 (Mean = 33.9, SD = 7.5). A comprehensive overview of participant characteristics can be gained from *Table 2*.

#### 3.2 Primary and secondary outcome measures

All outcome measures indicated significant changes and effect sizes were large to very large (see *Table 3*). For the primary outcome measure CES-D, a statistically significant reduction of self-reported depressive symptoms was found, F-value of  $F_{(2,24)} = 23.52$ ,  $p < .001$ . Regarding secondary outcome measures, self-reported psychological distress, assessed by the GHQ-12, significantly decreased  $F_{(2,24)} = 10.61$ ,  $p < .001$ . Furthermore, personal resources (FERUS) significantly increased,  $F_{(2,24)} = 22.13$ ,  $p < .001$ , as well as the frequency of mindful states (MAAS),  $F_{(2,24)} = 8.99$ ,  $p < .001$ . A proportion of 64 % of patients exhibited clinically significant improvement (CSI) for depressive symptoms and CSI for general health was observed in 62 %. Reliable change (RCI) was 72 % for depression and 62 % for general health. Only one participant deteriorated reliably (4 %). Results were stable over a 3-month follow-up period. Detailed information on observed means, standard deviations, effect sizes and reliable change is depicted in *Table 3*.

#### 3.2 Treatment satisfaction and system usability

1  
2  
3 Usability of online components, assessed by the System Usability Scale (SUS; Brooke, 1996), unveiled  
4 an average usability of 85.3 (SD = 14.49) on a 100-point scale. Highest quality ratings (excellent usa-  
5 bility, SUS > 85) were given by 56 % and another 24 % of participants rated the platform usability as  
6 “good” (SUS > 72). Only one participant (4 %) rated the usability as “low” (SUS < 51). Clients’ service  
7 satisfaction was measured by the Client Satisfaction Questionnaire (CSQ-8; Larsen et al., 1979), and  
8 average satisfaction was 27.4 (SD = 3.9) of 32 possible scale points, indicating good client satisfaction.  
9 On item-level (M= 3.43), an average rating of 3 indicates clients being “somewhat satisfied” and a  
10 rating of 4 scale points translates into “very satisfied”. Here, 84 % of participants gave ratings ≥ 3  
11 scale points.  
12  
13  
14  
15  
16

### 17 3.3 Appraisal of components, applicability and process aspects

18  
19  
20 An additional self-designed battery was applied to explore the participants’ retrospective perception  
21 of the seminar components used, applicability, and process aspects of the blended treatment.  
22  
23

#### 24 3.3.1 Appraisal of components and usage data

25  
26 The results in *Table 4* show that computer and modern media support were generally described as  
27 helpful (5.16 on 6-step Likert-type scale). Almost half of the participants described in-session media  
28 use, between-session communication with the therapist, weekly psychoeducational videos and the  
29 online platform as very helpful, whilst only a small proportion found them of little or no help. Inter-  
30 estingly, participants described group interaction as marginally less relevant compared to computer  
31 and modern media. However, the only clear deviation from the received appraisal was a lower rating  
32 for the unguided discussion forum. *Table 4* also contains statistics on logins and downloads, where a  
33 continuous decrease in activity can be identified over treatment.  
34  
35  
36  
37  
38  
39

#### 40 3.3.2 Applicability of the blended treatment rationale

41  
42 *Table 5* depicts participants’ appraisals of the blended format and the influence of computer support  
43 on therapeutic process aspects in general, as well as preferred duration of our group treatment. The  
44 vast majority (84 %) stated that they would not omit computer support and that this support has the  
45 potential to improve (80 %) and intensify group therapy (72 %). For our participants, blending fits  
46 best the needs of training-alike group treatments. Here 96 % agreed, that blended treatments could  
47 help improve and intensify (88 %) existing rationales. The applicability-rating of blended treatments  
48 for individual therapy was clearly less positive (48 %), while prior therapy experience (54%) did not  
49 predict this appraisal ( $r = 0.116$ ,  $p = 0.580$ ). With a median of 12-15 sessions, preferred treatment  
50 duration was 50 % - 100 % higher than actual treatment duration (7 weeks).  
51  
52  
53  
54  
55  
56

#### 57 3.3.3 Treatment process aspects

1  
2  
3 Statements on treatment process entailed issues regarding perceived treatment flexibility, structure,  
4 information, and group interaction (*Table 5*). Only a small proportion of investigated participants  
5 perceived applied computer and media support as restricting or hindering (16 – 20 %). With a pro-  
6 portion of one quarter to one third, a relevant group of indecisive participants existed. 48 % of partic-  
7 ipants expressed a need for more group interaction and discussion time. In the ranking of subjective-  
8 ly perceived working factors 72 % of participants (rank 4 of 21) described in- and intersession media  
9 use as important treatment factor (*Table 6*).  
10  
11  
12  
13  
14  
15  
16

#### 17 **4. Discussion**

18  
19 The aim of this study was to evaluate a recently developed resource-oriented blended group treat-  
20 ment in an uncontrolled sample of adults, meeting the diagnostic criteria of major depression or  
21 dysthymia. Corresponding outcome measures indicated high to very high treatment effects and a  
22 high response rate on self-reported depressive symptoms and general health. Results were main-  
23 tained over a 3-month follow-up period. There was no dropout during treatment, and satisfaction  
24 with treatment and the blended format was high. Only one participant deteriorated reliably (4 %).  
25 Our results indicate that the investigated group treatment might be a suitable and short treatment  
26 option for mild to moderate depression. From the viewpoint of addressed patients, modern technol-  
27 ogy and communication techniques add value to the treatment.  
28  
29  
30  
31  
32  
33

34 General patient evaluation of the blended group treatment was positive. Most patients stated that  
35 they would not omit technology and that computer and multimedia support could help to improve  
36 existing treatments. These findings support prior literature (e.g. Månsson et al., 2013, Przeworski &  
37 Newman, 2004), and underpin the potential of technology in the group treatment of depression.  
38 Even though more than half of the patients had prior therapy experience, the appraisal was less posi-  
39 tive for individual therapy. This finding can be explained by a possible sceptical preconception and  
40 lack of converse experience (cf. Kooistra et al., 2016). It also might reflect patients' perception of  
41 different preconditions of the two treatment settings. However, when compared to a concept study  
42 on blended individual psychotherapy (Kooistra et al., 2016), usability (SUS) and satisfaction scores  
43 (CSQ-8) of our group treatment were around one standard deviation above. As blended learning  
44 originates from educational groups (e.g. teaching or corporate trainings) (Zumbach, 2010), interven-  
45 tions with a more training-alike character might be particularly feasible for computer and media sup-  
46 port. This assumption is supported by slightly more positive appraisals for psychological trainings  
47 compared to psychotherapy.  
48  
49  
50  
51  
52  
53  
54  
55  
56  
57  
58  
59  
60

1  
2  
3 Our treatment entailed a variety of different computer and online components. The online discussion  
4 forum and remote patient-to-therapist communication have setting-specific relevancy as they open  
5 up additional pathways for client-to-client and client-to-therapist interaction in group therapy. While  
6 remote patient-to-therapist communication was easy to install and described as important, the  
7 unguided online discussion forum was of less relevance for our patients. According to positive  
8 findings in online chat group and gamification studies (e.g. Bauer, Wolf, Haug & Kordy, 2011; Miloff,  
9 Marklund & Carlbring, 2015), we conclude that online group interaction in blended treatments  
10 should either be guided by a therapist (Schulz et al., 2016), or include other incentives to increase  
11 usage and perceived relevancy. Consistently with prior results, participants related in- and  
12 intersession media use to therapy success (*Table 6*). In our first study (Schuster et al., 2017), 25 % of  
13 participants freely described computer support as an active treatment factor in an open text-based  
14 evaluation. The direct ranking presented in this study yielded a notably higher proportion of  
15 agreement. This can be seen as a conceptual replication and might best be understood as a catalytic  
16 potential of computer and media support in fostering other established treatment factors, such as  
17 imparting information (Yalom & Leszcz, 2005) or motivational clarification (Grawe, 2004).

18  
19 Findings regarding process aspects of the blended group format revealed important patient prefer-  
20 ences. Many currently conducted studies on blended therapy investigate possible savings of thera-  
21 pist time by reducing the number of sessions (Newman et al., 2014; Kleiboer et al., 2016). From an  
22 economical point of view, potential time savings are inherently appealing for some mental health  
23 care stakeholders (Ruwaard & Kok, 2015; Topooco et al., 2017). On the other hand, shortened  
24 treatments might entail certain risks, such as a weakened patient-to-therapist bonding (van der  
25 Vaart, 2014). eHealth experts therefore emphasise the need for participatory research and the  
26 importance of target audience's perceptions when designing new treatments (e.g. Nicholas, Boydell  
27 & Christensen, 2016; Yardley et al., 2016). As for that matter, the majority of our sample  
28 retrospectively would have preferred more group sessions (12 – 15 sessions) and more time for  
29 group interaction during each session. Additionally, treatment intensification was described as an  
30 important advantage. Development of blended interventions therefore might benefit from assuring,  
31 that time-efficient short treatments actually meet expectations of addressed patients in the  
32 particular care setting.

33  
34 Assessed objective usage data revealed a constant decrease of webpage logins and downloads.  
35 Whether this tendency indicates a relevant reduction of motivation to persist with blended therapy is  
36 unclear, as satisfaction with treatment was high and usage patterns in the first weeks can be  
37 described in terms of exaggerated activity. In this context, Yardely and colleagues (2016) critically  
38 reflect on current approaches to validly conceptualize engagement by analysing log files of system

usage data. Further investigation on the significance of (dis-)continuous usage data for the blended therapy process can be carried out by small trials of iterative participatory research.

Besides the promising results of the investigated treatment format, several limitations need to be considered when interpreting its findings. *First*, sample size was low and the one-arm study design lacks a control condition. Thus, findings of our study have to be interpreted with limited generalization and the true magnitude of observed treatment effects remains unclear. Also, the study design does not allow inferring the extent to which specific treatment elements (e.g. computer and multimedia elements) contributed to the observed effects. *Second*, participating therapists (IF and VS) lacked prior experience with blended therapy, but underwent preparatory training. Careful preparation and implementation as well as regular supervision seem to be critical success factors in blended therapy interventions (Kenter et al., 2015), and as some online therapy studies show, more experience with a given treatment can result in better outcomes over the course of time (El Alaoui et al., 2015). *Third*, even though clinical interviews were conducted to assess participants' psychopathological status, other properties of our sample might restrict generalisability. The majority of our sample was female and relatively well educated. While comparable sample properties can be found in many online studies and our recruitment was based on a multi-modal recruitment strategy (Linder et al., 2015), future research has to determine, if the investigated treatment proves also feasible for less educated or older patients. *Fourth*, half of our participants lacked alternative experience with other forms of (group) therapy. Those patients' appraisals should be interpreted as positive experience with the undergone treatment, in the absence of knowledge about possible alternatives. Additionally, the group format and the use of modern media might have discouraged certain patients from participating in our study.

## 5. Conclusions

The present study indicates that the blended treatment format is a feasible and valued option for the outpatient group treatment of depression. Due to their properties, psychoeducational groups might be particularly suitable for blending. Here, modern media can be used for in- and intersession support and from our patients perspective treatment intensification is described as an important advantage. Future research should investigate the blended group treatment in a randomized controlled trial.

## Role of funding source



1  
2  
3 This research did not receive any specific grant from funding agencies in the public, commercial, or  
4 not-for-profit sectors.  
5  
6  
7

### 8 9 **Conflict of interest**

10  
11 None of the authors has, or has had, any financial, personal or other relationship with people or or-  
12 ganisations that would interfere with the interpretation and presentation of this study's findings.  
13  
14

### 15 16 17 **References**

- 18  
19  
20 Andersson, G., & Titov, N. (2014). Advantages and limitations of Internet-based interventions for common  
21 mental disorders. *World Psychiatry, 13*(1), 4-11.  
22  
23  
24 Bangor, A., Kortum, P., & Miller, J. (2009). Determining what individual SUS scores mean: Adding an adjective  
25 rating scale. *Journal of usability studies, 4*(3), 114-123.  
26  
27  
28 Bauer, S., Wolf, M., Haug, S., & Kordy, H. (2011). The effectiveness of internet chat groups in relapse prevention  
29 after inpatient psychotherapy. *Psychotherapy Research, 21*, 219-226.  
30  
31  
32 Brooke, J. (1996). SUS: A „quick and dirty“ usability scale. In P. W. Jordan, B. Thomas, B. A. Weerdmeester, & I.  
33 L. McClelland (Eds.) *Usability Evaluation in Industry* (p. 189-194). London, UK: Taylor.  
34  
35  
36 Brown, K. W., & Ryan, R. M. (2003). The benefits of being present: mindfulness and its role in psychological  
37 well-being. *Journal of personality and social psychology, 84*(4), 822.  
38  
39  
40 Cano, A., Sprafkin, R. P., Scaturro, D. J., Lantinga, L. J., Fiese, B. H., & Brand, F. (2001). Mental health screening in  
41 primary care: a comparison of 3 brief measures of psychological distress. *Primary care companion to the Jour-  
42 nal of clinical psychiatry, 3*(5), 206-210.  
43  
44  
45 Cohen, J. (1988). *Statistical power analysis for the behavioral sciences* (2<sup>nd</sup> ed.). Hillsdale, NJ.: Lawrence Erl-  
46 baum Associates.  
47  
48  
49 Cuijpers, P., Riper, H., & Andersson, G. (2015). Internet-based treatment of depression. *Current Opinion in Psy-  
50 chology, 4*, 131-135.  
51  
52  
53 Ebert, D. D., Hannig, W., Tarnowski, T., Sieland, B., Götzky, B., & Berking, M. (2013). Web-based rehabilitation  
54 aftercare following inpatient psychosomatic treatment. *Die Rehabilitation, 52*(3), 164-172.  
55  
56  
57 El Alaoui, S., Hedman, E., Kaldo, V., Hesser, H., Kraepelien, M., Andersson, E., ... Lindefors, N. (2015). Effective-  
58 ness of Internet-based cognitive-behavior therapy for social anxiety disorder in clinical psychiatry. *Journal of  
59 consulting and clinical psychology, 83*(5), 902.  
60



1  
2  
3 Emmelkamp, P. M., David, D., Beckers, T., Muris, P., Cuijpers, P., Lutz, W., ... & Vervliet, B. (2013). Advancing  
4 psychotherapy and evidence-based psychological interventions. *International Journal of Methods in Psychiatric*  
5 *Research*, 23(S1), 58-91.

6  
7  
8 Faul, F., Erdfelder, E., Lang, A. G., & Buchner, A. (2007). G\*Power 3: a flexible statistical power analysis program  
9 for the social, behavioral, and biomedical sciences. *Behavior Research Methods*, 39, 175-191.

10  
11 Goldberg, D. P., & Williams, P. A. (1988). *A users's guide to the General Health Questionnaire*. Windsor, UK:  
12 NFER-Nelson.

13  
14  
15 Goldberg, D. P., Gater, R., Sartorius, N., Ustun, T. B., Piccinelli, M., Gureje, O., & Rutter, C. (1997). The validity of  
16 two versions of the GHQ in the WHO study of mental illness in general health care. *Psychological Medicine*,  
17 27(1), 191-197.

18  
19  
20 Grawe, K. (2004). *Psychological therapy*. Göttingen, Germany: Hogrefe.

21  
22 Gruber, K., Moran, P. J., Roth, W. T. & Taylor, C. B. (2002). Computer-assisted cognitive behavioral group thera-  
23 py for social phobia. *Behavior Therapy*, 32, 155-165.

24  
25  
26 Hautzinger, M., & Bailer, M. (1993). *Allgemeine Depressions Skala (ADS). Manual*. Weinheim, Germany: Beltz.

27  
28 Hautzinger, M., Bailer, M., Hofmeister, D., & Keller, F. (2012). *Allgemeine Depressionsskala. Manual* (2<sup>nd</sup> ed.).  
29 Göttingen, Germany: Hogrefe.

30  
31  
32 Hedman, E., Ljótsson, B., Kaldo, V., Hesser, H., Alaoui, S. E., Kraepelien, M., ... Lindefors, N. (2014). Effectiveness  
33 of Internet-based cognitive behaviour therapy for depression in routine psychiatric care. *Journal of Affective*  
34 *Disorders*, 155, 49-58.

35  
36  
37 IBM, C. (2013). *IBM SPSS statistics for windows, version 22.0*. Armonk, NY: IBM, Corp.

38  
39 Jack, M. (2007). *Fragebogen zur Erfassung von Ressourcen und Selbstmanagementfähigkeiten (FERUS)*. Göttin-  
40 gen, Germany: Hogrefe.

41  
42  
43 Jacobson, N. S., & Turax, P. (1991). Clinical significance: a statistical approach to defining meaningful change in  
44 psychotherapy research. *Journal of consulting and clinical psychology*, 59, 12-19.

45  
46  
47 Kenter, R. M., van de Ven, P. M., Cuijpers, P., Koole, G., Niamat, S., Gerrits, R. S., ... van Straten, A. (2015). Costs  
48 and effects of Internet cognitive behavioral treatment blended with face-to-face treatment: results from a  
49 naturalistic study. *Internet Interventions*, 2(1), 77-83.

50  
51  
52 Kenter, R., Warmerdam, L., Brouwer-Dudokdewit, C., Cuijpers, P., & Straten, A. V. (2013). Guided online treat-  
53 ment in routine mental health care: an observational study on uptake, drop-out and effects. *BMC Psychia-*  
54 *try*, 13(1), 43.

1  
2  
3 Kleiboer, A., Smit, J., Bosmans, J., Ruwaard, J., Andersson, G., Topooco, N., . . . Riper, H. (2016). European COM-  
4 PARative Effectiveness research on blended Depression treatment versus treatment-as-usual (E-COMPARED):  
5 study protocol for a randomized controlled, non-inferiority trial in eight European countries. *Trials*, *17*(1), 387.

6  
7  
8 Kooistra, L. C., Wiersma, J. E., Ruwaard, J., Oppen, P. V., Smit, F., Lokkerbol, J., . . . Riper, H. (2014). Blended vs.  
9 face-to-face cognitive behavioural treatment for major depression in specialized mental health care: study  
10 protocol of a randomized controlled cost-effectiveness trial. *BMC Psychiatry*, *14*(1), 290.

11  
12  
13 Krieger, T., Meyer, B., Sude, K., Urech, A., Maercker, A., & Berger, T. (2014). Evaluating an e-mental health pro-  
14 gram ("deprexis") as adjunctive treatment tool in psychotherapy for depression: design of a pragmatic random-  
15 ized controlled trial. *BMC Psychiatry*, *14*(1), 285.

16  
17  
18 Lambert, M. J., & Ogles, B. M. (2009). Using clinical significance in psychotherapy outcome research: the need  
19 for a common procedure and validity data. *Psychotherapy Research*, *19*(4), 493-501.

20  
21  
22 Larsen, D. L., Attkisson, C. C., Hargreaves, W. A., & Nguyen, T. D. (1979). Assessment of client/patient satisfac-  
23 tion: development of a general scale. *Evaluation and program planning*, *2*(3), 197-207.

24  
25  
26 Lindner, P., Nyström, M. B., Hassmén, P., Andersson, G., & Carlbring, P. (2015). Who seeks ICBT for depression  
27 and how do they get there? Effects of recruitment source on patient demographics and clinical characteristics.  
28 *Internet Interventions*, *2*(2), 221-225.

29  
30  
31 Ly, K. H., Trüschel, A., Jarl, L., Magnusson, S., Windahl, T., Johansson, R., ... & Andersson, G. (2014). Behavioural  
32 activation versus mindfulness-based guided self-help treatment administered through a smartphone applica-  
33 tion: a randomised controlled trial. *BMJ open*, *4*(1), e003440.

34  
35  
36 Månsson, K. N., Ruiz, E. S., Gervind, E., Dahlin, M., & Andersson, G. (2013). Development and Initial Evaluation  
37 of an Internet-Based Support System for Face-to-Face Cognitive Behavior Therapy: A Proof of Concept  
38 Study. *Journal of Medical Internet Research*, *15*(12), e280.

39  
40  
41 Michalak, J., Heidenreich, T., Ströhle, G., & Nachtigall, C. (2008). Die deutsche Version des Mindful Attention  
42 and Awareness Scale (MAAS). Psychometrische Befunde zu einem Achtsamkeitsfragebogen. *Zeitschrift für*  
43 *Klinische Psychologie und Psychotherapie*, *37*(3), 200-208.

44  
45  
46 Miloff, A., Marklund, A., & Carlbring, P. (2015). The challenger app for social anxiety disorder: New advances in  
47 mobile psychological treatment. *Internet Interventions*, *2*, 382-391.

48  
49  
50 National Institute for Health and Care Excellence (2009). *Depression in adults: recognition and management.*  
51 *Clinical Guideline 90*. Retrived from <http://guidance.nice.org.uk/cg123>

52  
53  
54 Newman, M. G., Kenardy, J., Herman, S., & Taylor, C. (1996). The use of hand-held computers as an adjunct to  
55 cognitive-behavior therapy. *Computers in Human Behavior*, *12*(1), 135-143.

1  
2  
3 Newman, M. G., Przeworski, A., Consoli, A. J., & Taylor, C. B. (2014). A randomized controlled trial of ecological  
4 momentary intervention plus brief group therapy for generalized anxiety disorder. *Psychotherapy, 51*, 198.

5  
6 Nicholas, J., Boydell, K., & Christensen, H. (2016). mHealth in psychiatry: time for methodological change. *Evi-*  
7 *dence-based mental health, 19*(2), 33-34.

8  
9  
10 Păsărelu, C. R., Andersson, G., Nordgren, L. B., & Dobrea, A. (2016). Internet-delivered transdiagnostic and  
11 tailored cognitive behavioral therapy for anxiety and depression: a systematic review and meta-analysis of  
12 randomized controlled trials. *Cognitive Behaviour Therapy, 46*(1), 1-28.

13  
14  
15 Przeworski, A., & Newman, M. G. (2004). Palmtop computer-assisted group therapy for social phobia. *Journal*  
16 *of Clinical Psychology, 60*, 179 – 188.

17  
18  
19 Riedel, M. (2015, April 3). *Modelle der Psychotherapieversorgung in Österreich; Endbericht; Studie im Auftrag*  
20 *des Hauptverbandes der österreichischen Sozialversicherungsträger*. Retrieved from  
21 <http://www.hauptverband.at/cdscontent/load?contentid=10008.619271&version=1430822267>

22  
23  
24 Ruwaard, J., & Kok, R. (2015). Wild West eHealth: Time to hold our horses. *European Health Psychologist, 17*(1),  
25 45-49.

26  
27 Schmidt, J., Lamprecht, F., & Wittmann, W. W. (1989). Zufriedenheit mit der stationären Versorgung.  
28 Entwicklung eines Fragebogens und erste Validitätsuntersuchungen. *Psychotherapie, Psychosomatik,*  
29 *Medizinische Psychologie, 39*, 248-255.

30  
31  
32 Schrnitz, N., Kruse, J., & Tress, W. (1999). Psychometric properties of the General Health Questionnaire (GHQ-  
33 12) in a German primary care sample. *Acta psychiatrica Scandinavica, 100*(6), 462-468.

34  
35  
36 Schulz, A., Stolz, T., Vincent, A., Krieger, T., Andersson, G., & Berger, T. (2016). A sorrow shared is a sorrow  
37 halved? A three-arm randomized controlled trial comparing internet-based clinician-guided individual versus  
38 group treatment for social anxiety disorder. *Behaviour Research and Therapy, 84*, 14-26.

39  
40  
41 Schuster, R., Berger, T., & Laireiter, A.-R. (2017). Computer und Psychotherapie – geht das zusammen? Zum  
42 Stand der Entwicklung von Online-und gemischten Interventionen in der Psychotherapie. *Psychotherapeut, XY*,  
43 ZZ-WW

44  
45  
46 Schuster, R., Leitner, I., Carlbring, P., & Laireiter, A.-R. (2017). Exploring blended group interventions for de-  
47 pression: Randomised controlled feasibility study of a blended computer- and multimedia-supported psy-  
48 choeducational group intervention for adults with depressive symptoms. *Internet Interventions, 2*(8), 63-71.

49  
50  
51 Selmi, P. M., Klein, M. H., Greist, J. H., Johnson, J. H., & Harris, W. G. (1982). An investigation of computer-  
52 assisted cognitive-behavior therapy in the treatment of depression. *Behavior Research Methods & Instrumenta-*  
53 *tion, 14*(2), 181-185.

1  
2  
3 Selmi, P. M., Klein, M. H., Griest, J. H., Sorrell, S. P., & Erdman, H. P. (1990). Computer- administered cognitive-  
4 behavioral therapy for depression. *American Journal of Psychiatry*, 147, 51-56.

5  
6 Titov, N., Dear, B. F., Staples, L. G., Bennett-Levy, J., Klein, B., Rapee, R. M., . . . Nielssen, O. B. (2015). MindSpot  
7 Clinic: An Accessible, Efficient, and Effective Online Treatment Service for Anxiety and Depression. *Psychiatric*  
8 *Services*, 66(10), 1043-1050.

9  
10 Tomlinson, M., Rudan, I., Saxena, S., Swartz, L., Tsai, A. C., & Patel, V. (2009). Setting priorities for global mental  
11 health research. *Bulletin of the World Health Organization*, 87(6), 438-446.

12  
13 Topooco, N., Riper, H., Araya, R., Berking, M., Brunn, M., Chevreur, K., ... & Kleiboer, A. (2017). Attitudes to-  
14 wards digital treatment for depression: A European stakeholder survey. *Internet Interventions*, 8, 1-9.

15  
16 Vaart, R. V., Witting, M., Riper, H., Kooistra, L., Bohlmeijer, E. T., & Gemert-Pijnen, L. J. (2014). Blending online  
17 therapy into regular face-to-face therapy for depression: content, ratio and preconditions according to patients  
18 and therapists using a Delphi study. *BMC Psychiatry*, 14(1), 355.

19  
20 Vigo, D., Thornicroft, G., & Atun, R. (2016). Estimating the true global burden of mental illness. *The Lancet Psy-*  
21 *chiatry*, 3(2), 171-178.

22  
23 Weber, R., & Strauss, B. (2015). Group Psychotherapy in Germany. *International Journal of Group Psychothera-*  
24 *py*, 65(4), 513-525.

25  
26 Wright, J. H., Wright, A. S., Albano, A. M., Basco, M. R., Goldsmith, L. J., Raffield, T., & Otto, M. W. (2005). Com-  
27 puter-Assisted Cognitive Therapy for Depression: Maintaining Efficacy While Reducing Therapist  
28 Time. *American Journal of Psychiatry*, 162(6), 1158-1164.

29  
30 Wright, J. H., Wright, A. S., Salmon, P., Beck, A. T., Kuykendall, J., Goldsmith, L. J., & Zickel, M. B. (2002). Devel-  
31 opment and initial testing of a multimedia program for computer-assisted cognitive therapy. *American Journal*  
32 *of Psychotherapy*, 56(1), 76.

33  
34 Yalom, I. D., & Leszcz, M. (2005). *Theory and practice of group psychotherapy* (5<sup>th</sup> ed.). New York, NY: Basic  
35 books.

36  
37 Yardley, L., Spring, B. J., Riper, H., Morrison, L. G., Crane, D. H., Curtis, K., ... & Blandford, A. (2016). Understand-  
38 ing and promoting effective engagement with digital behavior change interventions. *American Journal of*  
39 *Preventive Medicine*, 51(5), 833-842.

40  
41 Zumbach, J. (2010). *Lernen mit neuen Medien. Instruktionspsychologische Grundlagen*. Stuttgart, Germany:  
42 Kohlhammer.

Table 1.

*Psychoeducational lectures and computer-supported components of the intervention.*

| Week  | Lectures & psychoeducation                                                                                                                                                                                                                                                                                                                         | Computer & multimedia components                                            |
|-------|----------------------------------------------------------------------------------------------------------------------------------------------------------------------------------------------------------------------------------------------------------------------------------------------------------------------------------------------------|-----------------------------------------------------------------------------|
|       | Pre-assessment                                                                                                                                                                                                                                                                                                                                     | Worksheet 1<br>Video 1                                                      |
| C.1   | Opening and information on course structure and online platform. Psychoeducation on depression. Introduction to the current concerns concept. Instruction for current concerns diary, and relaxation.                                                                                                                                              | PPT-Presentation<br>Worksheet 2<br>Video 2                                  |
| C.2   | Discussion of homework assignments. Psychoeducation on human perception and cognitive biases. Discussion on frequent cognitive distortions. Psychoeducation on acceptance and mindfulness core principles. Instruction for the thoughts and mindfulness diary task.                                                                                | PPT-Presentation<br>Video 3<br>Mobile phone diary*                          |
| P.3   | Discussion of homework assignments. Psychoeducation on human memory and learning processes. Exercise on cognitive restructuring. Introduction to happiness diary and activity list.                                                                                                                                                                | PPT-Presentation<br>Worksheet 3<br>Videos 4 & 5<br>Mobile phone diary*      |
| P/A.4 | Discussion of homework assignments. Psychoeducation on psychological motivation theories and goal setting, with emphasis on Vroom's VIE-theory (1964). Group exercise on "SMART" goal setting and instruction for Goal-Attainment-Scaling.                                                                                                         | PPT-Presentation<br>Online Goal Attainment-Scaling with feedback            |
|       | Break                                                                                                                                                                                                                                                                                                                                              |                                                                             |
| A.5   | Revision of sessions 1-4. Psychoeducation on self-regulation and self-control. Group exercise on strengths and weaknesses profile. Discussion and refinement of individual goals. Instructions for weekly diary task.                                                                                                                              | PPT-Presentation<br>Contract with myself-Worksheet 4<br>Mobile phone diary* |
| A.6   | Discussion of homework assignments. Psychoeducation on time management, realistic time scheduling and the "small steps concept" by Kanfer. Group exercise on "time-thieves". Group discussion on practical aspects of time management and prioritisation. Introduction to specific time management methods. Group exercise "stress traffic light." | PPT-Presentation<br>Worksheet 5 + Video 5<br>Mobile phone diary*            |
| M.7   | Revision of sessions 5-7. Psychoeducation on slow and problematic change patterns and handling of setbacks. Group discussion on problematic change and relapse prevention. Course conclusion.                                                                                                                                                      | PPT-Presentation                                                            |
|       | Post-assessment                                                                                                                                                                                                                                                                                                                                    |                                                                             |

*Note:* Letters C to M: Course stages (C = contemplation, P = preparation, A = action, M = maintenance); PPT-Presentation = in-session PowerPoint presentation; Mobile phone diary\* = participants were free to choose between a mobile phone diary or a handwritten diary.

Table 2.

*Demographic, behavioural and clinical characteristics of the study sample at pre-treatment (N=26).*

| Characteristic                                                        | Mean (SD) or n (%) |
|-----------------------------------------------------------------------|--------------------|
| Age, mean (SD)                                                        | 33.9 (7.5)         |
| Gender, female, n (%)                                                 | 21 (81)            |
| Education, n (%)                                                      |                    |
| ≥ 9 years (compulsory school)                                         | 2 (8)              |
| ≥ 12 years (A level)                                                  | 9 (35)             |
| ≥ any tertiary education (e.g. university)                            | 14 (54)            |
| Employment, n (%)                                                     |                    |
| - full time                                                           | 10 (38)            |
| - part time                                                           | 7 (27)             |
| - currently none                                                      | 8 (31)             |
| Current psychopharmacological treatment, n (%)                        | 3 (12)             |
| Prior psychotherapeutic treatment, n (%)                              | 14 (54)            |
| Computer experience, n (%)                                            |                    |
| - daily use                                                           | 22 (85)            |
| - few times a week                                                    | 4 (15)             |
| Diagnosis, n (%)                                                      |                    |
| Mild to moderate depression (F32.0 or F32.1)                          | 26 (100)           |
| + Double depression (F32.0 or F32.1 + F34.1)                          | 4 (15)             |
| + Generalized anxiety disorder (F41.1)                                | 4 (15)             |
| + Social anxiety disorder (F40.1)                                     | 3 (12)             |
| + Panic disorder (F41.0)                                              | 2 (8)              |
| + Specific phobia (F40.2)                                             | 2 (8)              |
| + Hypochondriasis (F45.2)                                             | 1 (4)              |
| Comorbidity (participants fulfilling two or more diagnostic criteria) | 12 (46)            |
| 1 comorbidity                                                         | 6 (23)             |
| ≥ 2 comorbidities                                                     | 6 (23)             |

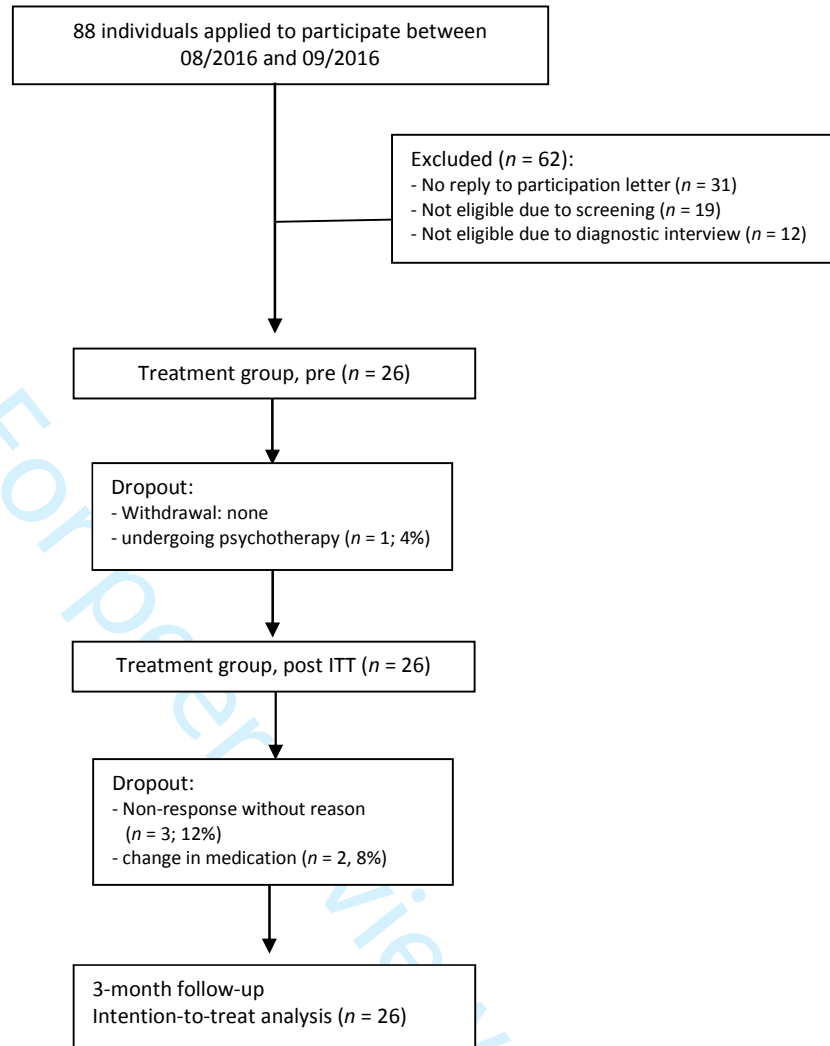

Figure 1. Study's flow chart

Table 3.  
Means, standard deviations, effect sizes (Cohen's *d*) and reliable change for primary and secondary outcomes.

|        | n  | Observed means (SD) |              |              | Effect sizes<br>(observed means) | Reliable change           |                                |
|--------|----|---------------------|--------------|--------------|----------------------------------|---------------------------|--------------------------------|
|        |    | Pre                 | Post         | Follow-up    | Pre- to post<br>effect size      | Pre- to post<br>RCI (CSI) | Pre- to follow-up<br>RCI (CSI) |
| CES-D  | 25 | 24.8 (6.51)         | 14.1 (6.87)  | 14.6 (6.81)  | 1.58<br>[0.92 - 2.18]            | 72 (64)                   | 60 (60)                        |
| GHQ-12 | 25 | 5.52 (2.29)         | 2.00 (3.18)  | 2.52 (3.27)  | 1.27<br>[0.64 - 1.86]            | 68 (62)                   | 68 (44)                        |
| FERUS  | 25 | 134.8<br>(26.4)     | 157.7 (24.2) | 154.4 (24.2) | 0.90<br>[0.31 - 1.47]            | 56                        | 48                             |
| MAAS   | 25 | 3.30 (0.80)         | 4.11 (0.99)  | 4.25 (0.94)  | 0.90<br>[0.30 - 1.47]            | 36                        | 40                             |

Note. Standard deviations are shown in round parentheses and 95 % confidence intervals are shown in square parentheses. CES-D: Center for Epidemiological Studies-Depression scale (cut-off > 17); GHQ-12: General Health Questionnaire (cut-off > 1); FERUS: Questionnaire for the Assessment of Resources and Strengths; MAAS: Mindful Attention Awareness Scale; RCI = reliable change index; CSI = clinically reliable improvement.

Table 4.  
Appraisal of computer components and usage data.

| Seminar components                           | Average           | --- | -- | -  | +  | ++ | +++ |
|----------------------------------------------|-------------------|-----|----|----|----|----|-----|
| Modern media in general                      | 5.16              | -   | 4  | -  | 24 | 20 | 52  |
| Weekly Lectures                              | 5.40              | -   | -  | -  | 16 | 28 | 56  |
| In-session media                             | 5.08              | -   | 4  | 4  | 12 | 40 | 40  |
| between-session communication with therapist | 5.08              | -   | 4  | 4  | 24 | 20 | 48  |
| Weekly psychoeducational videos              | 4.88              | 4   | -  | 8  | 20 | 28 | 40  |
| Online platform                              | 4.8               | -   | 8  | 12 | 12 | 28 | 40  |
| Group interaction                            | 4.64 <sup>+</sup> | -   | -  | 4  | 28 | 36 | 32  |
| Discussion forum                             | 3.52***           | -   | 4  | 48 | 40 | 8  | -   |

  

| Usage data                                    | OS 1 | OS 2 | OS 3 | OS 4 | OS 5 | OS 6 | OS 7 |
|-----------------------------------------------|------|------|------|------|------|------|------|
| Average logins per week (per module)          | 5.0  | 3.4  | 3.6  | 3.2  | 2.7  | 2.5  | 1.8  |
| Average downloads of work sheet / week        | 1.9  | 1.3  | 1.5  | 1.1  | 1.0  | 0.9  | -    |
| Average downloads of in-session slides / week | 1.3  | 1.0  | 1.2  | 0.9  | 0.8  | 0.6  | 0.4  |

Average logins during follow-up period 4.5

Note. --- not at all helpful (%), -- not helpful (%), - of little help (%), + somewhat helpful (%), ++ helpful (%), +++ very helpful (%), <sup>+</sup> = tendentially significant, \*\*\* = highly significant, OS = online session

Table 5.  
Applicability of the blended treatment rationale and treatment process aspects.

| Applicability of the blended treatment                          | Yes (%) | No (%) | <i>p</i> - Value |
|-----------------------------------------------------------------|---------|--------|------------------|
| Would you prefer to omit computer and multimedia                | 16      | 84     |                  |
| Do you think technology could help to improve group trainings   | 96      | 4      |                  |
| ... to improve group psychotherapy                              | 80 *    | 20     | <i>p</i> = 0.043 |
| ... to improve individual psychotherapy                         | 48 ***  | 52     | <i>p</i> = 0.000 |
| Do you think technology could help to intensify group trainings | 88      | 12     |                  |



|                                           |                                  |                 |    |           |
|-------------------------------------------|----------------------------------|-----------------|----|-----------|
| ...                                       | to intensify group psychotherapy | 72 <sup>†</sup> | 28 | p = 0.103 |
| Would you like to continue this treatment |                                  | 88              | 12 |           |
| Optimal number of group sessions (Median) | 12-15                            |                 |    |           |

| Treatment process aspects                             | Yes (%) | Neutral (%) | No (%) |
|-------------------------------------------------------|---------|-------------|--------|
| Used contents resulted in too little flexibility      | 16      | 24          | 60     |
| There was too much structure                          | 20      | 24          | 56     |
| There was too much information                        | 16      | 32          | 52     |
| I'd have preferred more time for talking and exchange | 48      | 32          | 20     |

Note. † p < 0.1, \* p < 0.05, \*\*\* p < 0.001.

Table 6.

Top 10 ranking of subjectively perceived working factors (n = 25).

| Rank | Working factor                               | n counts | % of all participants |
|------|----------------------------------------------|----------|-----------------------|
| 1.   | Weekly lectures                              | 23       | 92                    |
| 2.   | Increase of positive thoughts                | 20       | 80                    |
| 3.   | Restructuring of negative thoughts           | 19       | 76                    |
| 4.   | In- and intersession media use               | 18       | 72                    |
| 4.   | Trainer (social and professional skills)     | 18       | 72                    |
| 6.   | Group (coherence and interpersonal learning) | 17       | 68                    |
| 6.   | Positive activities                          | 17       | 68                    |
| 8.   | Reflexion                                    | 16       | 64                    |
| 9.   | Mindfulness exercises                        | 14       | 56                    |
| 9.   | Exercises on resources and strengths         | 14       | 56                    |

Note: n counts = number of counts associated with a specific working factor; % of all participants = proportion of all participants

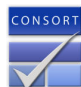

## CONSORT 2010 checklist of information to include when reporting a randomised trial\*

| Section/Topic                    | Item No | Checklist item                                                                                                                                                                              | Reported on page No      |
|----------------------------------|---------|---------------------------------------------------------------------------------------------------------------------------------------------------------------------------------------------|--------------------------|
| <b>Title and abstract</b>        |         |                                                                                                                                                                                             |                          |
|                                  | 1a      | Identification as a randomised trial in the title                                                                                                                                           | <u>uncontrolled</u>      |
|                                  | 1b      | Structured summary of trial design, methods, results, and conclusions (for specific guidance see CONSORT for abstracts)                                                                     | <u>yes, page 2</u>       |
| <b>Introduction</b>              |         |                                                                                                                                                                                             |                          |
| Background and objectives        | 2a      | Scientific background and explanation of rationale                                                                                                                                          | <u>yes, page 4</u>       |
|                                  | 2b      | Specific objectives or hypotheses                                                                                                                                                           | <u>yes, page 5&amp;6</u> |
| <b>Methods</b>                   |         |                                                                                                                                                                                             |                          |
| Trial design                     | 3a      | Description of trial design (such as parallel, factorial) including allocation ratio                                                                                                        | <u>no, one-armed</u>     |
|                                  | 3b      | Important changes to methods after trial commencement (such as eligibility criteria), with reasons                                                                                          | <u>none</u>              |
| Participants                     | 4a      | Eligibility criteria for participants                                                                                                                                                       | <u>yes, page 6&amp;7</u> |
|                                  | 4b      | Settings and locations where the data were collected                                                                                                                                        | <u>yes, page 6</u>       |
| Interventions                    | 5       | The interventions for each group with sufficient details to allow replication, including how and when they were actually administered                                                       | <u>yes, page 6</u>       |
| Outcomes                         | 6a      | Completely defined pre-specified primary and secondary outcome measures, including how and when they were assessed                                                                          | <u>yes, page 7&amp;8</u> |
|                                  | 6b      | Any changes to trial outcomes after the trial commenced, with reasons                                                                                                                       | <u>none</u>              |
| Sample size                      | 7a      | How sample size was determined                                                                                                                                                              | <u>yes, page 9</u>       |
|                                  | 7b      | When applicable, explanation of any interim analyses and stopping guidelines                                                                                                                | <u>none</u>              |
| <b>Randomisation:</b>            |         |                                                                                                                                                                                             |                          |
| Sequence generation              | 8a      | Method used to generate the random allocation sequence                                                                                                                                      | <u>none</u>              |
|                                  | 8b      | Type of randomisation; details of any restriction (such as blocking and block size)                                                                                                         | <u>none</u>              |
| Allocation concealment mechanism | 9       | Mechanism used to implement the random allocation sequence (such as sequentially numbered containers), describing any steps taken to conceal the sequence until interventions were assigned | <u>none</u>              |
| Implementation                   | 10      | Who generated the random allocation sequence, who enrolled participants, and who assigned participants to interventions                                                                     | <u>none</u>              |
| Blinding                         | 11a     | If done, who was blinded after assignment to interventions (for example, participants, care providers, those                                                                                | <u>none</u>              |

|                                                      |     |                                                                                                                                                   |                           |
|------------------------------------------------------|-----|---------------------------------------------------------------------------------------------------------------------------------------------------|---------------------------|
|                                                      |     | assessing outcomes) and how                                                                                                                       | <u>none</u>               |
|                                                      | 11b | If relevant, description of the similarity of interventions                                                                                       | <u>none</u>               |
| Statistical methods                                  | 12a | Statistical methods used to compare groups for primary and secondary outcomes                                                                     | <u>yes, page 8&amp;9</u>  |
|                                                      | 12b | Methods for additional analyses, such as subgroup analyses and adjusted analyses                                                                  | <u>none</u>               |
| <b>Results</b>                                       |     |                                                                                                                                                   |                           |
| Participant flow (a diagram is strongly recommended) | 13a | For each group, the numbers of participants who were randomly assigned, received intended treatment, and were analysed for the primary outcome    | <u>yes, page 9&amp;21</u> |
|                                                      | 13b | For each group, losses and exclusions after randomisation, together with reasons                                                                  | <u>yes, page 9&amp;21</u> |
| Recruitment                                          | 14a | Dates defining the periods of recruitment and follow-up                                                                                           | <u>yes, page 9&amp;21</u> |
|                                                      | 14b | Why the trial ended or was stopped                                                                                                                | <u>yes, page 6/7</u>      |
| Baseline data                                        | 15  | A table showing baseline demographic and clinical characteristics for each group                                                                  | <u>yes, page 9&amp;22</u> |
| Numbers analysed                                     | 16  | For each group, number of participants (denominator) included in each analysis and whether the analysis was by original assigned groups           | <u>yes, page 9&amp;22</u> |
| Outcomes and estimation                              | 17a | For each primary and secondary outcome, results for each group, and the estimated effect size and its precision (such as 95% confidence interval) | <u>yes, page 9&amp;22</u> |
|                                                      | 17b | For binary outcomes, presentation of both absolute and relative effect sizes is recommended                                                       | <u>none</u>               |
| Ancillary analyses                                   | 18  | Results of any other analyses performed, including subgroup analyses and adjusted analyses, distinguishing pre-specified from exploratory         | <u>none</u>               |
| Harms                                                | 19  | All important harms or unintended effects in each group (for specific guidance see CONSORT for harms)                                             | <u>yes, page 9</u>        |
| <b>Discussion</b>                                    |     |                                                                                                                                                   |                           |
| Limitations                                          | 20  | Trial limitations, addressing sources of potential bias, imprecision, and, if relevant, multiplicity of analyses                                  | <u>yes, page 13</u>       |
| Generalisability                                     | 21  | Generalisability (external validity, applicability) of the trial findings                                                                         | <u>yes, page 13</u>       |
| Interpretation                                       | 22  | Interpretation consistent with results, balancing benefits and harms, and considering other relevant evidence                                     | <u>yes, page 11-13</u>    |
| <b>Other information</b>                             |     |                                                                                                                                                   |                           |
| Registration                                         | 23  | Registration number and name of trial registry                                                                                                    | <u>yes, page 6</u>        |
| Protocol                                             | 24  | Where the full trial protocol can be accessed, if available                                                                                       | <u>yes, page 6</u>        |
| Funding                                              | 25  | Sources of funding and other support (such as supply of drugs), role of funders                                                                   | <u>yes, page 13</u>       |

\*We strongly recommend reading this statement in conjunction with the CONSORT 2010 Explanation and Elaboration for important clarifications on all the items. If relevant, we also recommend reading CONSORT extensions for cluster randomised trials, non-inferiority and equivalence trials, non-pharmacological treatments, herbal interventions, and pragmatic trials. Additional extensions are forthcoming: for those and for up to date references relevant to this checklist, see [www.consort-statement.org](http://www.consort-statement.org).

# BMJ Open

## Feasibility and efficacy of blended group therapy (bGT) for major depression: Uncontrolled interventional study in a university outpatient setting

|                                    |                                                                                                                                                                                                                                                                                                                                                                                                                                                                                                                                                                                                                                                          |
|------------------------------------|----------------------------------------------------------------------------------------------------------------------------------------------------------------------------------------------------------------------------------------------------------------------------------------------------------------------------------------------------------------------------------------------------------------------------------------------------------------------------------------------------------------------------------------------------------------------------------------------------------------------------------------------------------|
| Journal:                           | <i>BMJ Open</i>                                                                                                                                                                                                                                                                                                                                                                                                                                                                                                                                                                                                                                          |
| Manuscript ID                      | bmjopen-2017-018412.R1                                                                                                                                                                                                                                                                                                                                                                                                                                                                                                                                                                                                                                   |
| Article Type:                      | Research                                                                                                                                                                                                                                                                                                                                                                                                                                                                                                                                                                                                                                                 |
| Date Submitted by the Author:      | 24-Nov-2017                                                                                                                                                                                                                                                                                                                                                                                                                                                                                                                                                                                                                                              |
| Complete List of Authors:          | Schuster, Raphael; Universitat Salzburg, Department of Psychology<br>Fichtenbauer, Isabelle; Universitat Wien Fakultat fur Psychologie,<br>Department of Applied Psychology: Health, Development and Promotion<br>Sparr, Verena Maria; Universitat Wien Fakultat fur Psychologie,<br>Department of Applied Psychology: Health, Development and Promotion<br>Berger, Thomas; University of Bern , Department of Clinical Psychology<br>and Psychotherapy<br>Laireiter, Anton-Rupert; Universitat Salzburg, Department of Psychology;<br>Universitat Wien Fakultat fur Psychologie, Department of Applied<br>Psychology: Health, Development and Promotion |
| <b>Primary Subject<br>Heading</b>: | Mental health                                                                                                                                                                                                                                                                                                                                                                                                                                                                                                                                                                                                                                            |
| Secondary Subject Heading:         | Public health, Health informatics                                                                                                                                                                                                                                                                                                                                                                                                                                                                                                                                                                                                                        |
| Keywords:                          | Blended Therapy, Blended Group Therapy, Online Interventions, Group<br>Therapy, Depression, Active treatment factors                                                                                                                                                                                                                                                                                                                                                                                                                                                                                                                                     |
|                                    |                                                                                                                                                                                                                                                                                                                                                                                                                                                                                                                                                                                                                                                          |

SCHOLARONE™  
Manuscripts

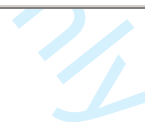

1  
2  
3 Feasibility and efficacy of blended group therapy (bGT) for major depression: Uncontrolled interven-  
4 tional study in a university outpatient setting  
5

6 Raphael Schuster<sup>1</sup>, Isabelle Fichtenbauer<sup>3</sup>, Verena Sparr<sup>3</sup>, Thomas Berger<sup>2</sup>, Anton-Rupert Laireiter<sup>1,3</sup>  
7  
8  
9

10  
11 1. Department of Psychology, University of Salzburg  
12

13 2. Department of Clinical Psychology and Psychotherapy, University of Bern  
14

15 3. Department of Applied Psychology: Health, Development and Promotion, Faculty of Psychology,  
16 University of Vienna  
17  
18

19  
20  
21  
22 \*Corresponding author:  
23

24 Raphael Schuster, MSc.

25 Fachbereich Psychologie, Universität Salzburg

26 Hellbrunnerstraße 34, 5020 Salzburg, Österreich

27  
28  
29 raphael.schuster@sbg.ac.at  
30  
31  
32  
33  
34  
35  
36  
37  
38  
39  
40  
41  
42  
43  
44  
45  
46  
47  
48  
49  
50  
51  
52  
53  
54  
55  
56  
57  
58  
59  
60

## Abstract

**Objective:** This study investigated the acceptability and efficacy of a novel blended (face-to-face and computer-based) group intervention for the low-threshold treatment of major depression and comorbid anxiety.

**Design:** Patient-centred uncontrolled interventional study.

**Setting:** University outpatient setting in a general community sample. A multi-modal recruitment strategy (public health centres and public areas) was applied.

**Participants:** Based on independent interviews, 26 participants, diagnosed with major depressive disorder (81 % female; 23 % comorbidity > 1, 23 % comorbidity > 2), entered treatment.

**Intervention:** Positive, acceptance-based and resource-oriented psychology principles served as the theoretical basis for the low-threshold intervention. The blended format included face-to-face therapy, complemented with multimedia presentations and a platform featuring videos, online work sheets, an unguided group-chat, as well as remote therapist-patient communication.

**Main outcome measures:** The Center for Epidemiological Studies-Depression scale (CES-D) and the twelve-item General Health Questionnaire (GHQ-12).

**Results:** Large to very large within group effect sizes were found on self-reported depressiveness ( $F_{(2,46.37)} = 25.69, p < .001; d = 1.80$ ), general health ( $F_{(2,46.73)} = 11.47, p < .001; d = 1.32$ ), personal resources ( $F_{(2,43.36)} = 21.17, p < .001; d = 0.90$ ) and mindfulness ( $F_{(2,46.22)} = 9.40, p < .001; d = 1.12$ ) after a follow-up period of three months. Treatment satisfaction was very high and 69 % ranked computer and multimedia use as an active treatment factor. Furthermore, treatment intensification was described as important advantage. Almost half of patients would have preferred more time for personal exchange.

**Conclusion:** The application of in- and between-session computer support for the group treatment of major depression seems feasible. The development of blended interventions can benefit from assuring that highly structured treatments actually meet patients' expectations. As a next step, blended group therapy for depression should be tested in comparative trials in routine care.

**Trial registration:** DRKS-ID: DRKS00010894

### Strengths and limitations of this study

- This is the first clinical study on blended group therapy (bGT) for major depression. This innovative treatment combines two low intensity psychosocial interventions, recommended by the National Institute for Health and Care Excellence.
- Participant selection was based on a multi-modal recruitment strategy and comorbidity was high. Data on treatment stability and adverse effects are provided.
- Results indicate a high fit between group therapy and supportive computer elements. The study entails a detailed view on applied treatment components, including possible improvements.
- Very high treatment effects were observed and blended elements were replicated as subjectively perceived active treatment factor.
- The uncontrolled study-design and the university outpatient-setting restrict the interpretability of results.

### DATA SHARING STATEMENT

We also assessed 5 short scales at pre-measurement. These short scales will be accumulated over different studies and serve as moderators of treatment success and online user behaviour. All data can be obtained by contacting the first or the last author of this study and will be readily shared.

### CONTRIBUTOR SHIP STATEMENT

*Raphael Schuster:* design, acquisition, analysis, drafting, revising  
*Verena Sparr:* acquisition, analysis  
*Isabelle Fichtenbauer:* acquisition, analysis  
*Thomas Berger:* drafting and revising  
*Anton-Rupert Laireiter:* design, drafting and revising

## 1. Introduction

Depression presents a relevant public health concern and imposes high costs on society as well as on health systems [1]. Therefore, research priorities include health policy and system research, in particular, how to deliver cost-effective interventions in a low-resource context [2, 3]. Psychological online interventions have been found effective in reducing common mental health disorders, e.g. depression [4] and anxiety [5], in such low-resource contexts.

Online interventions offer many advantages; they can provide access to evidence-based treatments and patients can work through the intervention whenever they want [6]. Usually anonymity is preserved as patients participate at distance, resulting in low social barriers and low risk of stigmatization [7]. From a health suppliers perspective online interventions guarantee standardized treatments and show good scalability, which has led to the launch of the first online clinics [8, 9]. Internet-based interventions can also help with bridging waiting times [10] or enhance treatment effects during aftercare [11]. At the same time, online interventions do not fit all patients' needs (e.g. need for more personal contact or diverging preferences). Consequently, classical face-to-face therapy will remain an important basis of mental health care. That being said, tools and methods developed in online therapy can be integrated into various forms of face-to-face psychotherapy [12].

Due to the variety of possible combinations between online interventions and psychotherapy it remains difficult to define blended interventions concisely. Van der Vaart and colleagues [13] describe blended therapy as "[...] a combination of online and face-to-face therapy, in which online sessions replace or substitute some (parts) of the sessions with a health professional [...]". According to Kooistra and colleagues [14], the combination of both intervention strategies should merge into one integrated treatment format. In our study's context, new media was also used as a supportive in-session tool (e.g. multimedia presentations and videos). Thus, we define blended therapy as an integrated combination of face-to-face therapy with computer or app support. It aims at improving the delivery of evidence-based psychotherapy methods and results in a possible acceleration or intensification of treatment. The online part of blended treatments often entails psychoeducation, online exercises and remote therapist feedback on accomplished exercises, as well as mobile diaries or monitoring [15]. Interventions are usually delivered via online platforms [16] or applications for mobile phones [17].

Blended therapy is at an early stage of research - even though first studies date back to the 1980s and 1990s [18-20]. At that time, computer support had been found to be useful in the treatment of depression, anxiety or obsessive compulsive disorders [20]. However, these early studies do not adequately account for the rapid development modern technologies have undergone, and user-



behaviour has changed dramatically since then. When examining more recent literature, good acceptability and compatibility with standard treatments are found [21]. Additionally, computer-assisted programs may well shorten treatment duration while maintaining observed treatment effects [22]. In Europe, research on blended therapy currently is on the rise, as a multicentre study (E-COMPARED) investigates possible time savings in routine care [23]. From a therapy process perspective, Månsson and colleagues [16] suggest that blended interventions could foster adherence to evidence based treatment rationales, because the structure provided by blended therapy might prevent therapists from so called therapist drift [24]. Regarding implementation of blended therapy, the Netherlands seem to be Europe's most promotive nation [25]. According to Netherlands' leading software provider (Minddistrict) more than 17.000 professionals and 120.000 patients are currently using some of their blended services [26].

With little exceptions, research on blended therapy has its primary focus on individual therapy and little is known about the potential for group therapy. As it is a recommended treatment in health guidelines and national health policies [27, 28], group therapy has various applications in in- and outpatient clinics [29]. For example, the National Institute for Health and Care Excellence [30] recommends group cognitive behavioural therapy (GCBT) for people with mild to moderate depression who decline other low intensity psychosocial interventions, such as computerized cognitive behavioural therapy (cCBT). Therefore, the integration of computer support and face-to-face group therapy might result in an optimized treatment, in which personal contact is preserved to a wide extend. Existing blended group therapy (bGT) studies reveal high acceptability for the treatment of anxiety disorders and suggest possible savings of therapist time [31, 32, 33]. Additionally, bGT allows new ways of therapist-to-client and client-to-client interaction, such as online supervision of homework tasks or gamification [34]. Yet, literature on bGT for depression remains very scarce, as there do not exist any published articles prior to our first proof-of-concept study [35]. Here, good treatment effects were observed in an adult sample, exhibiting a variety of unspecified depressive symptoms. Participants rated online and multimedia support as equally relevant as group experience or specific CBT techniques. In an open evaluation 25 % freely described online and multimedia support as an active treatment factor.

The present study aims to carry forward this work by applying the developed blended group intervention to a sample of clinically depressed adults, and evaluating its usefulness in a more structured and standardized way. Moreover, we were interested in analysing system usage and corresponding changes over the course of time.

## 2. Methods

### 2.1 Procedure

The clinical one-arm interventional study was approved by the local ethics committee (Ethical Review Board, University of Vienna, Ref-Nr:00194) and registered at the German clinical trial register (DRKS-ID: DRKS00010894). Eligible persons were called and informed consent was obtained verbally by two independent interviewers. Subsequently, the complete Mini-DIPS was applied for study in- or exclusion [36]. The Mini-DIPS is a 30-minute short version of the German DIPS (Diagnostic Interview for Psychological Disorders) [37], based on ICD-10 depression criteria. Ten days prior to treatment, eligible participants ( $N = 26$ ) were required to complete an online questionnaire of self-report measures. Sessions were held in a double trainer format by two trained and supervised psychologists (VS & IL), both in the final year of their Master studies of clinical psychology. Both trainers had prior experience with conducting group therapy in clinical settings. Sessions took place in a specially equipped seminar room at the University of Vienna, Faculty of Psychology (Department of Applied Psychology: Health, Development and Promotion). At the beginning of the first group session, written informed consent was signed by all participants. One week after treatment ended, an online post-evaluation questionnaire was completed and follow-up data was obtained three months later.

### 2.2 Intervention

The treatment comprised a 7-week intensive psychoeducation, self-management group intervention, in which personal sessions (90 minutes) alternated with online exercises and remote therapist feedback. Psychological key techniques eclectically entailed cognitive behavioural therapy, positive psychology, mindfulness, acceptance and commitment therapy as well as a special emphasis on time- and self-management. The intervention focused on the reduction of depressive symptoms and aimed at increasing personal resources, but was not tailored to treat comorbid anxiety. Online modules were made accessible via a secure web-based non-profit environment, featuring videos, online work sheets, an unguided group-chat, as well as remote therapist-patient communication. Accomplishing one online session took approximately 50 - 70 minutes (34 minutes of weekly videos included). Group sessions were supported by multimedia, e.g. psychoeducational short clips and PowerPoint presentations. Participants were also able to logon the platform after the entire treatment had ended. The basic treatment is described comprehensively in our preceding study [35]. Improvements are in regards to the psychoeducation section and the weekly diary as well as putting slightly more emphasis on cognitive restructuring techniques. Detailed information on weekly modules is presented in *Table 1*.

### 2.3 Participant recruitment and selection

1  
2  
3 The study was advertised online (e.g. [www.depression.at](http://www.depression.at)) and by handing out flyers in public health  
4 centres and populated public areas, such as urban pedestrian areas in Vienna. All those interested  
5 were invited to visit the study webpage and to fill out an online participation form. During the entire  
6 procedure, no special recruitment strategy was applied for comorbid anxiety. Recruitment ended  
7 after sufficient participants had been acquired.  
8  
9

#### 10 11 Inclusion and exclusion criteria

12  
13 Two independent psychologists with clinical experience conducted the diagnostic interviews. Partici-  
14 pants aged between 18 – 65, familiar with the use of personal computers and suffering from mild to  
15 moderate levels of major depression and/or dysthymia and/or mild to moderate comorbid anxiety  
16 were eligible for the study. According to clinical judgement, participants were excluded if they suf-  
17 fered from severe depression ( $\geq 7$  criteria, including main symptoms), severe anxiety disorder, bipo-  
18 lar disorder, schizoaffective disorder, severe psychiatric and psychotic conditions, substance abuse,  
19 suicidal ideation, or if they exhibited low German-language and/or computer skills. Participants were  
20 also excluded if they were currently undergoing psychotherapy. Psychiatric medication was tolerat-  
21 ed, but had to be kept constant for at least three months prior to study onset. *Figure 1* presents the  
22 flowchart, demonstrating the recruitment and research procedure in detail.  
23  
24  
25  
26  
27  
28

## 29 30 **2.4 Measures**

### 31 32 2.4.1 Primary outcome

33  
34 The primary outcome, reduction of depressed mood, was measured by the short form of the German  
35 translation of the CES-D, Center for Epidemiological Studies-Depression scale [38]. This questionnaire  
36 assesses depression associated emotions and motor functions, as well as interactive, cognitive and  
37 somatic symptoms on a 16-item 4-step Likert-scale. Higher scores indicate higher levels of depression  
38 and the German version's cut-off value ( $CES-D > 17$ ) has high discriminative validity [38]. The reliabil-  
39 ity of the CES-D has been shown to be excellent [39]. Cronbach's alpha in the present study was .84.  
40  
41  
42  
43

### 44 45 2.4.2 Secondary outcome measures

46  
47 The General Health Questionnaire (GHQ-12) [40] was selected to assess the degree of self-reported  
48 psychological distress. Items are rated on a 4-step bi-modal scale (0-0-1-1) with higher scores indicat-  
49 ing higher levels of psychological distress. The GHQ-12 has shown satisfactory reliability [41] and  
50 good intercultural validity [42]. A cut-off of  $> 1$  served as a conservative measure with highest sensi-  
51 tivity and specificity in literature [43]. Cronbach's alpha was .83.  
52  
53  
54

55  
56 The German "Fragebogen zur Erfassung von Ressourcen und Selbstmanagementfähigkeiten –  
57 Gesamtressourcen" (FERUS, Questionnaire for the Assessment of Resources and Self-Management  
58  
59

1  
2  
3 Abilities – common resources) [44], consisting of the subscales “coping”, “self-awareness”, “self-  
4 efficacy”, “self-verbalisation”, and “hope” (44 items, 7-point Likert-scales), was applied for the as-  
5 sessment of personal resources. Higher scores represent higher levels of self-rated personal re-  
6 sources. In the present study Cronbach’s alpha of the total resources was .95.  
7  
8

9  
10 The Mindful Attention Awareness Scale (MAAS) [45] assesses the frequency of mindful states, with  
11 higher levels indicating greater mindful awareness (15 items, 6-point Likert scale). We used a 6-item  
12 short version of the German MAAS [46] and Cronbach’s alpha in the present study was .83.  
13  
14

#### 15 2.4.3 Treatment satisfaction and system usability

16  
17 Usability of online and multimedia elements was assessed by the System Usability Scale (SUS) [47].  
18 The SUS is a technology-neutral robust tool for assessing the quality of a given user interface. Empiri-  
19 cally derived cut-off scores are graded from SUS > 85.5 (excellent usability) to SUS >71.4 (good usabil-  
20 ity) and SUS > 50.9 (acceptable usability) on a 10-item 5-point Likert scale [48]. Cronbach’s alpha for  
21 the current sample was .85.  
22  
23  
24

25  
26 Participants' overall satisfaction with treatment was measured by the German version (ZUF-8) [49] of  
27 the Client Satisfaction Questionnaire (CSQ-8) [50]. This widely used questionnaire addresses several  
28 aspects of service satisfaction and is based on an 8-item 4-point Likert scale. In this study Cronbach’s  
29 alpha was .88.  
30  
31  
32

#### 33 2.4.4 Appraisal of new media elements, applicability and process aspects

34  
35 Appraisal of new media elements, applicability, and process aspects of the investigated treatment  
36 were assessed by a self-designed questionnaire (55 items) at post-treatment. The questionnaire  
37 comprised 9 items on intervention elements, 6 items on specific functions (e.g. online platform), 6  
38 items on satisfaction and perceived efficacy of the intervention, one ranking of perceived active  
39 treatment factors [35], 16 items on optimal blend, intensity and duration [13], 9 items on mode of  
40 delivery (face-to-face or online) [13], and 8 items on perceived (dis-)advantages of blended therapy.  
41  
42  
43  
44  
45

### 46 2.5 Statistical Analyses

47  
48 Statistical analyses were carried out using SPSS 24 [51]. Significant pre- to follow-up changes were  
49 analysed by linear mixed models (LMM), with restricted maximum likelihood estimation (REML) and  
50 compound symmetry as covariance type. Missing values on outcome measures were analysed in  
51 agreement with the intention to treat principle (ITT). Individual pre- to follow-up differences served  
52 as basis for the reliable change indexes (RCI) [52] and we used internal consistency as a measure for  
53 RCI reliability [53], resulting in a reliable change criterion of 7.22 scale points for the CES-D and 2.62  
54  
55  
56  
57  
58  
59  
60

1  
2  
3 scale points for the GHQ-12. Additionally, participants were deemed to have undergone clinically  
4 significant improvement (CSI) when simultaneously exhibiting reliable change and scoring below CES-  
5 D or GHQ-12 post measurement cut-off ( $CES-D \leq 17$ ;  $GHQ-12 > 1$ ). Within-group effect sizes were  
6 calculated with pooled standard deviation and reported in Cohen's  $d$  [54]. Power analysis was carried  
7 out using G\*Power [55], resulting in an estimated sample size of  $N = 22$ , for a conservative medium  
8 within-subjects effect size of  $d = 0.65$  (alpha-error  $\alpha = .05$ , power  $\beta = .90$ ). Differences in appraisals of  
9 intervention elements (section 3.3.1) were calculated by t-tests (comparing against gran average),  
10 and for the analyses of treatment applicability and process aspects (section 3.3.2) paired t-tests were  
11 applied.  
12  
13  
14  
15  
16  
17

### 18 3. Results

#### 19 3.1 Sample characteristics

20 There were no dropouts during treatment, but three participants did not fill out the follow-up evalu-  
21 ation. Two patients reported changes in medication and one patient commenced psychotherapy.  
22 According to ITT-principles, those patients remained in the analyses. According to the CONSORT  
23 guidelines, detailed information on participants' flow can be gained from *Figure 1*. Women constitut-  
24 ed the majority of the sample (81 %) and education was high (54 % tertiary education). Participants'  
25 age ranged from 23 to 51 ( $M = 33.9$ ,  $SD = 7.5$ ). A comprehensive overview of participant characteris-  
26 tics can be gained from *Table 2*.  
27  
28  
29  
30  
31  
32

#### 33 3.2.1 Primary and secondary outcome measures

34 All outcome measures indicated significant changes and effect sizes were large to very large (see  
35 *Table 3*). For the primary outcome measure CES-D, a statistically significant reduction of self-reported  
36 depressive symptoms was found, F-value of  $F_{(2, 46.37)} = 25.69$ ,  $p < .001$ . Regarding secondary outcome  
37 measures, self-reported psychological distress, assessed by the GHQ-12, significantly decreased  
38  $F_{(2,46.73)} = 11.47$ ,  $p < .001$ . Furthermore, personal resources (FERUS) significantly increased,  $F_{(2,43.36)} =$   
39  $21.17$ ,  $p < .001$ , as well as the frequency of mindful states (MAAS),  $F_{(2,46.22)} = 9.40$ ,  $p < .001$ . At follow-  
40 up, a proportion of 70 % of patients exhibited clinically significant improvement (CSI) for depressive  
41 symptoms and CSI for general health was observed in 75 %. One participant deteriorated reliably (4  
42 %). Detailed information on observed means, standard deviations, effect sizes and reliable change is  
43 depicted in *Table 3*.  
44  
45  
46  
47  
48  
49  
50  
51

#### 52 3.2.2 Treatment satisfaction and system usability

53 Usability of online and multimedia elements, assessed by the System Usability Scale (SUS) [47], un-  
54 veiled an average usability of 85.3 ( $SD = 14.49$ ) on a 100-point scale. Highest quality ratings (excellent  
55  
56  
57  
58  
59  
60

1  
2  
3 usability, SUS > 85) were given by 56 % and another 24 % of participants rated the platform usability  
4 as “good” (SUS > 72). One participant (4 %) rated the usability as “low” (SUS < 51). Clients’ service  
5 satisfaction was measured by the Client Satisfaction Questionnaire (CSQ-8) [50], and average satis-  
6 faction was 27.4 ( $SD = 3.9$ ) of 32 possible scale points, indicating “good” client satisfaction. On item-  
7 level ( $M = 3.43$ ), an average rating of 3 indicates clients being “somewhat satisfied” and a rating of 4  
8 scale points translates into “very satisfied”. Here, 84 % of participants gave ratings  $\geq 3$  scale points.

### 12 3.3 Appraisal of new media elements, applicability and process aspects

13  
14  
15 To explore participants’ retrospective perception of new media elements, as well as applicability and  
16 process aspects of the blended treatment, an additional self-designed questionnaire was applied.

#### 17 3.3.1 Appraisal of new media elements and usage data

18  
19  
20 The results in *Table 4* show that computer and multimedia support were generally described as help-  
21 ful ( $M = 5.16$  on 6-step Likert-type scale). Almost half of the participants described in-session multi-  
22 media use, between-session communication with the therapist, weekly psychoeducational videos  
23 and the online platform as very helpful, whilst a smaller proportion found them of little or no help.  
24 Interestingly, participants described group interaction as marginally less relevant compared to com-  
25 puter and multimedia. However, the only clear deviation from average was a lower rating for the  
26 unguided discussion forum. *Table 4* also provides descriptive statistics on logins and downloads,  
27 where a continuous decrease in activity can be identified over treatment.

#### 28 3.3.2 Applicability of the blended treatment rationale

29  
30  
31 *Table 5* depicts participants’ appraisals of the blended format and the influence of computer support  
32 on therapeutic process aspects in general, as well as preferred duration of the applied group treat-  
33 ment. The majority (84 %) stated that they would not omit computer support and that this support  
34 has the potential to improve (80 %) and intensify group therapy (72 %). For our participants, blending  
35 best fitted the needs of training-alike group treatments. Here 96 % agreed, that blended treatments  
36 could help improve and intensify (88 %) existing rationales. The applicability-rating of blended treat-  
37 ments for individual therapy was clearly less positive (48 %), while prior therapy experience (54%) did  
38 not predict this appraisal ( $r = 0.116$ ,  $p = 0.580$ ). With a median of 12 - 15 sessions, preferred treat-  
39 ment duration was 50 % - 100 % higher than the actual treatment (7 weeks).

#### 40 3.3.3 Treatment process aspects

41  
42  
43 Statements on treatment process entailed issues regarding perceived treatment flexibility, structure,  
44 information, and group interaction (*Table 5*). A small proportion of investigated participants per-

ceived applied computer and multimedia support as restricting or hindering (16 – 20 %). With a proportion of one quarter to one third, a group of indecisive participants existed. 48 % of participants expressed a desire for more group interaction and discussion time. In the ranking of subjectively perceived active treatment factors, 69 % of participants (rank 4 of 21) described in- and intersession computer and multimedia use as an important treatment factor (*Table 6*).

#### 4. Discussion

The aim of this study was to evaluate a recently developed resource-oriented blended group treatment in an uncontrolled sample of adults, fulfilling the diagnostic criteria for major depression or dysthymia. Corresponding outcome measures indicated high to very high treatment effects and a high response rate on self-reported depressive symptoms and general health. Results were maintained over a 3-month follow-up period. There was no withdrawal from treatment, and satisfaction with treatment and the blended format was high. Only one participant deteriorated reliably (4 %). From the viewpoint of the addressed patients, modern technology and communication techniques add value to existing group treatments.

Regarding patients' general appraisals, the evaluation of the blended group treatment was positive. These findings support prior literature [16, 32], and underpin the potential of technology for the group treatment of depression. Most patients stated that they would not omit technology and that computer and multimedia support could help to improve existing treatments. Even though more than half of the patients had received prior therapy, the appraisal was less positive for individual therapy (cf. section 3.3.2). This finding can be explained by a possible sceptical preconception and lack of converse experience [14]. It might also reflect patients' perception of different preconditions of the two settings. However, when compared to a concept study on blended individual psychotherapy [14], usability (SUS) and satisfaction scores (CSQ-8) of our group treatment were around one standard deviation above. As blended learning originates from educational groups (e.g. teaching or corporate trainings) [56], interventions with more training-alike character may be particularly feasible for computer and multimedia support. This assumption is also reflected by slightly more positive appraisals for training-alike interventions, compared to classical group therapy (cf. section 3.3.2). Yet, presented results are preliminary and have to be interpreted with caution.

The investigated treatment entailed a variety of different computer and online elements. The online discussion forum and remote patient-to-therapist communication have setting-specific relevancy as they open up additional pathways for client-to-client and client-to-therapist interaction in group therapy. While remote patient-to-therapist communication was easy to install and described as



1  
2  
3 important, the unguided online discussion forum was of less relevance for our patients. According to  
4 positive findings in online chat group and gamification studies [34, 57], we conclude that online  
5 group interaction in blended treatments should either be guided by a therapist [58], or include other  
6 incentives to increase usage and perceived relevancy. During debriefing, some patients also  
7 explained, that their need for group interaction was satisfied by the weekly reunions.  
8  
9

10  
11 Consistent with prior results, participants related in- and intersession computer and multimedia use  
12 to therapy success (*Table 6*). In our first study [35], 25 % of participants freely described computer  
13 support as an active treatment factor. The direct ranking presented in this study yielded a notably  
14 higher proportion of agreement. Additionally, treatment intensification was described as an  
15 important advantage. Results from a forthcoming qualitative article on patients' experiences with  
16 blended group therapy support the present findings (personal communication by Schuster, Raphael,  
17 September 2017). Regarding the interpretation, patients' appraisals might best be conceptualized as  
18 the description of a catalytic effect, which possibly fosters other established treatment factors, such  
19 as imparting information [29] or motivational clarification [59]. Even though first results from  
20 comparative studies are promising [60, 61], future research has to determine, if patients' positive  
21 appraisals translate into superior effects of blended therapy in routine care. Still, from a product  
22 development perspective, patients' connection of blended elements with therapy success can be  
23 seen as an important success criterion.  
24  
25  
26  
27  
28  
29  
30  
31

32 Findings regarding process aspects of the blended group format revealed important patient prefer-  
33 ences. Many currently conducted studies on blended therapy investigate possible savings of thera-  
34 pist time by reducing the number of sessions (23, 33). From an economical point of view, potential  
35 time savings are inherently appealing for some mental health care stakeholders [25, 62]. On the  
36 other hand, shortened treatments might entail certain risks, such as a weakened patient-to-therapist  
37 bonding [13]. eHealth experts therefore emphasise the need for participatory research and the  
38 importance of target audience's perceptions when designing new treatments [63, 64]. As for that  
39 matter, the majority of our sample retrospectively would have preferred more group sessions (12 –  
40 15 sessions) and half of our sample required more time for group interaction during each session  
41 (cf. section 3.3.2). Development and future uptake of blended interventions may therefore benefit  
42 from assuring that highly structured or time-efficient treatments actually meet the expectations of  
43 addressed patients in a particular care setting.  
44  
45  
46  
47  
48  
49  
50  
51

52 Assessed objective usage data revealed a constant decrease of webpage logins and downloads (cf.  
53 section 3.3.1). Whether this tendency indicates a relevant reduction of motivation to persist with  
54 blended therapy is unclear, as satisfaction with treatment was high and usage patterns in the first  
55 weeks can be described in terms of exaggerated activity. In this context, Yardley and colleagues [64]  
56  
57  
58  
59  
60



1  
2  
3 critically reflect on current approaches to validly conceptualize engagement by analysing log files of  
4 system usage data. Further investigation on the significance of (dis-)continuous usage data for the  
5 blended therapy process can be carried out by small studies of iterative participatory research.  
6  
7

8 Besides the promising results of the investigated treatment, several limitations need to be consid-  
9 ered when interpreting its findings. *First*, sample size was low and the one-arm study design lacks a  
10 control condition. Thus, findings of our study have to be interpreted with limited generalization and  
11 the true magnitude of observed treatment effects remains unclear. Also, the study design does not  
12 allow inferring the actual extent to which specific treatment elements (e.g. computer and multimedia  
13 elements) effectively contributed to the observed effects. *Second*, participating therapists (IF and VS)  
14 lacked prior experience with blended therapy, but underwent preparatory training. Careful prepara-  
15 tion and implementation as well as regular supervision seem to be critical success factors in blended  
16 therapy interventions [65], and as some online therapy studies show, more experience with a given  
17 treatment can result in better outcomes over the course of time [66]. *Third*, even though clinical in-  
18 terviews were conducted to assess participants' psychopathological status, other properties of our  
19 sample restrict generalisability. The majority of our sample was female and relatively well educated.  
20 While comparable sample properties can be found in many online studies and our recruitment was  
21 based on a multi-modal recruitment strategy [67], future research has to determine, if the investi-  
22 gated treatment proves also feasible for less educated or older patients. *Fourth*, compared to Univer-  
23 sity of Salzburg (where the intervention was developed), the institute for applied psychology lacks a  
24 fully equipped routine outpatient clinic. As a consequence, further research in routine care is need-  
25 ed. *Fifth*, half of our participants lacked alternative experience with other forms of (group) therapy.  
26 Those patients' appraisals should be interpreted as positive experience with the undergone treat-  
27 ment, in the absence of experience with possible alternatives. Additionally, the group format and the  
28 use of new media might have discouraged certain patients from participating in our study.  
29  
30  
31  
32  
33  
34  
35  
36  
37  
38  
39  
40  
41

## 42 **5. Conclusions**

43  
44 The present study indicates that the blended format is feasible for the outpatient group treatment of  
45 major depression. Due to their properties, psychoeducational groups with elements of self-  
46 management or behavioural activation might be particularly suitable for blending. New media can be  
47 used for in- and intersession support and from patients' perspective, treatment intensification is  
48 described as an important advantage. Future research should investigate the feasibility and benefits  
49 of blended group therapy in routine care.  
50  
51  
52  
53  
54  
55  
56

## 57 **Role of funding source**

This research did not receive any specific grant from funding agencies in the public, commercial, or not-for-profit sectors.

### Conflict of interest

None of the authors has, or has had, any financial, personal or other relationship with people or organisations that would interfere with the interpretation and presentation of this study's findings.

### References

1. Vigo, D., Thornicroft, G., & Atun, R. (2016). Estimating the true global burden of mental illness. *The Lancet Psychiatry*, 3(2), 171-178.
2. Tomlinson, M., Rudan, I., Saxena, S., Swartz, L., Tsai, A. C., & Patel, V. (2009). Setting priorities for global mental health research. *Bulletin of the World Health Organization*, 87(6), 438-446.
3. Wykes, T., Haro, J. M., Belli, S. R., Obradors-Tarragó, C., Arango, C., Ayuso-Mateos, J. L., ... & Elfeddali, I. (2015). Mental health research priorities for Europe. *The Lancet Psychiatry*, 2(11), 1036-1042.
4. Cuijpers, P., Riper, H., & Andersson, G. (2015). Internet-based treatment of depression. *Current Opinion in Psychology*, 4, 131-135.
5. Păsărelu, C. R., Andersson, G., Nordgren, L. B., & Dobrean, A. (2016). Internet-delivered transdiagnostic and tailored cognitive behavioral therapy for anxiety and depression: a systematic review and meta-analysis of randomized controlled trials. *Cognitive Behaviour Therapy*, 46(1), 1-28.
6. Andersson, G., & Titov, N. (2014). Advantages and limitations of Internet-based interventions for common mental disorders. *World Psychiatry*, 13(1), 4-11.
7. Emmelkamp, P. M., David, D., Beckers, T., Muris, P., Cuijpers, P., Lutz, W., ... & Vervliet, B. (2013). Advancing psychotherapy and evidence-based psychological interventions. *International Journal of Methods in Psychiatric Research*, 23(S1), 58-91.
8. Titov, N., Dear, B. F., Staples, L. G., Bennett-Levy, J., Klein, B., Rapee, R. M., . . . Niessen, O. B. (2015). MindSpot Clinic: An Accessible, Efficient, and Effective Online Treatment Service for Anxiety and Depression. *Psychiatric Services*, 66(10), 1043-1050.
9. Hedman, E., Ljótsson, B., Kaldö, V., Hesser, H., Alaoui, S. E., Kraepelien, M., ... Lindefors, N. (2014). Effectiveness of Internet-based cognitive behaviour therapy for depression in routine psychiatric care. *Journal of Affective Disorders*, 155, 49-58.
10. Kenter, R., Warmerdam, L., Brouwer-Dudokde Wit, C., Cuijpers, P., & Straten, A. V. (2013). Guided online treatment in routine mental health care: an observational study on uptake, drop-out and effects. *BMC Psychiatry*, 13(1), 43.
11. Ebert, D. D., Hannig, W., Tarnowski, T., Sieland, B., Götzky, B., & Berking, M. (2013). Web-based rehabilitation aftercare following inpatient psychosomatic treatment. *Die Rehabilitation*, 52(3), 164-172.

12. Erbe, D., Eichert, H. C., Riper, H., & Ebert, D. D. (2017). Blending Face-to-Face and Internet-Based Interventions for the Treatment of Mental Disorders in Adults: Systematic Review. *Journal of Medical Internet Research*, *19*(9), e306.
13. van der Vaart, R. V., Witting, M., Riper, H., Kooistra, L., Bohlmeijer, E. T., & Gemert-Pijnen, L. J. (2014). Blending online therapy into regular face-to-face therapy for depression: content, ratio and preconditions according to patients and therapists using a Delphi study. *BMC Psychiatry*, *14*(1), 355.
14. Kooistra, L. C., Wiersma, J. E., Ruwaard, J., Oppen, P. V., Smit, F., Lokkerbol, J., . . . Riper, H. (2014). Blended vs. face-to-face cognitive behavioural treatment for major depression in specialized mental health care: study protocol of a randomized controlled cost-effectiveness trial. *BMC Psychiatry*, *14*(1), 290.
15. Kaiser, T., & Laireiter, A. R. (2017). DynAMo: A Modular Platform for Monitoring Process, Outcome, and Algorithm-Based Treatment Planning in Psychotherapy. *JMIR medical informatics*, *5*(3), e20.
16. Månsson, K. N., Ruiz, E. S., Gervind, E., Dahlin, M., & Andersson, G. (2013). Development and Initial Evaluation of an Internet-Based Support System for Face-to-Face Cognitive Behavior Therapy: A Proof of Concept Study. *Journal of Medical Internet Research*, *15*(12), e280.
17. Ly, K. H., Trüschel, A., Jarl, L., Magnusson, S., Windahl, T., Johansson, R., ... & Andersson, G. (2014). Behavioural activation versus mindfulness-based guided self-help treatment administered through a smartphone application: a randomised controlled trial. *BMJ open*, *4*(1), e003440.
18. Selmi, P. M., Klein, M. H., Greist, J. H., Johnson, J. H., & Harris, W. G. (1982). An investigation of computer-assisted cognitive-behavior therapy in the treatment of depression. *Behavior Research Methods & Instrumentation*, *14*(2), 181-185.
19. Selmi, P. M., Klein, M. H., Griest, J. H., Sorrell, S. P., & Erdman, H. P. (1990). Computer-administered cognitive-behavioral therapy for depression. *American Journal of Psychiatry*, *147*, 51-56.
20. Newman, M. G., Kenardy, J., Herman, S., & Taylor, C. (1996). The use of hand-held computers as an adjunct to cognitive-behavior therapy. *Computers in Human Behavior*, *12*(1), 135-143.
21. Wright, J. H., Wright, A. S., Salmon, P., Beck, A. T., Kuykendall, J., Goldsmith, L. J., & Zickel, M. B. (2002). Development and initial testing of a multimedia program for computer-assisted cognitive therapy. *American Journal of Psychotherapy*, *56*(1), 76.
22. Wright, J. H., Wright, A. S., Albano, A. M., Basco, M. R., Goldsmith, L. J., Raffield, T., & Otto, M. W. (2005). Computer-Assisted Cognitive Therapy for Depression: Maintaining Efficacy While Reducing Therapist Time. *American Journal of Psychiatry*, *162*(6), 1158-1164.
23. Kleiboer, A., Smit, J., Bosmans, J., Ruwaard, J., Andersson, G., Topooco, N., . . . Riper, H. (2016). European COMPARative Effectiveness research on blended Depression treatment versus treatment-as-usual (E-COMPARED): study protocol for a randomized controlled, non-inferiority trial in eight European countries. *Trials*, *17*(1), 387.
24. Waller, G. (2009). Evidence-based treatment and therapist drift. *Behaviour Research and Therapy*, *47*(2), 119-127.
25. Ruwaard, J., & Kok, R. (2015). Wild West eHealth: Time to hold our horses. *European Health Psychologist*, *17*(1), 45-49.

- 1  
2  
3 26. Schuster, R., Berger, T., & Laireiter, A.-R. (2017). Computer und Psychotherapie – geht das zusammen?  
4 Zum Stand der Entwicklung von Online- und gemischten Interventionen in der Psychotherapie.  
5 *Psychotherapeut*, 1-12.  
6  
7 27. Riedel, M. (2015, April 3). *Modelle der Psychotherapieversorgung in Österreich; Endbericht; Studie im*  
8 *Auftrag des Hauptverbandes der österreichischen Sozialversicherungsträger*. Retrieved from  
9 <http://www.hauptverband.at/cdscontent/load?contentid=10008.619271&version=1430822267>  
10  
11 28. Weber, R., & Strauss, B. (2015). Group Psychotherapy in Germany. *International Journal of Group Psy-*  
12 *chotherapy*, 65(4), 513-525.  
13  
14 29. Yalom, I. D., & Leszcz, M. (2005). *Theory and practice of group psychotherapy* (5<sup>th</sup> ed.). New York, NY:  
15 Basic books.  
16  
17 30. National Institute for Health and Care Excellence (2009). *Depression in adults: recognition and man-*  
18 *agement. Clinical Guideline 90*. Retrived from <http://guidance.nice.org.uk/cg123>  
19  
20 31. Gruber, K., Moran, P. J., Roth, W. T. & Taylor, C. B. (2002). Computer-assisted cognitive behavioral  
21 group therapy for social phobia. *Behavior Therapy*, 32, 155-165.  
22  
23 32. Przeworski, A., & Newman, M. G. (2004). Palmtop computer-assisted group therapy for social phobia.  
24 *Journal of Clinical Psychology*, 60, 179 – 188.  
25  
26 33. Newman, M. G., Przeworski, A., Consoli, A. J., & Taylor, C. B. (2014). A randomized controlled trial of  
27 ecological momentary intervention plus brief group therapy for generalized anxiety disorder. *Psycho-*  
28 *therapy*, 51, 198.  
29  
30 34. Miloff, A., Marklund, A., & Carlbring, P. (2015). The challenger app for social anxiety disorder: New ad-  
31 vances in mobile psychological treatment. *Internet Interventions*, 2, 382-391.  
32  
33 35. Schuster, R., Leitner, I., Carlbring, P., & Laireiter, A.-R. (2017). Exploring blended group interventions  
34 for depression: Randomised controlled feasibility study of a blended computer- and multimedia-  
35 supported psychoeducational group intervention for adults with depressive symptoms. *Internet*  
36 *Interventions*, 2(8), 63-71.  
37  
38 36. Margraf, J. (2013). *Mini-DIPS: Diagnostisches Kurz-Interview bei psychischen Störungen*. Berlin:  
39 Springer.  
40  
41 37. Margraf, J., Schneider, S., Ehlers, A., DiNardo, P., & Barlow, D. (2013). *DIPS Diagnostisches Interview*  
42 *bei psychischen Störungen: Interviewleitfaden*. Berlin: Springer.  
43  
44 38. Hautzinger, M., & Bailer, M. (1993). *Allgemeine Depressions Skala (ADS). Manual*. Weinheim,  
45 Germany: Beltz.  
46  
47 39. Hautzinger, M., Bailer, M., Hofmeister, D., & Keller, F. (2012). *Allgemeine Depressionsskala. Manual*  
48 (2<sup>nd</sup> ed.). Göttingen, Germany: Hogrefe.  
49  
50 40. Goldberg, D. P., & Williams, P. A. (1988). *A users's guide to the General Health Questionnaire*. Windsor,  
51 UK: NFER-Nelson.  
52  
53 41. Goldberg, D. P., Gater, R., Sartorius, N., Ustun, T. B., Piccinelli, M., Gureje, O., & Rutter, C. (1997). The  
54 validity of two versions of the GHQ in the WHO study of mental illness in general health care. *Psycho-*  
55 *logical Medicine*, 27(1), 191-197.  
56  
57  
58  
59  
60

- 1
  - 2
  - 3
  - 4
  - 5
  - 6
  - 7
  - 8
  - 9
  - 10
  - 11
  - 12
  - 13
  - 14
  - 15
  - 16
  - 17
  - 18
  - 19
  - 20
  - 21
  - 22
  - 23
  - 24
  - 25
  - 26
  - 27
  - 28
  - 29
  - 30
  - 31
  - 32
  - 33
  - 34
  - 35
  - 36
  - 37
  - 38
  - 39
  - 40
  - 41
  - 42
  - 43
  - 44
  - 45
  - 46
  - 47
  - 48
  - 49
  - 50
  - 51
  - 52
  - 53
  - 54
  - 55
  - 56
  - 57
  - 58
  - 59
  - 60
42. Schnritz, N., Kruse, J., & Tress, W. (1999). Psychometric properties of the General Health Questionnaire (GHQ-12) in a German primary care sample. *Acta psychiatrica Scandinavica*, 100(6), 462-468.
43. Cano, A., Sprafkin, R. P., Scaturro, D. J., Lantinga, L. J., Fiese, B. H., & Brand, F. (2001). Mental health screening in primary care: a comparison of 3 brief measures of psychological distress. *Primary care companion to the Journal of clinical psychiatry*, 3(5), 206-210.
44. Jack, M. (2007). *Fragebogen zur Erfassung von Ressourcen und Selbstmanagementfähigkeiten (FERUS)*. Göttingen, Germany: Hogrefe.
45. Brown, K. W., & Ryan, R. M. (2003). The benefits of being present: mindfulness and its role in psychological well-being. *Journal of personality and social psychology*, 84(4), 822.
46. Michalak, J., Heidenreich, T., Ströhle, G., & Nachtigall, C. (2008). Die deutsche Version des Mindful Attention and Awareness Scale (MAAS). Psychometrische Befunde zu einem Achtsamkeitsfragebogen. *Zeitschrift für Klinische Psychologie und Psychotherapie*, 37(3), 200-208.
47. Brooke, J. (1996). SUS: A „quick and dirty“ usability scale. In P. W. Jordan, B. Thomas, B. A. Weerdmeester, & I. L. McClelland (Eds.) *Usability Evaluation in Industry* (p. 189-194). London, UK: Taylor.
48. Bangor, A., Kortum, P., & Miller, J. (2009). Determining what individual SUS scores mean: Adding an adjective rating scale. *Journal of usability studies*, 4(3), 114-123.
49. Schmidt, J., Lamprecht, F., & Wittmann, W. W. (1989). Zufriedenheit mit der stationären Versorgung. Entwicklung eines Fragebogens und erste Validitätsuntersuchungen. *Psychotherapie, Psychosomatik, Medizinische Psychologie*, 39, 248-255.
50. Larsen, D. L., Attkisson, C. C., Hargreaves, W. A., & Nguyen, T. D. (1979). Assessment of client/patient satisfaction: development of a general scale. *Evaluation and program planning*, 2(3), 197-207.
51. IBM, C. (2016). *IBM SPSS statistics for windows, version 24.0*. Armonk, NY: IBM, Corp.
52. Jacobson, N. S., & Turax, P. (1991). Clinical significance: a statistical approach to defining meaningful change in psychotherapy research. *Journal of consulting and clinical psychology*, 59, 12-19.
53. Lambert, M. J., & Ogles, B. M. (2009). Using clinical significance in psychotherapy outcome research: the need for a common procedure and validity data. *Psychotherapy Research*, 19(4), 493-501.
54. Cohen, J. (1988). *Statistical power analysis for the behavioral sciences* (2<sup>nd</sup> ed.). Hillsdale, NJ: Lawrence Erlbaum Associates.
55. Faul, F., Erdfelder, E., Lang, A. G., & Buchner, A. (2007). G\*Power 3: a flexible statistical power analysis program for the social, behavioral, and biomedical sciences. *Behavior Research Methods*, 39, 175-191.
56. Zumbach, J. (2010). *Lernen mit neuen Medien. Instruktionspsychologische Grundlagen*. Stuttgart, Germany: Kohlhammer.
57. Bauer, S., Wolf, M., Haug, S., & Kordy, H. (2011). The effectiveness of internet chat groups in relapse prevention after inpatient psychotherapy. *Psychotherapy Research*, 21, 219-226.
58. Schulz, A., Stolz, T., Vincent, A., Krieger, T., Andersson, G., & Berger, T. (2016). A sorrow shared is a sorrow halved? A three-arm randomized controlled trial comparing internet-based clinician-guided individual versus group treatment for social anxiety disorder. *Behaviour Research and Therapy*, 84, 14-26.
59. Grawe, K. (2004). *Psychological therapy*. Göttingen, Germany: Hogrefe.

- 1  
2  
3  
4  
5  
6  
7  
8  
9  
10  
11  
12  
13  
14  
15  
16  
17  
18  
19  
20  
21  
22  
23  
24  
25  
26  
27  
28  
29  
30  
31  
32  
33  
34  
35  
36  
37  
38  
39  
40  
41  
42  
43  
44  
45  
46  
47  
48  
49  
50  
51  
52  
53  
54  
55  
56  
57  
58  
59  
60
60. Zwerenz, R., Becker, J., Knickenberg, R. J., Siepmann, M., Hagen, K., & Beutel, M. E. (2017). Online Self-Help as an Add-On to Inpatient Psychotherapy: Efficacy of a New Blended Treatment Approach. *Psychotherapy and Psychosomatics*, *86*(6), 341-350.
61. Berger, T., Krieger, T., Sude, K., Meyer, B., & Maercker, A. (2017). Evaluating an e-mental health program ("deprexis") as adjunctive treatment tool in psychotherapy for depression: Results of a pragmatic randomized controlled trial. *Journal of Affective Disorders*.
62. Topooco, N., Riper, H., Araya, R., Berking, M., Brunn, M., Chevreur, K., ... & Kleiboer, A. (2017). Attitudes towards digital treatment for depression: A European stakeholder survey. *Internet Interventions*, *8*, 1-9.
63. Nicholas, J., Boydell, K., & Christensen, H. (2016). mHealth in psychiatry: time for methodological change. *Evidence-based mental health*, *19*(2), 33-34.
64. Yardley, L., Spring, B. J., Riper, H., Morrison, L. G., Crane, D. H., Curtis, K., ... & Blandford, A. (2016). Understanding and promoting effective engagement with digital behavior change interventions. *American Journal of Preventive Medicine*, *51*(5), 833-842.
65. Kenter, R. M., van de Ven, P. M., Cuijpers, P., Koole, G., Niamat, S., Gerrits, R. S., ... van Straten, A. (2015). Costs and effects of Internet cognitive behavioral treatment blended with face-to-face treatment: results from a naturalistic study. *Internet Interventions*, *2*(1), 77-83.
66. El Alaoui, S., Hedman, E., Kaldø, V., Hesser, H., Kraepelien, M., Andersson, E., ... Lindefors, N. (2015). Effectiveness of Internet-based cognitive-behavior therapy for social anxiety disorder in clinical psychiatry. *Journal of consulting and clinical psychology*, *83*(5), 902.
67. Lindner, P., Nyström, M. B., Hassmén, P., Andersson, G., & Carlbring, P. (2015). Who seeks ICBT for depression and how do they get there? Effects of recruitment source on patient demographics and clinical characteristics. *Internet Interventions*, *2*(2), 221-225.

Table 1.

*Group sessions and computer and multimedia elements of the intervention.*

| Week  | Group session                                                                                                                                                                                                                                                                                           | Computer & multimedia elements                                              |
|-------|---------------------------------------------------------------------------------------------------------------------------------------------------------------------------------------------------------------------------------------------------------------------------------------------------------|-----------------------------------------------------------------------------|
|       | Pre-assessment                                                                                                                                                                                                                                                                                          | Worksheet 1<br>Video 1                                                      |
| C.1   | Opening and information about intervention and online platform. Psychoeducation on depression. Introduction to the current concerns concept. Instruction for current concerns diary, and relaxation.                                                                                                    | PPT-Presentation<br>Worksheet 2<br>Video 2                                  |
| C.2   | Discussion of homework assignments. Psychoeducation on human perception and cognitive biases. Discussion on frequent cognitive distortions. Psychoeducation on acceptance and mindfulness principles. Instruction for the "Thoughts and mindfulness" diary task.                                        | PPT-Presentation<br>Video 3<br>Mobile phone diary*                          |
| P.3   | Discussion of homework assignments. Psychoeducation on human memory and learning processes. Exercise on cognitive restructuring. Introduction to "Happiness" diary and activity list.                                                                                                                   | PPT-Presentation<br>Worksheet 3<br>Videos 4 & 5<br>Mobile phone diary*      |
| P/A.4 | Discussion of homework assignments. Psychoeducation on psychological motivation theories and goal setting, with emphasis on Vroom's VIE-theory (1964). Group exercise on "SMART" goal setting and instruction for Goal-Attainment-Scaling.                                                              | PPT-Presentation<br>Online Goal Attainment-Scaling with feedback            |
|       | Break                                                                                                                                                                                                                                                                                                   |                                                                             |
| A.5   | Revision of sessions 1-4. Psychoeducation on self-regulation and self-control. Group exercise on strengths and weaknesses profile. Discussion and refinement of individual goals. Instructions for weekly diary task.                                                                                   | PPT-Presentation<br>Contract with myself-Worksheet 4<br>Mobile phone diary* |
| A.6   | Discussion of homework assignments. Psychoeducation on time management, realistic time scheduling. Group exercise "Time-thieves". Group discussion on practical aspects of time management and prioritisation. Introduction to specific time management methods. Group exercise "Stress traffic light". | PPT-Presentation<br>Worksheet 5 + Video 5<br>Mobile phone diary*            |
| M.7   | Revision of sessions 5-7. Psychoeducation on slow and problematic change patterns and handling of setbacks. Group discussion on problematic change and relapse prevention.                                                                                                                              | PPT-Presentation                                                            |
|       | Post-assessment                                                                                                                                                                                                                                                                                         |                                                                             |

*Note:* Letters C to M: Treatment stages (C = contemplation, P = preparation, A = action, M = maintenance); PPT-Presentation = in-session PowerPoint presentation; Mobile phone diary\* = participants were free to choose between a mobile phone diary or a handwritten diary.



Table 2.

*Demographic, behavioural and clinical characteristics of the study sample at pre-treatment (N = 26).*

| Characteristic                                                        | Mean (SD) or n (%) |
|-----------------------------------------------------------------------|--------------------|
| Age, mean (SD)                                                        | 33.9 (7.5)         |
| Gender, female, n (%)                                                 | 21 (81)            |
| Education, n (%)                                                      |                    |
| ≥ 9 years (compulsory school)                                         | 3 (12)             |
| ≥ 12 years (A level)                                                  | 9 (34)             |
| ≥ any tertiary education (e.g. university)                            | 14 (54)            |
| Employment, n (%)                                                     |                    |
| - full time                                                           | 11 (42)            |
| - part time                                                           | 7 (27)             |
| - currently none                                                      | 8 (31)             |
| Current psychopharmacological treatment, n (%)                        | 3 (12)             |
| Prior psychotherapeutic treatment, n (%)                              | 14 (54)            |
| Computer experience, n (%)                                            |                    |
| - daily use                                                           | 22 (85)            |
| - few times a week                                                    | 4 (15)             |
| Diagnosis, n (%)                                                      |                    |
| Major depression (F32.0 or F32.1)                                     | 26 (100)           |
| + Double depression (F32.0 or F32.1 + F34.1)                          | 4 (15)             |
| + Generalized anxiety disorder (F41.1)                                | 4 (15)             |
| + Social anxiety disorder (F40.1)                                     | 3 (12)             |
| + Panic disorder (F41.0)                                              | 2 (8)              |
| + Specific phobia (F40.2)                                             | 2 (8)              |
| + Hypochondriasis (F45.2)                                             | 1 (4)              |
| Comorbidity (participants fulfilling two or more diagnostic criteria) | 12 (46)            |
| 1 comorbidity                                                         | 6 (23)             |
| ≥ 2 comorbidities                                                     | 6 (23)             |



Table 3.  
Means, standard deviations, effect sizes (Cohen's *d*) and reliable change for primary and secondary outcomes.

|        | N  | Observed means (SD) |                |                   | Effect sizes<br>(observed means) | Reliable change           |                                |
|--------|----|---------------------|----------------|-------------------|----------------------------------|---------------------------|--------------------------------|
|        |    | Pre                 | Post           | Follow-up         | Pre- to follow-up<br>effect size | Pre- to post<br>RCI (CSI) | Pre- to follow-up<br>RCI (CSI) |
| CES-D  | 26 | 24.58<br>(6.51)     | 14.19 (6.73)   | 13.28 (6.06)      | 1.80<br>[1.13 - 2.41]            | 69 (65)                   | 70 (70)                        |
| GHQ-12 | 26 | 5.50 (2.25)         | 2.00 (3.11)    | 2.05 (2.94)       | 1.32<br>[0.70 - 1.89]            | 65 (65)                   | 75 (75)                        |
| FERUS  | 26 | 134.54<br>(25.94)   | 156.04 (25.22) | 157.52<br>(25.31) | 0.90<br>[0.31 - 1.45]            | --                        | --                             |
| MAAS   | 26 | 3.29 (0.78)         | 4.05 (1.01)    | 4.25 (0.93)       | 1.12<br>[0.52 - 1.68]            | --                        | --                             |

Note. Standard deviations are shown in round parentheses and 95 % confidence intervals are shown in square parentheses. CES-D: Center for Epidemiological Studies-Depression scale (cut-off > 17); GHQ-12: General Health Questionnaire (cut-off > 1); FERUS: Questionnaire for the Assessment of Resources and Strengths; MAAS: Mindful Attention Awareness Scale; RCI = reliable change index; CSI = clinically reliable improvement.

Table 4.  
Appraisal of intervention elements and usage data (N = 26).

| Intervention elements                        | Average           | --- | -- | -  | +  | ++ | +++ |
|----------------------------------------------|-------------------|-----|----|----|----|----|-----|
| New media in general                         | 5.16              | -   | 4  | -  | 24 | 20 | 52  |
| Weekly group sessions                        | 5.40              | -   | -  | -  | 16 | 28 | 56  |
| In-session multimedia                        | 5.08              | -   | 4  | 4  | 12 | 40 | 40  |
| between-session communication with therapist | 5.08              | -   | 4  | 4  | 24 | 20 | 48  |
| Weekly psychoeducational videos              | 4.88              | 4   | -  | 8  | 20 | 28 | 40  |
| Online platform                              | 4.8               | -   | 8  | 12 | 12 | 28 | 40  |
| Group interaction                            | 4.64 <sup>+</sup> | -   | -  | 4  | 28 | 36 | 32  |
| Discussion forum                             | 3.52***           | -   | 4  | 48 | 40 | 8  | -   |

  

| Usage data                                    | OS 1 | OS 2 | OS 3 | OS 4 | OS 5 | OS 6 | OS 7 |
|-----------------------------------------------|------|------|------|------|------|------|------|
| Average logins per week (per module)          | 5.0  | 3.4  | 3.6  | 3.2  | 2.7  | 2.5  | 1.8  |
| Average downloads of work sheet / week        | 1.9  | 1.3  | 1.5  | 1.1  | 1.0  | 0.9  | -    |
| Average downloads of in-session slides / week | 1.3  | 1.0  | 1.2  | 0.9  | 0.8  | 0.6  | 0.4  |

Average logins during follow-up period 4.5

Note. --- not at all helpful (%), -- not helpful (%), - of little help (%), + somewhat helpful (%), ++ helpful (%), +++ very helpful (%), <sup>+</sup> = tentatively significant, \*\*\* = highly significant, OS = online session

Table 5.  
Applicability of the blended treatment rationale and treatment process aspects (N = 26).

| Applicability of the blended treatment                           | Yes (%) | No (%) | p-Value   |
|------------------------------------------------------------------|---------|--------|-----------|
| Would you prefer to omit computer and multimedia elements?       | 16      | 84     |           |
| Do you think technology could help to improve group trainings?   | 96      | 4      |           |
| ... to improve group psychotherapy?                              | 80 *    | 20     | p = 0.043 |
| ... to improve individual psychotherapy?                         | 48 ***  | 52     | p = 0.000 |
| Do you think technology could help to intensify group trainings? | 88      | 12     |           |

1  
2  
3 ... to intensify group psychotherapy? 72<sup>†</sup> 28  $p = 0.103$   
4 Would you like to continue this treatment? 88 12

5 Optimal number of group sessions (MD) 12-15

| Treatment process aspects                             | Yes (%) | Neutral (%) | No (%) |
|-------------------------------------------------------|---------|-------------|--------|
| Used contents resulted in too little flexibility      | 16      | 24          | 60     |
| There was too much structure                          | 20      | 24          | 56     |
| There was too much information                        | 16      | 32          | 52     |
| I'd have preferred more time for talking and exchange | 48      | 32          | 20     |

13  
14 *Note.* †  $p \leq 0.1$ , \*  $p < 0.05$ , \*\*\*  $p < 0.001$ .

15  
16  
17  
18 Table 6.

19 *Top 10 ranking of subjectively perceived active treatment factors (N = 26).*

| Rank | Treatment factor                             | <i>n counts</i> | <i>% of all participants</i> |
|------|----------------------------------------------|-----------------|------------------------------|
| 1.   | Weekly lectures                              | 23              | 89                           |
| 2.   | Increase of positive thoughts                | 20              | 77                           |
| 3.   | Restructuring of negative thoughts           | 19              | 73                           |
| 4.   | Computer and multimedia use                  | 18              | 69                           |
| 4.   | Trainer (social and professional skills)     | 18              | 69                           |
| 6.   | Group (coherence and interpersonal learning) | 17              | 65                           |
| 6.   | Positive activities                          | 17              | 65                           |
| 8.   | Reflexion                                    | 16              | 62                           |
| 9.   | Mindfulness exercises                        | 14              | 54                           |
| 9.   | Exercises on resources and strengths         | 14              | 54                           |

22  
23  
24  
25  
26  
27  
28  
29  
30  
31  
32  
33  
34  
35  
36 *Note:* *n counts* = number of counts associated with a specific treatment factor; *% of all participants* = proportion of all participants  
37  
38  
39  
40  
41  
42  
43

44 Figure legend:

45  
46 Figure 1. Study's flow chart  
47  
48  
49  
50  
51  
52  
53  
54  
55  
56  
57  
58  
59  
60

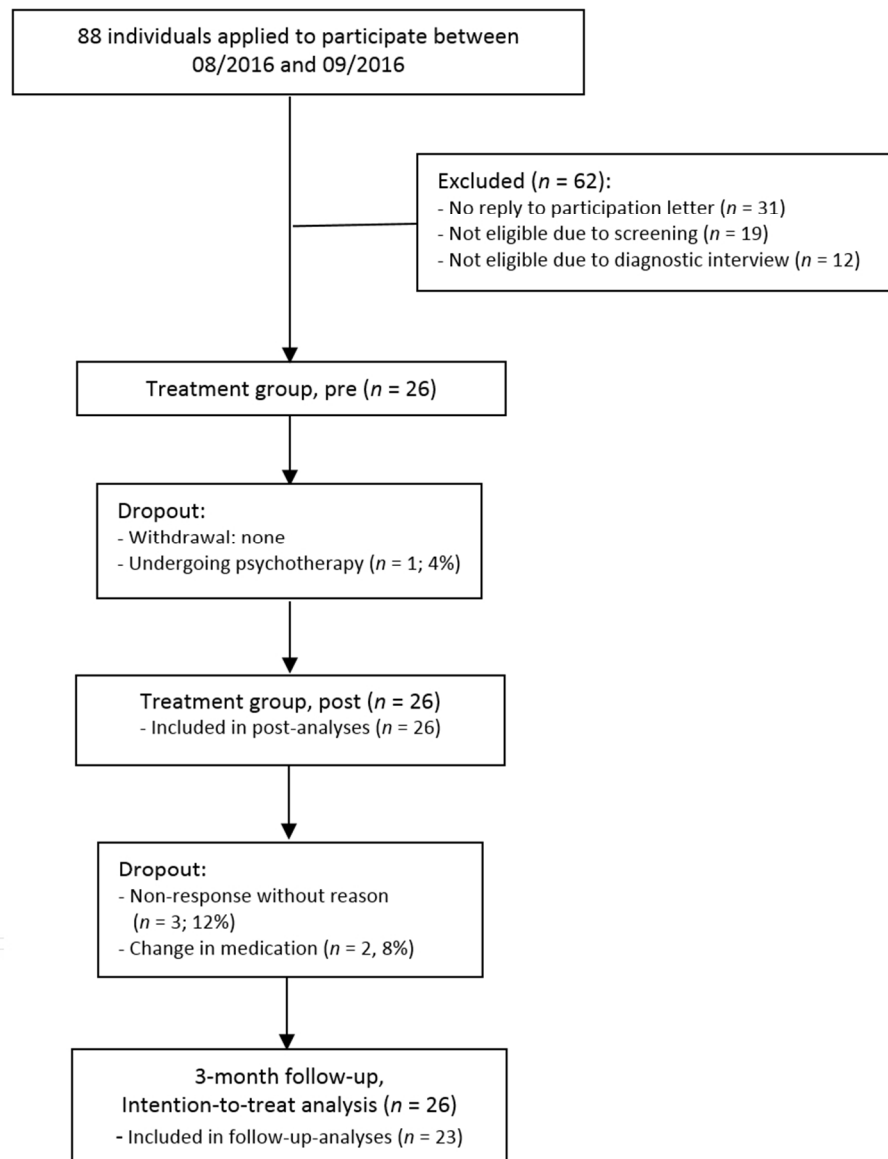

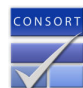

## CONSORT 2010 checklist of information to include when reporting a randomised trial\*

| Section/Topic                    | Item No | Checklist item                                                                                                                                                                              | Reported on page No      |
|----------------------------------|---------|---------------------------------------------------------------------------------------------------------------------------------------------------------------------------------------------|--------------------------|
| <b>Title and abstract</b>        |         |                                                                                                                                                                                             |                          |
|                                  | 1a      | Identification as a randomised trial in the title                                                                                                                                           | <u>uncontrolled</u>      |
|                                  | 1b      | Structured summary of trial design, methods, results, and conclusions (for specific guidance see CONSORT for abstracts)                                                                     | <u>yes, page 2</u>       |
| <b>Introduction</b>              |         |                                                                                                                                                                                             |                          |
| Background and objectives        | 2a      | Scientific background and explanation of rationale                                                                                                                                          | <u>yes, page 4</u>       |
|                                  | 2b      | Specific objectives or hypotheses                                                                                                                                                           | <u>yes, page 5&amp;6</u> |
| <b>Methods</b>                   |         |                                                                                                                                                                                             |                          |
| Trial design                     | 3a      | Description of trial design (such as parallel, factorial) including allocation ratio                                                                                                        | <u>no, one-armed</u>     |
|                                  | 3b      | Important changes to methods after trial commencement (such as eligibility criteria), with reasons                                                                                          | <u>none</u>              |
| Participants                     | 4a      | Eligibility criteria for participants                                                                                                                                                       | <u>yes, page 6&amp;7</u> |
|                                  | 4b      | Settings and locations where the data were collected                                                                                                                                        | <u>yes, page 6</u>       |
| Interventions                    | 5       | The interventions for each group with sufficient details to allow replication, including how and when they were actually administered                                                       | <u>yes, page 6</u>       |
| Outcomes                         | 6a      | Completely defined pre-specified primary and secondary outcome measures, including how and when they were assessed                                                                          | <u>yes, page 7&amp;8</u> |
|                                  | 6b      | Any changes to trial outcomes after the trial commenced, with reasons                                                                                                                       | <u>none</u>              |
| Sample size                      | 7a      | How sample size was determined                                                                                                                                                              | <u>yes, page 9</u>       |
|                                  | 7b      | When applicable, explanation of any interim analyses and stopping guidelines                                                                                                                | <u>none</u>              |
| Randomisation:                   |         |                                                                                                                                                                                             |                          |
| Sequence generation              | 8a      | Method used to generate the random allocation sequence                                                                                                                                      | <u>none</u>              |
|                                  | 8b      | Type of randomisation; details of any restriction (such as blocking and block size)                                                                                                         | <u>none</u>              |
| Allocation concealment mechanism | 9       | Mechanism used to implement the random allocation sequence (such as sequentially numbered containers), describing any steps taken to conceal the sequence until interventions were assigned | <u>none</u>              |
| Implementation                   | 10      | Who generated the random allocation sequence, who enrolled participants, and who assigned participants to interventions                                                                     | <u>none</u>              |
| Blinding                         | 11a     | If done, who was blinded after assignment to interventions (for example, participants, care providers, those                                                                                | <u>none</u>              |

|    |                          |     |                                                                                                                  |                           |
|----|--------------------------|-----|------------------------------------------------------------------------------------------------------------------|---------------------------|
| 1  |                          |     |                                                                                                                  |                           |
| 2  |                          |     | assessing outcomes) and how                                                                                      | <u>none</u>               |
| 3  |                          |     |                                                                                                                  |                           |
| 4  |                          | 11b | If relevant, description of the similarity of interventions                                                      | <u>none</u>               |
| 5  | Statistical methods      | 12a | Statistical methods used to compare groups for primary and secondary outcomes                                    | <u>yes, page 8&amp;9</u>  |
| 6  |                          | 12b | Methods for additional analyses, such as subgroup analyses and adjusted analyses                                 | <u>none</u>               |
| 7  |                          |     |                                                                                                                  |                           |
| 8  | <b>Results</b>           |     |                                                                                                                  |                           |
| 9  | Participant flow (a      | 13a | For each group, the numbers of participants who were randomly assigned, received intended treatment, and         |                           |
| 10 | diagram is strongly      |     | were analysed for the primary outcome                                                                            | <u>yes, page 9&amp;21</u> |
| 11 | recommended)             | 13b | For each group, losses and exclusions after randomisation, together with reasons                                 | <u>yes, page 9&amp;21</u> |
| 12 | Recruitment              | 14a | Dates defining the periods of recruitment and follow-up                                                          | <u>yes, page 9&amp;21</u> |
| 13 |                          | 14b | Why the trial ended or was stopped                                                                               | <u>yes, page 6/7</u>      |
| 14 | Baseline data            | 15  | A table showing baseline demographic and clinical characteristics for each group                                 | <u>yes, page 9&amp;22</u> |
| 15 | Numbers analysed         | 16  | For each group, number of participants (denominator) included in each analysis and whether the analysis was      |                           |
| 16 |                          |     | by original assigned groups                                                                                      | <u>yes, page 9&amp;22</u> |
| 17 |                          |     |                                                                                                                  |                           |
| 18 | Outcomes and             | 17a | For each primary and secondary outcome, results for each group, and the estimated effect size and its            |                           |
| 19 | estimation               |     | precision (such as 95% confidence interval)                                                                      | <u>yes, page 9&amp;22</u> |
| 20 |                          | 17b | For binary outcomes, presentation of both absolute and relative effect sizes is recommended                      | <u>none</u>               |
| 21 | Ancillary analyses       | 18  | Results of any other analyses performed, including subgroup analyses and adjusted analyses, distinguishing       |                           |
| 22 |                          |     | pre-specified from exploratory                                                                                   | <u>none</u>               |
| 23 |                          |     |                                                                                                                  |                           |
| 24 | Harms                    | 19  | All important harms or unintended effects in each group (for specific guidance see CONSORT for harms)            | <u>yes, page 9</u>        |
| 25 |                          |     |                                                                                                                  |                           |
| 26 | <b>Discussion</b>        |     |                                                                                                                  |                           |
| 27 | Limitations              | 20  | Trial limitations, addressing sources of potential bias, imprecision, and, if relevant, multiplicity of analyses | <u>yes, page 13</u>       |
| 28 | Generalisability         | 21  | Generalisability (external validity, applicability) of the trial findings                                        | <u>yes, page 13</u>       |
| 29 | Interpretation           | 22  | Interpretation consistent with results, balancing benefits and harms, and considering other relevant evidence    | <u>yes, page 11-13</u>    |
| 30 |                          |     |                                                                                                                  |                           |
| 31 | <b>Other information</b> |     |                                                                                                                  |                           |
| 32 | Registration             | 23  | Registration number and name of trial registry                                                                   | <u>yes, page 6</u>        |
| 33 | Protocol                 | 24  | Where the full trial protocol can be accessed, if available                                                      | <u>yes, page 6</u>        |
| 34 | Funding                  | 25  | Sources of funding and other support (such as supply of drugs), role of funders                                  | <u>yes, page 13</u>       |
| 35 |                          |     |                                                                                                                  |                           |

36

37 \*We strongly recommend reading this statement in conjunction with the CONSORT 2010 Explanation and Elaboration for important clarifications on all the items. If relevant, we also

38 recommend reading CONSORT extensions for cluster randomised trials, non-inferiority and equivalence trials, non-pharmacological treatments, herbal interventions, and pragmatic trials.

39 Additional extensions are forthcoming: for those and for up to date references relevant to this checklist, see [www.consort-statement.org](http://www.consort-statement.org).

40

41

# BMJ Open

## Feasibility of a blended group intervention (bGT) for major depression: Uncontrolled interventional study in a university setting

|                                 |                                                                                                                                                                                                                                                                                                                                                                                                                                                                                                                                                                                                                                                          |
|---------------------------------|----------------------------------------------------------------------------------------------------------------------------------------------------------------------------------------------------------------------------------------------------------------------------------------------------------------------------------------------------------------------------------------------------------------------------------------------------------------------------------------------------------------------------------------------------------------------------------------------------------------------------------------------------------|
| Journal:                        | <i>BMJ Open</i>                                                                                                                                                                                                                                                                                                                                                                                                                                                                                                                                                                                                                                          |
| Manuscript ID                   | bmjopen-2017-018412.R2                                                                                                                                                                                                                                                                                                                                                                                                                                                                                                                                                                                                                                   |
| Article Type:                   | Research                                                                                                                                                                                                                                                                                                                                                                                                                                                                                                                                                                                                                                                 |
| Date Submitted by the Author:   | 21-Dec-2017                                                                                                                                                                                                                                                                                                                                                                                                                                                                                                                                                                                                                                              |
| Complete List of Authors:       | Schuster, Raphael; Universitat Salzburg, Department of Psychology<br>Fichtenbauer, Isabelle; Universitat Wien Fakultat fur Psychologie,<br>Department of Applied Psychology: Health, Development and Promotion<br>Sparr, Verena Maria; Universitat Wien Fakultat fur Psychologie,<br>Department of Applied Psychology: Health, Development and Promotion<br>Berger, Thomas; University of Bern , Department of Clinical Psychology<br>and Psychotherapy<br>Laireiter, Anton-Rupert; Universitat Salzburg, Department of Psychology;<br>Universitat Wien Fakultat fur Psychologie, Department of Applied<br>Psychology: Health, Development and Promotion |
| <b>Primary Subject Heading</b>: | Mental health                                                                                                                                                                                                                                                                                                                                                                                                                                                                                                                                                                                                                                            |
| Secondary Subject Heading:      | Public health, Health informatics                                                                                                                                                                                                                                                                                                                                                                                                                                                                                                                                                                                                                        |
| Keywords:                       | Blended Therapy, Blended Group Therapy, Online Interventions, Group Therapy, Depression, Therapeutic factors                                                                                                                                                                                                                                                                                                                                                                                                                                                                                                                                             |
|                                 |                                                                                                                                                                                                                                                                                                                                                                                                                                                                                                                                                                                                                                                          |

SCHOLARONE™  
Manuscripts

1  
2  
3 Feasibility of a blended group intervention (bGT) for major depression: Uncontrolled interventional  
4 study in a university setting  
5

6 Raphael Schuster<sup>1</sup>, Isabelle Fichtenbauer<sup>2</sup>, Verena Sparr<sup>2</sup>, Thomas Berger<sup>3</sup>, Anton-Rupert Laireiter<sup>1,2</sup>  
7  
8  
9

10  
11 1. Department of Psychology, University of Salzburg  
12

13  
14 2. Department of Applied Psychology: Health, Development and Promotion, Faculty of Psychology,  
15 University of Vienna  
16

17  
18 3. Department of Clinical Psychology and Psychotherapy, University of Bern  
19  
20  
21

22 \*Corresponding author:  
23

24 Raphael Schuster, MSc.  
25

26 Fachbereich Psychologie, Universität Salzburg  
27

28 Hellbrunnerstraße 34, 5020 Salzburg, Österreich  
29

30 raphael.schuster@sbg.ac.at  
31  
32  
33  
34  
35  
36  
37  
38  
39  
40  
41  
42  
43  
44  
45  
46  
47  
48  
49  
50  
51  
52  
53  
54  
55  
56  
57  
58  
59  
60

## Abstract

**Objective:** This study investigated the feasibility of a novel blended (face-to-face and computer-based) group intervention for the reduction of depressive symptoms in major depression.

**Design:** Patient-centred uncontrolled interventional study.

**Setting:** University setting in a general community sample. A multi-modal recruitment strategy (public health centres and public areas) was applied.

**Participants:** Based on independent interviews, 26 participants, diagnosed with major depressive disorder (81 % female; 23 % comorbidity > 1, 23 % comorbidity > 2), entered treatment.

**Intervention:** Acceptance and mindfulness-based, as well as self-management and resource-oriented psychotherapy principles served as the theoretical basis for the low-threshold intervention. The blended format included face-to-face sessions, complemented with multimedia presentations and a platform featuring videos, online work sheets, an unguided group-chat, as well as remote therapist-patient communication.

**Main outcome measures:** The Center for Epidemiological Studies-Depression scale (CES-D) and the twelve-item General Health Questionnaire (GHQ-12).

**Results:** Large to very large within group effect sizes were found on self-reported depression ( $F_{(2, 46.37)} = 25.69, p < .001; d = 1.80$ ), general health ( $F_{(2, 46.73)} = 11.47, p < .001; d = 1.32$ ), personal resources ( $F_{(2, 43.36)} = 21.17, p < .001; d = 0.90$ ) and mindfulness ( $F_{(2, 46.22)} = 9.40, p < .001; d = 1.12$ ) after a follow-up period of three months. Treatment satisfaction was high and 69 % ranked computer and multimedia use as a therapeutic factor. Furthermore, participants described treatment intensification as important advantage of the blended format. Half of patients (48 %) would have preferred more time for personal exchange.

**Conclusion:** The investigated blended group format seems feasible for the reduction of depressive symptoms in major depression. The development of blended interventions can benefit from assuring that highly structured treatments actually meet patients' needs. As a next step, the intervention should be tested in comparative trials in routine care.

**Trial registration:** DRKS-ID: DRKS00010894



### Strengths and limitations of this study

- This is the first clinical study on blended group therapy (bGT) for major depression. This innovative intervention combines two low intensity psychosocial interventions, recommended by the National Institute for Health and Care Excellence.
- Participant selection was based on a multi-modal recruitment strategy and comorbidity was high. Data on adverse effects are provided.
- This is the first study to apply standardised measures of client satisfaction and system usability in bGT. Additionally, it provides a detailed view on participants' appraisals of the new format.
- The study entails a conceptual replication of previous findings on subjectively perceived therapeutic factors.
- The uncontrolled study-design and the university setting restrict the interpretability of results.

### DATA SHARING STATEMENT

We also assessed 5 short scales at pre-measurement. These short scales will be accumulated over different studies and serve as moderators of treatment success and online user behaviour. All data can be obtained by contacting the first or the last author of this study and will be readily shared.

### CONTRIBUTOR SHIP STATEMENT

*Raphael Schuster:* design, acquisition, analysis, drafting, revising  
*Verena Sparr:* acquisition, analysis  
*Isabelle Fichtenbauer:* acquisition, analysis  
*Thomas Berger:* drafting and revising  
*Anton-Rupert Laireiter:* design, drafting and revising

## 1. Introduction

Depression presents a relevant public health concern and imposes high costs on society as well as on health systems [1]. Therefore, research priorities include health policy and system research, in particular, how to deliver cost-effective interventions in a low-resource context [2, 3]. Psychological online interventions have been found effective in reducing common mental health disorders, e.g. depression [4] and anxiety [5], in such low-resource contexts.

Online interventions offer many advantages; they can provide access to evidence-based treatments and patients can work through the intervention whenever they want [6]. Usually anonymity is preserved as patients participate at distance, resulting in low social barriers and low risk of stigmatization [7]. From a health suppliers perspective online interventions guarantee standardized treatments and show good scalability, which has led to the launch of the first online clinics [8, 9]. Internet-based interventions can also help with bridging waiting times [10] or enhance treatment effects during aftercare [11]. At the same time, online interventions do not fit all patients' needs (e.g. need for more personal contact or diverging preferences). Consequently, classical face-to-face therapy will remain an important basis of mental health care. That being said, tools and methods developed in online therapy can be integrated into various forms of face-to-face therapy [12].

Due to the variety of possible combinations it remains difficult to define blended interventions concisely. Van der Vaart and colleagues [13] describe blended therapy as "[... ] *a combination of online and face-to-face therapy, in which online sessions replace or substitute some (parts) of the sessions with a health professional [...]*. According to Kooistra and colleagues [14], the combination of both intervention strategies should merge into one integrated treatment format. In our study's context, new media was also used as a supportive in-session tool (e.g. multimedia presentations and videos). Thus, we define blended therapy as an integrated combination of face-to-face sessions with computer or app support. It aims at improving the delivery of evidence-based therapy methods and results in a possible acceleration or intensification of treatment. The online part of blended interventions often entails psychoeducation, online exercises and remote therapist feedback on accomplished exercises, as well as mobile diaries or monitoring [15]. Interventions are usually delivered via online platforms [16] or applications for mobile phones [17].

Blended therapy is at an early stage of research - even though first studies date back to the 1980s and 1990s [18-20]. At that time, computer support had been found to be useful in the treatment of depression, anxiety or obsessive compulsive disorders [20]. However, these early studies do not adequately account for the rapid development modern technologies have undergone, and user-behaviour has changed dramatically since then. When examining more recent literature, good ac-

1  
2  
3 ceptability and compatibility with standard treatments are found [21]. Additionally, computer-  
4 assisted programs may well shorten treatment duration while maintaining observed treatment ef-  
5 fects [22]. In Europe, research on blended therapy currently is on the rise, as a multicentre study (E-  
6 COMPARED) investigates possible time savings in routine care [23]. From a therapy process perspec-  
7 tive, Månsson and colleagues [16] suggest that blended interventions could foster adherence to evi-  
8 dence based treatment rationales, because the structure provided by blended therapy might prevent  
9 therapists from so called therapist drift [24]. Regarding implementation of blended therapy, the  
10 Netherlands seem to be Europe's most promotive nation [25]. According to Netherlands' leading  
11 software provider (Minddistrict) more than 17.000 professionals and 120.000 patients are currently  
12 using some of their blended services [26].  
13  
14  
15  
16  
17  
18

19 With little exceptions, research on blended interventions has its primary focus on individual therapy  
20 and little is known about the potential for group treatments. As it is a recommended treatment in  
21 health guidelines and national health policies [27, 28], group therapy has various applications in in-  
22 and outpatient clinics [29]. For example, the National Institute for Health and Care Excellence [30]  
23 recommends group cognitive behavioural therapy (CBT) for people with mild to moderate depression  
24 who decline other low intensity psychosocial interventions, such as computerized cognitive behav-  
25 ioural therapy (cCBT). Therefore, the integration of computer support and face-to-face group ses-  
26 sions might result in an optimized treatment, in which personal contact is preserved. Existing blend-  
27 ed group therapy (bGT) studies reveal high acceptability for the treatment of anxiety disorders and  
28 suggest possible savings of therapist time [31-33]. To achieve savings, typical standard treatments  
29 (12 – 14 session) are shortened by 33 - 57 % (6 – 8 sessions). Apart from potential savings, bGT allows  
30 new ways of therapist-to-client and client-to-client interaction, such as online supervision of home-  
31 work tasks or gamification [34].  
32  
33  
34  
35  
36  
37  
38  
39

40 Literature on bGT for depression remains scarce, as there do not exist any published articles prior to  
41 our first proof-of-concept study [35]. Due to the demand for low-threshold treatments [36], we de-  
42 signed a CBT-based psychoeducational intervention entailing principles of resource-oriented psycho-  
43 therapy and self-management therapy. Resource-oriented psychotherapy focuses on current con-  
44 cerns and tries to strengthen personal skills in order to achieve set goals [37]. Self-management ther-  
45 apy has a long tradition in the treatment of depression [38], and elements such as behavioural goal  
46 setting or activity monitoring are frequently applied in blended interventions [39, 40]. Finally, psy-  
47 choeducational cognitive behavioural group therapy has recently been applied in a stepped care ser-  
48 vice model [41] within the *Improving Access to Psychological Therapies* (IAPT) programme. In our first  
49 study [35], high treatment effects were observed in an adult sample, exhibiting a variety of unspeci-  
50 fied depressive symptoms. Further, participants rated online and multimedia elements as equally  
51  
52  
53  
54  
55  
56  
57  
58  
59  
60

1  
2  
3 relevant as group experience or specific CBT techniques. In an open evaluation, 25 % freely described  
4 online and multimedia support as a therapeutic factor. However, the absence of a systematic diag-  
5 nostic procedure and the lack of standardised measures (e.g. client satisfaction and system usability)  
6 restrict the generalisability of findings.  
7  
8

9  
10 The present study addresses these limitations by applying the developed blended group intervention  
11 to a sample of clinically depressed adults, and by evaluating its usefulness in a more structured and  
12 standardized way. Moreover, we analysed system usage and corresponding changes over the course  
13 of time. Lastly, the study provides a detailed view on participants' appraisals of the new format.  
14  
15

## 16 17 **2. Methods**

### 18 19 **2.1 Procedure**

20  
21 The clinical one-arm interventional study was approved by the local ethics committee (Ethical Review  
22 Board, University of Vienna, Ref-Nr:00194) and registered at the German clinical trial register (DRKS-  
23 ID: DRKS00010894). Eligible persons were called and informed consent was obtained verbally by two  
24 independent interviewers. Subsequently, the complete Mini-DIPS was applied for study in- or exclu-  
25 sion [42]. The Mini-DIPS is a 30-minute short version of the German DIPS (Diagnostic Interview for  
26 Psychological Disorders) [43], based on ICD-10 depression criteria. Ten days before the intervention  
27 started, eligible participants ( $N = 26$ ) were required to complete an online questionnaire of self-  
28 report measures. Sessions were held in a double trainer format by two trained and supervised psy-  
29 chologists (VS & IL), both in the final year of their Master studies of clinical psychology. Both trainers  
30 had prior experience with conducting group therapy in clinical settings. Sessions took place in a spe-  
31 cially equipped seminar room at the University of Vienna, Faculty of Psychology (Department of Ap-  
32 plied Psychology: Health, Development and Promotion). At the beginning of the first group session,  
33 written informed consent was signed by all participants. One week after the intervention ended, an  
34 online post-evaluation questionnaire was completed and follow-up data was obtained three months  
35 later.  
36  
37

### 38 39 **2.2 Intervention**

40  
41 The treatment comprised a 7-week intensive CBT-based psychoeducation and self-management  
42 group intervention, in which personal sessions (90 minutes) alternated with online exercises and  
43 remote therapist feedback. CBT-based key techniques eclectically entailed mindfulness, acceptance  
44 and commitment therapy, cognitive strategies for negative thoughts, as well as a special emphasis on  
45 time- and self-management, and minor elements of positive psychology. The intervention focused on  
46 the reduction of depressive symptoms and aimed at increasing personal resources and self-  
47 management abilities. We carefully regarded best practice guidelines for empirically supported CBT  
48  
49  
50  
51  
52  
53  
54  
55  
56  
57  
58  
59

group treatments of depression (e.g. psychoeducation, behavioural goal setting, cognitive restructuring, relapse prevention, and double trainer setting) during the design of the intervention [44]. Online modules were made accessible via a secure web-based non-profit environment (Moodle with SSL-VPN access), featuring videos, online work sheets, an unguided group-chat, as well as remote therapist-patient communication. Accomplishing one online session took approximately 50 - 70 minutes (34 minutes of weekly videos included). The platform automatically tracked personal log data for each participant and week. Group sessions were supported by multimedia, e.g. psychoeducational short clips and PowerPoint presentations. Participants were also able to logon the platform after the group sessions had ended. The basic intervention is described comprehensively in our preceding study [35]. Improvements are in regards to the psychoeducation section and the weekly diary as well as putting more emphasis on cognitive restructuring techniques. Detailed information on weekly modules is presented in *Table 1*.

### 2.3 Participant recruitment and selection

The study was advertised online (e.g. [www.depression.at](http://www.depression.at)) and by handing out flyers in public health centres and populated public areas, such as urban pedestrian areas in Vienna. All those interested were invited to visit the study webpage and to fill out an online participation form. Recruitment ended after sufficient participants had been acquired.

#### Inclusion and exclusion criteria

Two independent psychologists with clinical experience conducted the diagnostic interviews. Participants aged between 18 – 65, familiar with the use of personal computers and suffering from mild to moderate levels of major depression and/or dysthymia and/or mild to moderate comorbid anxiety were eligible for the study. According to clinical judgement, participants were excluded if they suffered from severe depression ( $\geq 7$  criteria, including main symptoms), severe anxiety disorder, bipolar disorder, schizoaffective disorder, severe psychiatric and psychotic conditions, substance abuse, suicidal ideation, or if they exhibited low German-language and/or computer skills. Participants were also excluded if they were currently undergoing psychotherapy. Psychiatric medication was tolerated, but had to be kept constant for at least three months prior to study onset. *Figure 1* presents the flowchart, demonstrating the recruitment and research procedure in detail.

### 2.4 Measures

#### 2.4.1 Primary outcome

The primary outcome, reduction of depressed mood, was measured by the short form of the German translation of the CES-D, Center for Epidemiological Studies-Depression scale [45]. This questionnaire

1  
2  
3 assesses depression associated emotions and motor functions, as well as interactive, cognitive and  
4 somatic symptoms on a 16-item 4-step Likert-scale. Higher scores indicate higher levels of depression  
5 and the German version's cut-off value (CES-D > 17) has high discriminative validity [45]. The reliabil-  
6 ity of the CES-D has been shown to be excellent [46]. Cronbach's alpha in the present study was .84.  
7  
8

#### 9 10 2.4.2 Secondary outcome measures

11  
12 The General Health Questionnaire (GHQ-12) [47] was selected to assess the degree of self-reported  
13 psychological distress. Items are rated on a 4-step bi-modal scale (0-0-1-1) with higher scores indicat-  
14 ing higher levels of psychological distress. The GHQ-12 has shown satisfactory reliability [48] and  
15 good intercultural validity [49]. A cut-off of > 1 served as a conservative measure with highest sensi-  
16 tivity and specificity in literature [50]. Cronbach's alpha was .83.  
17  
18

19  
20  
21 The German "Fragebogen zur Erfassung von Ressourcen und Selbstmanagementfähigkeiten –  
22 Gesamtressourcen" (FERUS, Questionnaire for the Assessment of Resources and Self-Management  
23 Abilities – common resources) [51], consisting of the subscales "coping", "self-awareness", "self-  
24 efficacy", "self-verbalisation", and "hope" (44 items, 7-point Likert-scales), was applied for the as-  
25 sessment of personal resources. Higher scores represent higher levels of self-rated personal re-  
26 sources. In the present study Cronbach's alpha of the total resources was .95.  
27  
28

29  
30  
31 The Mindful Attention Awareness Scale (MAAS) [52] assesses the frequency of mindful states, with  
32 higher levels indicating greater mindful awareness (15 items, 6-point Likert scale). We used a 6-item  
33 short version of the German MAAS [53] and Cronbach's alpha in the present study was .83.  
34  
35

#### 36 37 2.4.3 Client satisfaction and system usability

38  
39 Usability of online and multimedia elements was assessed by the System Usability Scale (SUS) [54].  
40 The SUS is a technology-neutral robust tool for assessing the quality of a given user interface. Empiri-  
41 cally derived cut-off scores are graded from SUS > 85.5 (excellent usability) to SUS >71.4 (good usabil-  
42 ity) and SUS > 50.9 (acceptable usability) on a 10-item 5-point Likert scale [55]. Cronbach's alpha for  
43 the current sample was .85.  
44  
45

46  
47 Participants' overall satisfaction with the treatment was measured by the German version (ZUF-8)  
48 [56] of the Client Satisfaction Questionnaire (CSQ-8) [57]. This widely used questionnaire addresses  
49 several aspects of service satisfaction and is based on an 8-item 4-point Likert scale. In this study  
50 Cronbach's alpha was .88.  
51  
52

#### 53 54 2.4.4 Appraisal of new media elements, applicability and process aspects

55  
56  
57  
58  
59  
60

1  
2  
3 Appraisal of new media elements, applicability, and process aspects of the intervention were as-  
4 sessed by a self-designed questionnaire (55 items) at post-treatment. The questionnaire comprised 9  
5 items on intervention elements, 6 items on specific functions (e.g. online platform), 6 items on satis-  
6 faction and perceived efficacy of the intervention, one ranking of perceived therapeutic factors [35],  
7 16 items on optimal blend, intensity and duration [13], 9 items on mode of delivery (face-to-face or  
8 online) [13], and 8 items on perceived (dis-)advantages of blended therapy.

## 12 13 **2.5 Statistical Analyses**

14  
15 Statistical analyses were carried out using SPSS 24 [58]. Significant pre- to follow-up changes were  
16 analysed by linear mixed models (LMM), with restricted maximum likelihood estimation (REML) and  
17 compound symmetry as covariance type. Missing values on outcome measures were analysed in  
18 agreement with the intention to treat principle (ITT). Individual pre- to follow-up differences served  
19 as basis for the reliable change indexes (RCI) [59] and we used internal consistency as a measure for  
20 RCI reliability [60], resulting in a reliable change criterion of 7.22 scale points for the CES-D and 2.62  
21 scale points for the GHQ-12. Additionally, participants were deemed to have undergone clinically  
22 significant improvement (CSI) when simultaneously exhibiting reliable change and scoring below CES-  
23 D or GHQ-12 post measurement cut-off ( $CES-D \leq 17$ ;  $GHQ-12 > 1$ ). Within-group effect sizes were  
24 calculated with pooled standard deviation and reported in Cohen's  $d$  [61]. Power analysis was carried  
25 out using G\*Power [62], resulting in an estimated sample size of  $N = 22$ , for a conservative medium  
26 within-subjects effect size of  $d = 0.65$  (alpha-error  $\alpha = .05$ , power  $\beta = .90$ ). Differences in appraisals of  
27 intervention elements (section 3.3.1) were calculated by t-tests (comparing against grand average),  
28 and for intervention applicability (Questions 2 and 3 in section 3.3.2) and process aspects (section  
29 3.3.3) paired t-tests were applied.

## 30 31 32 33 34 35 36 37 38 39 40 **3. Results**

### 41 42 3.1 Sample characteristics

43  
44 There were no dropouts during the treatment period, but three participants did not fill out the fol-  
45 low-up evaluation. Two patients reported changes in medication and one patient commenced psy-  
46 chotherapy. According to ITT-principles, those patients remained in the analyses. According to the  
47 CONSORT guidelines, detailed information on participants' flow can be gained from *Figure 1*. Women  
48 constituted the majority of the sample (81 %) and education was high (54 % tertiary education). Par-  
49 ticipants' age ranged from 23 to 51 ( $M = 33.9$ ,  $SD = 7.5$ ). A comprehensive overview of participant  
50 characteristics can be gained from *Table 2*.

#### 51 52 53 54 55 3.2.1 Primary and secondary outcome measures



All outcome measures indicated significant changes and effect sizes were large to very large (see *Table 3*). For the primary outcome measure CES-D, a statistically significant reduction of self-reported depressive symptoms was found, F-value of  $F_{(2, 46.37)} = 25.69$ ,  $p < .001$ . Regarding secondary outcome measures, self-reported psychological distress, assessed by the GHQ-12, significantly decreased  $F_{(2,46.73)} = 11.47$ ,  $p < .001$ . Furthermore, personal resources (FERUS) significantly increased,  $F_{(2,43.36)} = 21.17$ ,  $p < .001$ , as well as the frequency of mindful states (MAAS),  $F_{(2,46.22)} = 9.40$ ,  $p < .001$ . At follow-up, a proportion of 70 % of patients exhibited clinically significant improvement (CSI) for depressive symptoms and CSI for general health was observed in 75 %. One participant deteriorated reliably (4 %). Detailed information on observed means, standard deviations, effect sizes and reliable change is depicted in *Table 3*.

### 3.2.2 Client satisfaction and system usability

Usability of online and multimedia elements, assessed by the System Usability Scale (SUS) [54], unveiled an average usability of 85.3 ( $SD = 14.49$ ) on a 100-point scale. Highest quality ratings (excellent usability,  $SUS > 85$ ) were given by 56 % and another 24 % of participants rated the platform usability as “good” ( $SUS > 72$ ). One participant (4 %) rated the usability as “low” ( $SUS < 51$ ). Clients’ service satisfaction was measured by the Client Satisfaction Questionnaire (CSQ-8) [57], and average satisfaction was 27.4 ( $SD = 3.9$ ) of 32 possible scale points, indicating “good” client satisfaction. On item-level ( $M = 3.43$ ), an average rating of 3 indicates clients being “somewhat satisfied” and a rating of 4 scale points translates into “very satisfied”. Here, 84 % of participants gave ratings  $\geq 3$  scale points.

### 3.3 Appraisal of new media elements, applicability and process aspects

To explore participants’ retrospective perception of new media elements, as well as applicability and process aspects of the blended format, an additional self-designed questionnaire was applied.

#### 3.3.1 Appraisal of new media elements and usage data

The results in *Table 4* show that computer and multimedia support were generally described as helpful ( $M = 5.16$  on 6-step Likert-type scale). Almost half of the participants described in-session multimedia use, between-session communication with the therapist, weekly psychoeducational videos and the online platform as very helpful, whilst a smaller proportion found them of little or no help. Interestingly, participants described group interaction as marginally less relevant compared to computer and multimedia. However, the only clear deviation from average was a lower rating for the unguided discussion forum. *Table 4* also provides descriptive statistics on logins and downloads, where a continuous decrease in activity can be identified over the course of the treatment.

#### 3.3.2 Applicability of the blended intervention



1  
2  
3 *Table 5* depicts participants' appraisals of the blended format and the influence of computer support  
4 on therapeutic process aspects in general, as well as preferred treatment duration. The majority (84  
5 %) stated that they would not leave out computer support and that this support has the potential to  
6 improve (80 %) and intensify group therapy (72 %). For our participants, blending best fitted the  
7 needs of training-alike groups. Here 96 % agreed, that blended interventions could help improve and  
8 intensify (88 %) existing rationales. The applicability-rating of blended interventions for individual  
9 therapy was clearly less positive (48 %), while prior therapy experience (54%) did not predict this  
10 appraisal ( $r = 0.116, p = 0.580$ ). With a median of 12 - 15 sessions, preferred treatment duration was  
11 50 % - 100 % higher than the actual treatment duration (7 weeks).

### 12 13 14 15 16 17 18 3.3.3 Process aspects

19  
20 Statements on process aspects of the intervention entailed issues regarding perceived flexibility,  
21 structure, information, and group interaction (*Table 5*). A small proportion of investigated partici-  
22 pants perceived applied computer and multimedia support as restricting or hindering (16 – 20 %).  
23 With a proportion of one quarter to one third, a group of indecisive participants existed. 48 % of par-  
24 ticipants expressed a desire for more group interaction and discussion time. In the ranking of subjec-  
25 tively perceived therapeutic factors, 69 % of participants (rank 4 of 21) described in- and intersession  
26 computer and multimedia use as an important therapeutic factor (*Table 6*).

## 27 28 29 30 31 32 33 34 **4. Discussion**

35  
36 This feasibility study presents a user-centred evaluation of a recently developed blended group inter-  
37 vention for the reduction of depressive symptoms in major depression. Results indicate a high fit  
38 between psychological groups and blended components in terms of client satisfaction, system usabil-  
39 ity, and the perceived relevancy of supportive computer and multimedia elements. Besides the  
40 standardised assessment of system usability and client satisfaction, the study entails a detailed view  
41 on blended elements, including possible improvements.

42  
43  
44  
45  
46  
47 Corresponding primary outcome measures of the study indicate substantial effects on self-reported  
48 depressive symptoms and on general health. Compared to other psychoeducational group CBT inter-  
49 ventions [41], observed reductions of self-reported depressiveness and rates of clinically significant  
50 improvement can be classified as high. According to resource-oriented psychotherapy principles [39,  
51 51], participants also reported strengthened personal resources and self-management abilities (sec-  
52 tion 3.2.1). Results were maintained over a 3-month follow-up period. There was no withdrawal and  
53  
54  
55  
56  
57  
58  
59  
60

1  
2  
3 only one participant deteriorated reliably (4 %). These findings support prior literature on blended  
4 therapy [16, 32], and underpin the potential of technology for psychological group interventions.

5  
6 Regarding client satisfaction and system usability, participants provided positive evaluations of the  
7 investigated blended group format. For example, most patients stated that they would not leave out  
8 technology and that computer and multimedia support could help to improve existing treatments.  
9  
10 Even though more than half of the patients had received prior therapy, the appraisal was less posi-  
11 tive for individual therapy (cf. section 3.3.2). This finding can be explained by a possible sceptical  
12 preconception and lack of opposite experience [14]. It might also reflect patients' perception of dif-  
13 ferent requirements of the two settings. However, when compared to a concept study on blended  
14 individual therapy [40], system usability (SUS) and client satisfaction scores (CSQ-8) of the investigat-  
15 ed group intervention were around one standard deviation above. As blended learning originates  
16 from educational groups (e.g. teaching or corporate trainings) [63], interventions with more training-  
17 alike character may be particularly feasible for computer and multimedia support. This assumption is  
18 reflected by more positive appraisals for the improvement of training-alike interventions, compared  
19 to the improvement of classical group therapy (cf. section 3.3.2). However, the positive appraisal of  
20 treatment intensification between those forms of delivery did not differ significantly.

21  
22 The investigated intervention entailed a variety of different computer and online elements. The  
23 online discussion forum and remote patient-to-therapist communication have setting-specific  
24 relevancy as they open up additional pathways for client-to-client and client-to-therapist interaction  
25 in group therapy. While remote patient-to-therapist communication was easy to install and  
26 described as important, the unguided online discussion forum was of less relevance for our patients.  
27 According to positive findings in online chat group and gamification studies [34, 64], we conclude  
28 that online group interaction in blended interventions should either be guided by a therapist [65], or  
29 include other incentives to increase usage and perceived relevancy. During debriefing, some patients  
30 also explained, that their need for group interaction was satisfied by the weekly reunions.

31  
32 Consistent with prior results, participants related in- and intersession computer and multimedia use  
33 to the therapeutic success of the intervention (*Table 6*). In our first study [35], 25 % of participants  
34 freely described computer support as a therapeutic factor. The direct ranking presented in this study  
35 yielded a notably higher proportion of agreement and can be interpreted as a conceptual replication  
36 of previous results. Additionally, treatment intensification was described as an important advantage.  
37 Results from a forthcoming qualitative article on patients' experiences with the blended group  
38 format support present findings (personal communication by Schuster, Raphael, November 2017  
39 [66]). Regarding the interpretation, patients' appraisals might best be conceptualized as the  
40 description of a catalytic effect, which possibly fosters other established therapeutic factors, such as  
41  
42  
43  
44  
45  
46  
47  
48  
49  
50  
51  
52  
53  
54  
55  
56  
57  
58  
59

1  
2  
3 imparting information [29] or motivational clarification [37]. Even though first results from  
4 comparative studies are promising [67, 68], future research has to determine, if patients' positive  
5 appraisals translate into superior effects of blended therapy in routine care. Still, from a product  
6 development perspective, patients' connection of blended elements with treatment success can be  
7 seen as an important success criterion.  
8  
9

10  
11 Findings regarding process aspects of the blended group format revealed important patient prefer-  
12 ences. Many currently conducted studies on blended therapy investigate possible savings of thera-  
13 pist time by reducing the number of sessions (23, 31-33). From an economical point of view,  
14 potential time savings are inherently appealing for some mental health care stakeholders [25, 69]. On  
15 the other hand, short interventions might entail certain risks, such as a weakened patient-to-  
16 therapist bonding [13]. eHealth experts therefore emphasise the need for participatory research and  
17 the importance of target audience's perceptions when designing new treatments [70, 71]. As for that  
18 matter, the majority of our sample retrospectively would have preferred more group sessions (12 –  
19 15 sessions) and half of our sample required more time for group interaction during each session  
20 (cf. section 3.3.2). Development and future uptake of blended interventions may therefore benefit  
21 from assuring that highly structured or time-efficient treatment strategies actually meet the  
22 expectations of addressed patients in a particular care setting.  
23  
24  
25  
26  
27  
28  
29  
30

31 Assessed objective usage data revealed a constant decrease of webpage logins and downloads (cf.  
32 section 3.3.1). Whether this tendency indicates a relevant reduction of motivation to persist with the  
33 intervention is unclear, as satisfaction with the intervention was high and usage patterns in the first  
34 weeks can be described in terms of exaggerated activity. For example, we provided one work sheet  
35 per week for download, but the actual number of downloads was reasonably higher. In this context,  
36 Yardley and colleagues [71] critically reflect on current approaches to validly conceptualize  
37 engagement by analysing log files of system usage data. Further investigation on the significance of  
38 (dis-)continuous usage data can be carried out by small studies of iterative participatory research.  
39  
40  
41  
42  
43  
44

45 Besides the promising results of the investigated intervention, several limitations need to be consid-  
46 ered when interpreting its findings. *First*, sample size was low and the one-arm study design lacks a  
47 control condition. Thus, findings of our study have to be interpreted with limited generalization and  
48 the true magnitude of observed effects remains unclear. Also, the study design does not allow infer-  
49 ring the actual extent to which specific intervention elements (e.g. computer and multimedia ele-  
50 ments) effectively contributed to the observed effects. *Second*, participating therapists (IF and VS)  
51 lacked prior experience with the blended format, but underwent preparatory training. Careful prepa-  
52 ration and implementation as well as regular supervision seem to be critical success factors for  
53 blended interventions [72], and as some studies on online interventions show, more experience with  
54  
55  
56  
57  
58  
59  
60

1  
2  
3 a given treatment can result in better outcomes [73]. *Third*, even though clinical interviews were  
4 conducted to assess participants' psychopathological status, other properties of our sample restrict  
5 generalisability. The majority of our sample was female and relatively well educated. While compa-  
6 rable sample properties can be found in many online studies and our recruitment was based on a  
7 multi-modal recruitment strategy [74], future research has to determine, if the investigated interven-  
8 tion proves feasible for less educated or older patients. *Fourth*, compared to University of Salzburg  
9 (where the intervention was developed), the institute for applied psychology lacks a fully equipped  
10 routine outpatient clinic. As a consequence, further research in routine care is needed. *Fifth*, half of  
11 our participants lacked alternative experience with other forms of (group) therapy. Those patients'  
12 appraisals should be interpreted as positive experience with the undergone treatment, in the ab-  
13 sence of experience with possible alternatives. Additionally, the group format and the use of new  
14 media might have discouraged certain patients from participating in our study.

## 21 22 **5. Conclusions**

23  
24 The present study indicates that the blended group format is feasible for the reduction of depressive  
25 symptoms in major depression. Due to their properties, psychoeducational groups with elements of  
26 self-management or behavioural activation might be particularly suitable for blending. New media  
27 can be used for in- and intersession support and from patients' perspective, treatment intensification  
28 is described as an important advantage. Future research should investigate the feasibility and bene-  
29 fits of blended group interventions in routine care.  
30  
31  
32  
33

## 34 35 36 37 **Role of funding source**

38  
39 This research did not receive any specific grant from funding agencies in the public, commercial, or  
40 not-for-profit sectors.  
41  
42  
43  
44

## 45 46 **Conflict of interest**

47  
48 None of the authors has, or has had, any financial, personal or other relationship with people or or-  
49 ganisations that would interfere with the interpretation and presentation of this study's findings.  
50  
51  
52  
53

## 54 55 **References**

- 1
  - 2
  - 3
  - 4
  - 5
  - 6
  - 7
  - 8
  - 9
  - 10
  - 11
  - 12
  - 13
  - 14
  - 15
  - 16
  - 17
  - 18
  - 19
  - 20
  - 21
  - 22
  - 23
  - 24
  - 25
  - 26
  - 27
  - 28
  - 29
  - 30
  - 31
  - 32
  - 33
  - 34
  - 35
  - 36
  - 37
  - 38
  - 39
  - 40
  - 41
  - 42
  - 43
  - 44
  - 45
  - 46
  - 47
  - 48
  - 49
  - 50
  - 51
  - 52
  - 53
  - 54
  - 55
  - 56
  - 57
  - 58
  - 59
  - 60
1. Vigo, D., Thornicroft, G., & Atun, R. (2016). Estimating the true global burden of mental illness. *The Lancet Psychiatry*, 3(2), 171-178.
  2. Tomlinson, M., Rudan, I., Saxena, S., Swartz, L., Tsai, A. C., & Patel, V. (2009). Setting priorities for global mental health research. *Bulletin of the World Health Organization*, 87(6), 438-446.
  3. Wykes, T., Haro, J. M., Belli, S. R., Obradors-Tarragó, C., Arango, C., Ayuso-Mateos, J. L., ... & Elfeddali, I. (2015). Mental health research priorities for Europe. *The Lancet Psychiatry*, 2(11), 1036-1042.
  4. Cuijpers, P., Riper, H., & Andersson, G. (2015). Internet-based treatment of depression. *Current Opinion in Psychology*, 4, 131-135.
  5. Păsărelu, C. R., Andersson, G., Nordgren, L. B., & Dobrean, A. (2016). Internet-delivered transdiagnostic and tailored cognitive behavioral therapy for anxiety and depression: a systematic review and meta-analysis of randomized controlled trials. *Cognitive Behaviour Therapy*, 46(1), 1-28.
  6. Andersson, G., & Titov, N. (2014). Advantages and limitations of Internet-based interventions for common mental disorders. *World Psychiatry*, 13(1), 4-11.
  7. Emmelkamp, P. M., David, D., Beckers, T., Muris, P., Cuijpers, P., Lutz, W., ... & Vervliet, B. (2013). Advancing psychotherapy and evidence-based psychological interventions. *International Journal of Methods in Psychiatric Research*, 23(S1), 58-91.
  8. Titov, N., Dear, B. F., Staples, L. G., Bennett-Levy, J., Klein, B., Rapee, R. M., . . . Niessen, O. B. (2015). MindSpot Clinic: An Accessible, Efficient, and Effective Online Treatment Service for Anxiety and Depression. *Psychiatric Services*, 66(10), 1043-1050.
  9. Hedman, E., Ljótsson, B., Kaldø, V., Hesser, H., Alaoui, S. E., Kraepelien, M., ... Lindefors, N. (2014). Effectiveness of Internet-based cognitive behaviour therapy for depression in routine psychiatric care. *Journal of Affective Disorders*, 155, 49-58.
  10. Kenter, R., Warmerdam, L., Brouwer-Dudokdeuit, C., Cuijpers, P., & Straten, A. V. (2013). Guided online treatment in routine mental health care: an observational study on uptake, drop-out and effects. *BMC Psychiatry*, 13(1), 43.
  11. Ebert, D. D., Hannig, W., Tarnowski, T., Sieland, B., Götzky, B., & Berking, M. (2013). Web-based rehabilitation aftercare following inpatient psychosomatic treatment. *Die Rehabilitation*, 52(3), 164-172.
  12. Erbe, D., Eichert, H. C., Riper, H., & Ebert, D. D. (2017). Blending Face-to-Face and Internet-Based Interventions for the Treatment of Mental Disorders in Adults: Systematic Review. *Journal of Medical Internet Research*, 19(9), e306.
  13. van der Vaart, R. V., Witting, M., Riper, H., Kooistra, L., Bohlmeijer, E. T., & Gemert-Pijnen, L. J. (2014). Blending online therapy into regular face-to-face therapy for depression: content, ratio and preconditions according to patients and therapists using a Delphi study. *BMC Psychiatry*, 14(1), 355.
  14. Kooistra, L. C., Wiersma, J. E., Ruwaard, J., Oppen, P. V., Smit, F., Lokkerbol, J., . . . Riper, H. (2014). Blended vs. face-to-face cognitive behavioural treatment for major depression in specialized mental health care: study protocol of a randomized controlled cost-effectiveness trial. *BMC Psychiatry*, 14(1), 290.
  15. Kaiser, T., & Laireiter, A. R. (2017). DynAMo: A Modular Platform for Monitoring Process, Outcome, and Algorithm-Based Treatment Planning in Psychotherapy. *JMIR medical informatics*, 5(3), e20.

- 1
  - 2
  - 3
  - 4
  - 5
  - 6
  - 7
  - 8
  - 9
  - 10
  - 11
  - 12
  - 13
  - 14
  - 15
  - 16
  - 17
  - 18
  - 19
  - 20
  - 21
  - 22
  - 23
  - 24
  - 25
  - 26
  - 27
  - 28
  - 29
  - 30
  - 31
  - 32
  - 33
  - 34
  - 35
  - 36
  - 37
  - 38
  - 39
  - 40
  - 41
  - 42
  - 43
  - 44
  - 45
  - 46
  - 47
  - 48
  - 49
  - 50
  - 51
  - 52
  - 53
  - 54
  - 55
  - 56
  - 57
  - 58
  - 59
  - 60
16. Månsson, K. N., Ruiz, E. S., Gervind, E., Dahlin, M., & Andersson, G. (2013). Development and Initial Evaluation of an Internet-Based Support System for Face-to-Face Cognitive Behavior Therapy: A Proof of Concept Study. *Journal of Medical Internet Research*, *15*(12), e280.
17. Ly, K. H., Trüschel, A., Jarl, L., Magnusson, S., Windahl, T., Johansson, R., ... & Andersson, G. (2014). Behavioural activation versus mindfulness-based guided self-help treatment administered through a smartphone application: a randomised controlled trial. *BMJ open*, *4*(1), e003440.
18. Selmi, P. M., Klein, M. H., Greist, J. H., Johnson, J. H., & Harris, W. G. (1982). An investigation of computer-assisted cognitive-behavior therapy in the treatment of depression. *Behavior Research Methods & Instrumentation*, *14*(2), 181-185.
19. Selmi, P. M., Klein, M. H., Griest, J. H., Sorrell, S. P., & Erdman, H. P. (1990). Computer-administered cognitive-behavioral therapy for depression. *American Journal of Psychiatry*, *147*, 51-56.
20. Newman, M. G., Kenardy, J., Herman, S., & Taylor, C. (1996). The use of hand-held computers as an adjunct to cognitive-behavior therapy. *Computers in Human Behavior*, *12*(1), 135-143.
21. Wright, J. H., Wright, A. S., Salmon, P., Beck, A. T., Kuykendall, J., Goldsmith, L. J., & Zickel, M. B. (2002). Development and initial testing of a multimedia program for computer-assisted cognitive therapy. *American Journal of Psychotherapy*, *56*(1), 76.
22. Wright, J. H., Wright, A. S., Albano, A. M., Basco, M. R., Goldsmith, L. J., Raffield, T., & Otto, M. W. (2005). Computer-Assisted Cognitive Therapy for Depression: Maintaining Efficacy While Reducing Therapist Time. *American Journal of Psychiatry*, *162*(6), 1158-1164.
23. Kleiboer, A., Smit, J., Bosmans, J., Ruwaard, J., Andersson, G., Topooco, N., . . . Riper, H. (2016). European COMPARative Effectiveness research on blended Depression treatment versus treatment-as-usual (E-COMPARED): study protocol for a randomized controlled, non-inferiority trial in eight European countries. *Trials*, *17*(1), 387.
24. Waller, G. (2009). Evidence-based treatment and therapist drift. *Behaviour Research and Therapy*, *47*(2), 119-127.
25. Ruwaard, J., & Kok, R. (2015). Wild West eHealth: Time to hold our horses. *European Health Psychologist*, *17*(1), 45-49.
26. Schuster, R., Berger, T., & Laireiter, A.-R. (2017). Computer und Psychotherapie – geht das zusammen? Zum Stand der Entwicklung von Online-und gemischten Interventionen in der Psychotherapie. *Psychotherapeut*, 1-12.
27. Riedel, M. (2015, April 3). *Modelle der Psychotherapieversorgung in Österreich; Endbericht; Studie im Auftrag des Hauptverbandes der österreichischen Sozialversicherungsträger*. Retrieved from <http://www.hauptverband.at/cdscontent/load?contentid=10008.619271&version=1430822267>
28. Weber, R., & Strauss, B. (2015). Group Psychotherapy in Germany. *International Journal of Group Psychotherapy*, *65*(4), 513-525.
29. Yalom, I. D., & Leszcz, M. (2005). *Theory and practice of group psychotherapy* (5<sup>th</sup> ed.). New York, NY: Basic books.
30. National Institute for Health and Care Excellence (2009). *Depression in adults: recognition and management. Clinical Guideline 90*. Retrived from <http://guidance.nice.org.uk/cg123>

- 1
- 2
- 3 31. Gruber, K., Moran, P. J., Roth, W. T. & Taylor, C. B. (2002). Computer-assisted cognitive behavioral
- 4 group therapy for social phobia. *Behavior Therapy*, 32, 155-165.
- 5
- 6 32. Przeworski, A., & Newman, M. G. (2004). Palmtop computer-assisted group therapy for social phobia.
- 7 *Journal of Clinical Psychology*, 60, 179 – 188.
- 8
- 9 33. Newman, M. G., Przeworski, A., Consoli, A. J., & Taylor, C. B. (2014). A randomized controlled trial of
- 10 ecological momentary intervention plus brief group therapy for generalized anxiety disorder. *Psycho-*
- 11 *therapy*, 51, 198.
- 12
- 13 34. Miloff, A., Marklund, A., & Carlbring, P. (2015). The challenger app for social anxiety disorder: New ad-
- 14 vances in mobile psychological treatment. *Internet Interventions*, 2, 382-391.
- 15
- 16 35. Schuster, R., Leitner, I., Carlbring, P., & Laireiter, A.-R. (2017). Exploring blended group interventions
- 17 for depression: Randomised controlled feasibility study of a blended computer- and multimedia-
- 18 supported psychoeducational group intervention for adults with depressive symptoms. *Internet*
- 19 *Interventions*, 2(8), 63-71.
- 20
- 21 36. Ellis, L. A., Collin, P., Hurley, P. J., Davenport, T. A., Burns, J. M., & Hickie, I. B. (2013). Young men's atti-
- 22 tudes and behaviour in relation to mental health and technology: implications for the development of
- 23 online mental health services. *BMC psychiatry*, 13(1), 119.
- 24
- 25 37. Grawe, K. (2004). *Psychological therapy*. Göttingen, Germany: Hogrefe.
- 26
- 27 38. Rehm, L. P. (1984). Self-management therapy for depression. *Advances in Behaviour Research and*
- 28 *Therapy*, 6(2), 83-98.
- 29
- 30 39. Ly, K. H., Topooco, N., Cederlund, H., Wallin, A., Bergström, J., Molander, O., ... & Andersson, G.
- 31 (2015). Smartphone-supported versus full behavioural activation for depression: a randomised con-
- 32 trolled trial. *PLoS One*, 10(5), e0126559.
- 33
- 34 40. Kooistra, L. C., Ruwaard, J., Wiersma, J. E., van Oppen, P., van der Vaart, R., van Gemert-Pijnen, J. E., &
- 35 Riper, H. (2016). Development and initial evaluation of blended cognitive behavioural treatment for
- 36 major depression in routine specialized mental health care. *Internet interventions*, 4, 61-71.
- 37
- 38 41. Delgadillo, J., Kellett, S., Ali, S., McMillan, D., Barkham, M., Saxon, D., ... & Thwaites, R. (2016). A multi-
- 39 service practice research network study of large group psychoeducational cognitive behavioural ther-
- 40 apy. *Behaviour research and therapy*, 87, 155-161.
- 41
- 42 42. Margraf, J. (2013). *Mini-DIPS: Diagnostisches Kurz-Interview bei psychischen Störungen*. Berlin,
- 43 Germany: Springer.
- 44
- 45 43. Margraf, J., Schneider, S., Ehlers, A., DiNardo, P., & Barlow, D. (2013). *DIPS Diagnostisches Interview*
- 46 *bei psychischen Störungen: Interviewleitfaden*. Berlin, Germany: Springer.
- 47
- 48 44. DeLucia-Waack, J. L., Kalodner, C. R., & Riva, M. (2014). *Handbook of group counseling and psycho-*
- 49 *therapy*. Thousand Oaks, CA: Sage.
- 50
- 51 45. Hautzinger, M., & Bailer, M. (1993). *Allgemeine Depressions Skala (ADS). Manual*. Weinheim,
- 52 Germany: Beltz.
- 53
- 54 46. Hautzinger, M., Bailer, M., Hofmeister, D., & Keller, F. (2012). *Allgemeine Depressionsskala. Manual*
- 55 *(2<sup>nd</sup> ed.)*. Göttingen, Germany: Hogrefe.
- 56
- 57
- 58
- 59
- 60



- 1
  - 2
  - 3
  - 4
  - 5
  - 6
  - 7
  - 8
  - 9
  - 10
  - 11
  - 12
  - 13
  - 14
  - 15
  - 16
  - 17
  - 18
  - 19
  - 20
  - 21
  - 22
  - 23
  - 24
  - 25
  - 26
  - 27
  - 28
  - 29
  - 30
  - 31
  - 32
  - 33
  - 34
  - 35
  - 36
  - 37
  - 38
  - 39
  - 40
  - 41
  - 42
  - 43
  - 44
  - 45
  - 46
  - 47
  - 48
  - 49
  - 50
  - 51
  - 52
  - 53
  - 54
  - 55
  - 56
  - 57
  - 58
  - 59
  - 60
47. Goldberg, D. P., & Williams, P. A. (1988). *A users's guide to the General Health Questionnaire*. Windsor, UK: NFER-Nelson.
48. Goldberg, D. P., Gater, R., Sartorius, N., Ustun, T. B., Piccinelli, M., Gureje, O., & Rutter, C. (1997). The validity of two versions of the GHQ in the WHO study of mental illness in general health care. *Psychological Medicine*, 27(1), 191-197.
49. Schnitz, N., Kruse, J., & Tress, W. (1999). Psychometric properties of the General Health Questionnaire (GHQ-12) in a German primary care sample. *Acta psychiatrica Scandinavica*, 100(6), 462-468.
50. Cano, A., Sprafkin, R. P., Scaturo, D. J., Lantinga, L. J., Fiese, B. H., & Brand, F. (2001). Mental health screening in primary care: a comparison of 3 brief measures of psychological distress. *Primary care companion to the Journal of clinical psychiatry*, 3(5), 206-210.
51. Jack, M. (2007). *Fragebogen zur Erfassung von Ressourcen und Selbstmanagementfähigkeiten (FERUS)*. Göttingen, Germany: Hogrefe.
52. Brown, K. W., & Ryan, R. M. (2003). The benefits of being present: mindfulness and its role in psychological well-being. *Journal of personality and social psychology*, 84(4), 822.
53. Michalak, J., Heidenreich, T., Ströhle, G., & Nachtigall, C. (2008). Die deutsche Version des Mindful Attention and Awareness Scale (MAAS). Psychometrische Befunde zu einem Achtsamkeitsfragebogen. *Zeitschrift für Klinische Psychologie und Psychotherapie*, 37(3), 200-208.
54. Brooke, J. (1996). SUS: A „quick and dirty“ usability scale. In P. W. Jordan, B. Thomas, B. A. Weerdmeester, & I. L. McClelland (Eds.) *Usability Evaluation in Industry* (p. 189-194). London, UK: Taylor.
55. Bangor, A., Kortum, P., & Miller, J. (2009). Determining what individual SUS scores mean: Adding an adjective rating scale. *Journal of usability studies*, 4(3), 114-123.
56. Schmidt, J., Lamprecht, F., & Wittmann, W. W. (1989). Zufriedenheit mit der stationären Versorgung. Entwicklung eines Fragebogens und erste Validitätsuntersuchungen. *Psychotherapie, Psychosomatik, Medizinische Psychologie*, 39, 248-255.
57. Larsen, D. L., Attkisson, C. C., Hargreaves, W. A., & Nguyen, T. D. (1979). Assessment of client/patient satisfaction: development of a general scale. *Evaluation and program planning*, 2(3), 197-207.
58. IBM, C. (2016). *IBM SPSS statistics for windows, version 24.0*. Armonk, NY: IBM, Corp.
59. Jacobson, N. S., & Turax, P. (1991). Clinical significance: a statistical approach to defining meaningful change in psychotherapy research. *Journal of consulting and clinical psychology*, 59, 12-19.
60. Lambert, M. J., & Ogles, B. M. (2009). Using clinical significance in psychotherapy outcome research: the need for a common procedure and validity data. *Psychotherapy Research*, 19(4), 493-501.
61. Cohen, J. (1988). *Statistical power analysis for the behavioral sciences* (2<sup>nd</sup> ed.). Hillsdale, NJ.: Lawrence Erlbaum Associates.
62. Faul, F., Erdfelder, E., Lang, A. G., & Buchner, A. (2007). G\*Power 3: a flexible statistical power analysis program for the social, behavioral, and biomedical sciences. *Behavior Research Methods*, 39, 175-191.
63. Zumbach, J. (2010). *Lernen mit neuen Medien. Instruktionspsychologische Grundlagen*. Stuttgart, Germany: Kohlhammer.
64. Bauer, S., Wolf, M., Haug, S., & Kordy, H. (2011). The effectiveness of internet chat groups in relapse prevention after inpatient psychotherapy. *Psychotherapy Research*, 21, 219-226.



- 1  
2  
3 65. Schulz, A., Stolz, T., Vincent, A., Krieger, T., Andersson, G., & Berger, T. (2016). A sorrow shared is a  
4 sorrow halved? A three-arm randomized controlled trial comparing internet-based clinician-guided in-  
5 dividual versus group treatment for social anxiety disorder. *Behaviour Research and Therapy*, *84*, 14-  
6 26.  
7  
8 66. Schuster, R. (2017, November 29). Patients' experiences of blended Group Therapy for Depression –  
9 Part 1: Fit and Implications for the Group Setting. Retrieved from [osf.io/su6xt](http://osf.io/su6xt)  
10  
11 67. Zwerenz, R., Becker, J., Knickenberg, R. J., Siepmann, M., Hagen, K., & Beutel, M. E. (2017). Online Self-  
12 Help as an Add-On to Inpatient Psychotherapy: Efficacy of a New Blended Treatment Approach. *Psy-*  
13 *chotherapy and Psychosomatics*, *86*(6), 341-350.  
14  
15 68. Berger, T., Krieger, T., Sude, K., Meyer, B., & Maercker, A. (2017). Evaluating an e-mental health pro-  
16 gram ("deprexis") as adjunctive treatment tool in psychotherapy for depression: Results of a pragmat-  
17 ic randomized controlled trial. *Journal of Affective Disorders*.  
18  
19 69. Topooco, N., Riper, H., Araya, R., Berking, M., Brunn, M., Chevreur, K., ... & Kleiboer, A. (2017). Atti-  
20 tudes towards digital treatment for depression: A European stakeholder survey. *Internet Interventions*,  
21 *8*, 1-9.  
22  
23 70. Nicholas, J., Boydell, K., & Christensen, H. (2016). mHealth in psychiatry: time for methodological  
24 change. *Evidence-based mental health*, *19*(2), 33-34.  
25  
26 71. Yardley, L., Spring, B. J., Riper, H., Morrison, L. G., Crane, D. H., Curtis, K., ... & Blandford, A. (2016).  
27 Understanding and promoting effective engagement with digital behavior change interventions.  
28 *American Journal of Preventive Medicine*, *51*(5), 833-842.  
29  
30 72. Kenter, R. M., van de Ven, P. M., Cuijpers, P., Koole, G., Niamat, S., Gerrits, R. S., ... van Straten, A.  
31 (2015). Costs and effects of Internet cognitive behavioral treatment blended with face-to-face treat-  
32 ment: results from a naturalistic study. *Internet Interventions*, *2*(1), 77-83.  
33  
34 73. El Alaoui, S., Hedman, E., Kaldo, V., Hesser, H., Kraepelien, M., Andersson, E., ... Lindefors, N. (2015).  
35 Effectiveness of Internet-based cognitive-behavior therapy for social anxiety disorder in clinical psy-  
36 chiatry. *Journal of consulting and clinical psychology*, *83*(5), 902.  
37  
38 74. Lindner, P., Nyström, M. B., Hassmén, P., Andersson, G., & Carlbring, P. (2015). Who seeks ICBT for de-  
39 pression and how do they get there? Effects of recruitment source on patient demographics and clini-  
40 cal characteristics. *Internet Interventions*, *2*(2), 221-225.  
41  
42  
43  
44  
45  
46  
47  
48  
49  
50  
51  
52  
53  
54  
55  
56  
57  
58  
59  
60

Table 1.

*Group sessions and computer and multimedia elements of the intervention.*

| Week  | Group session                                                                                                                                                                                                                                                                                           | Computer & multimedia elements                                              |
|-------|---------------------------------------------------------------------------------------------------------------------------------------------------------------------------------------------------------------------------------------------------------------------------------------------------------|-----------------------------------------------------------------------------|
|       | Pre-assessment                                                                                                                                                                                                                                                                                          | Worksheet 1<br>Video 1                                                      |
| C.1   | Opening and information about intervention and online platform. Psychoeducation on depression. Introduction to the current concerns concept. Instruction for current concerns diary, and relaxation.                                                                                                    | PPT-Presentation<br>Worksheet 2<br>Video 2                                  |
| C.2   | Discussion of homework assignments. Psychoeducation on human perception and cognitive biases. Discussion on frequent cognitive distortions. Psychoeducation on acceptance and mindfulness principles. Instruction for the "Thoughts and mindfulness" diary task.                                        | PPT-Presentation<br>Video 3<br>Mobile phone diary*                          |
| P.3   | Discussion of homework assignments. Psychoeducation on human memory and learning processes. Exercise on cognitive restructuring. Introduction to "Happiness" diary and activity list.                                                                                                                   | PPT-Presentation<br>Worksheet 3<br>Videos 4 & 5<br>Mobile phone diary*      |
| P/A.4 | Discussion of homework assignments. Psychoeducation on psychological motivation theories and goal setting, with emphasis on Vroom's VIE-theory (1964). Group exercise on "SMART" goal setting and instruction for Goal-Attainment-Scaling.                                                              | PPT-Presentation<br>Online Goal Attainment-Scaling with feedback            |
|       | Break                                                                                                                                                                                                                                                                                                   |                                                                             |
| A.5   | Revision of sessions 1-4. Psychoeducation on self-regulation and self-control. Group exercise on strengths and weaknesses profile. Discussion and refinement of individual goals. Instructions for weekly diary task.                                                                                   | PPT-Presentation<br>Contract with myself-Worksheet 4<br>Mobile phone diary* |
| A.6   | Discussion of homework assignments. Psychoeducation on time management, realistic time scheduling. Group exercise "Time-thieves". Group discussion on practical aspects of time management and prioritisation. Introduction to specific time management methods. Group exercise "Stress traffic light". | PPT-Presentation<br>Worksheet 5 + Video 5<br>Mobile phone diary*            |
| M.7   | Revision of sessions 5-7. Psychoeducation on slow and problematic change patterns and handling of setbacks. Group discussion on problematic change and relapse prevention.                                                                                                                              | PPT-Presentation                                                            |
|       | Post-assessment                                                                                                                                                                                                                                                                                         |                                                                             |

*Note:* Letters C to M: Treatment stages (C = contemplation, P = preparation, A = action, M = maintenance); PPT-Presentation = in-session PowerPoint presentation; Mobile phone diary\* = participants were free to choose between a mobile phone diary or a handwritten diary.

Table 2.

*Demographic, behavioural and clinical characteristics of the study sample at pre-treatment (N = 26).*

| Characteristic                                                        | Mean (SD) or n (%) |
|-----------------------------------------------------------------------|--------------------|
| Age, mean (SD)                                                        | 33.9 (7.5)         |
| Gender, female, n (%)                                                 | 21 (81)            |
| Education, n (%)                                                      |                    |
| ≥ 9 years (compulsory school)                                         | 3 (12)             |
| ≥ 12 years (A level)                                                  | 9 (34)             |
| ≥ any tertiary education (e.g. university)                            | 14 (54)            |
| Employment, n (%)                                                     |                    |
| - full time                                                           | 11 (42)            |
| - part time                                                           | 7 (27)             |
| - currently none                                                      | 8 (31)             |
| Current psychopharmacological treatment, n (%)                        | 3 (12)             |
| Prior psychotherapeutic treatment, n (%)                              | 14 (54)            |
| Computer experience, n (%)                                            |                    |
| - daily use                                                           | 22 (85)            |
| - few times a week                                                    | 4 (15)             |
| Diagnosis, n (%)                                                      |                    |
| Major depression (F32.0 or F32.1)                                     | 26 (100)           |
| + Double depression (F32.0 or F32.1 + F34.1)                          | 4 (15)             |
| + Generalized anxiety disorder (F41.1)                                | 4 (15)             |
| + Social anxiety disorder (F40.1)                                     | 3 (12)             |
| + Panic disorder (F41.0)                                              | 2 (8)              |
| + Specific phobia (F40.2)                                             | 2 (8)              |
| + Hypochondriasis (F45.2)                                             | 1 (4)              |
| Comorbidity (participants fulfilling two or more diagnostic criteria) | 12 (46)            |
| 1 comorbidity                                                         | 6 (23)             |
| ≥ 2 comorbidities                                                     | 6 (23)             |

Table 3.  
Means, standard deviations, effect sizes (Cohen's *d*) and reliable change for primary and secondary outcomes.

|        | N  | Estimated means (SD) |                |                   | Effect sizes<br>(estimated means) | Reliable change           |                                |
|--------|----|----------------------|----------------|-------------------|-----------------------------------|---------------------------|--------------------------------|
|        |    | Pre                  | Post           | Follow-up         | Pre- to follow-up<br>effect size  | Pre- to post<br>RCI (CSI) | Pre- to follow-up<br>RCI (CSI) |
| CES-D  | 26 | 24.58<br>(6.51)      | 14.19 (6.73)   | 13.28 (6.06)      | 1.80<br>[1.13 - 2.41]             | 69 (65)                   | 70 (70)                        |
| GHQ-12 | 26 | 5.50 (2.25)          | 2.00 (3.11)    | 2.05 (2.94)       | 1.32<br>[0.70 - 1.89]             | 65 (65)                   | 75 (75)                        |
| FERUS  | 26 | 134.54<br>(25.94)    | 156.04 (25.22) | 157.52<br>(25.31) | 0.90<br>[0.31 - 1.45]             | --                        | --                             |
| MAAS   | 26 | 3.29 (0.78)          | 4.05 (1.01)    | 4.25 (0.93)       | 1.12<br>[0.52 - 1.68]             | --                        | --                             |

Note. Standard deviations are shown in round parentheses and 95 % confidence intervals are shown in square parentheses. CES-D: Center for Epidemiological Studies-Depression scale (cut-off > 17); GHQ-12: General Health Questionnaire (cut-off > 1); FERUS: Questionnaire for the Assessment of Resources and Strengths; MAAS: Mindful Attention Awareness Scale; RCI = reliable change index; CSI = clinically reliable improvement.

Table 4.  
Appraisal of intervention elements and usage data (N = 26).

| Intervention elements                        | Average           | --- | -- | -  | +  | ++ | +++ |
|----------------------------------------------|-------------------|-----|----|----|----|----|-----|
| New media in general                         | 5.16              | -   | 4  | -  | 24 | 20 | 52  |
| Weekly group sessions                        | 5.40              | -   | -  | -  | 16 | 28 | 56  |
| In-session multimedia                        | 5.08              | -   | 4  | 4  | 12 | 40 | 40  |
| between-session communication with therapist | 5.08              | -   | 4  | 4  | 24 | 20 | 48  |
| Weekly psychoeducational videos              | 4.88              | 4   | -  | 8  | 20 | 28 | 40  |
| Online platform                              | 4.8               | -   | 8  | 12 | 12 | 28 | 40  |
| Group interaction                            | 4.64 <sup>+</sup> | -   | -  | 4  | 28 | 36 | 32  |
| Discussion forum                             | 3.52***           | -   | 4  | 48 | 40 | 8  | -   |

  

| Usage data                                    | OS 1 | OS 2 | OS 3 | OS 4 | OS 5 | OS 6 | OS 7 |
|-----------------------------------------------|------|------|------|------|------|------|------|
| Average logins per week (per module)          | 5.0  | 3.4  | 3.6  | 3.2  | 2.7  | 2.5  | 1.8  |
| Average downloads of work sheet / week        | 1.9  | 1.3  | 1.5  | 1.1  | 1.0  | 0.9  | -    |
| Average downloads of in-session slides / week | 1.3  | 1.0  | 1.2  | 0.9  | 0.8  | 0.6  | 0.4  |

Average logins during follow-up period 4.5

Note. --- not at all helpful (%), -- not helpful (%), - of little help (%), + somewhat helpful (%), ++ helpful (%), +++ very helpful (%), <sup>+</sup> = tentatively significant, \*\*\* = highly significant, OS = online session

Table 5.  
Applicability of the blended intervention and treatment process aspects (N = 26).

| Applicability of the blended intervention                          | Yes (%) | No (%) | p-Value   |
|--------------------------------------------------------------------|---------|--------|-----------|
| 1) Would you prefer to leave out computer and multimedia elements? | 16      | 84     |           |
| 2) Do you think technology could help to improve group trainings?  | 96      | 4      |           |
| ... to improve group psychotherapy?                                | 80 *    | 20     | p = 0.043 |
| ... to improve individual psychotherapy?                           | 48 ***  | 52     | p = 0.000 |

|                                                                                                              |    |    |             |
|--------------------------------------------------------------------------------------------------------------|----|----|-------------|
| 3) Do you think technology could help to intensify group trainings?<br>... to intensify group psychotherapy? | 88 | 12 | $p = 0.103$ |
| 4) Would you like to continue this treatment?                                                                | 72 | 28 |             |
|                                                                                                              | 88 | 12 |             |

5) Optimal number of group sessions (MD) 12-15

| Treatment process aspects                             | Yes (%) | Neutral (%) | No (%) |
|-------------------------------------------------------|---------|-------------|--------|
| Used contents resulted in too little flexibility      | 16      | 24          | 60     |
| There was too much structure                          | 20      | 24          | 56     |
| There was too much information                        | 16      | 32          | 52     |
| I'd have preferred more time for talking and exchange | 48      | 32          | 20     |

Note. \*  $p < 0.05$ , \*\*\*  $p < 0.001$ .

Table 6.

Top 10 ranking of subjectively perceived therapeutic factors (N = 26).

| Rank | Therapeutic factor                           | n counts | % of all participants |
|------|----------------------------------------------|----------|-----------------------|
| 1.   | Weekly lectures                              | 23       | 89                    |
| 2.   | Increase of positive thoughts                | 20       | 77                    |
| 3.   | Restructuring of negative thoughts           | 19       | 73                    |
| 4.   | Computer and multimedia use                  | 18       | 69                    |
| 4.   | Trainer (social and professional skills)     | 18       | 69                    |
| 6.   | Group (coherence and interpersonal learning) | 17       | 65                    |
| 6.   | Positive activities                          | 17       | 65                    |
| 8.   | Reflexion                                    | 16       | 62                    |
| 9.   | Mindfulness exercises                        | 14       | 54                    |
| 9.   | Exercises on resources and strengths         | 14       | 54                    |

Note: n counts = number of counts associated with a specific factor; % of all participants = proportion of all participants

Figure legend:

Figure 1. Study's flow chart

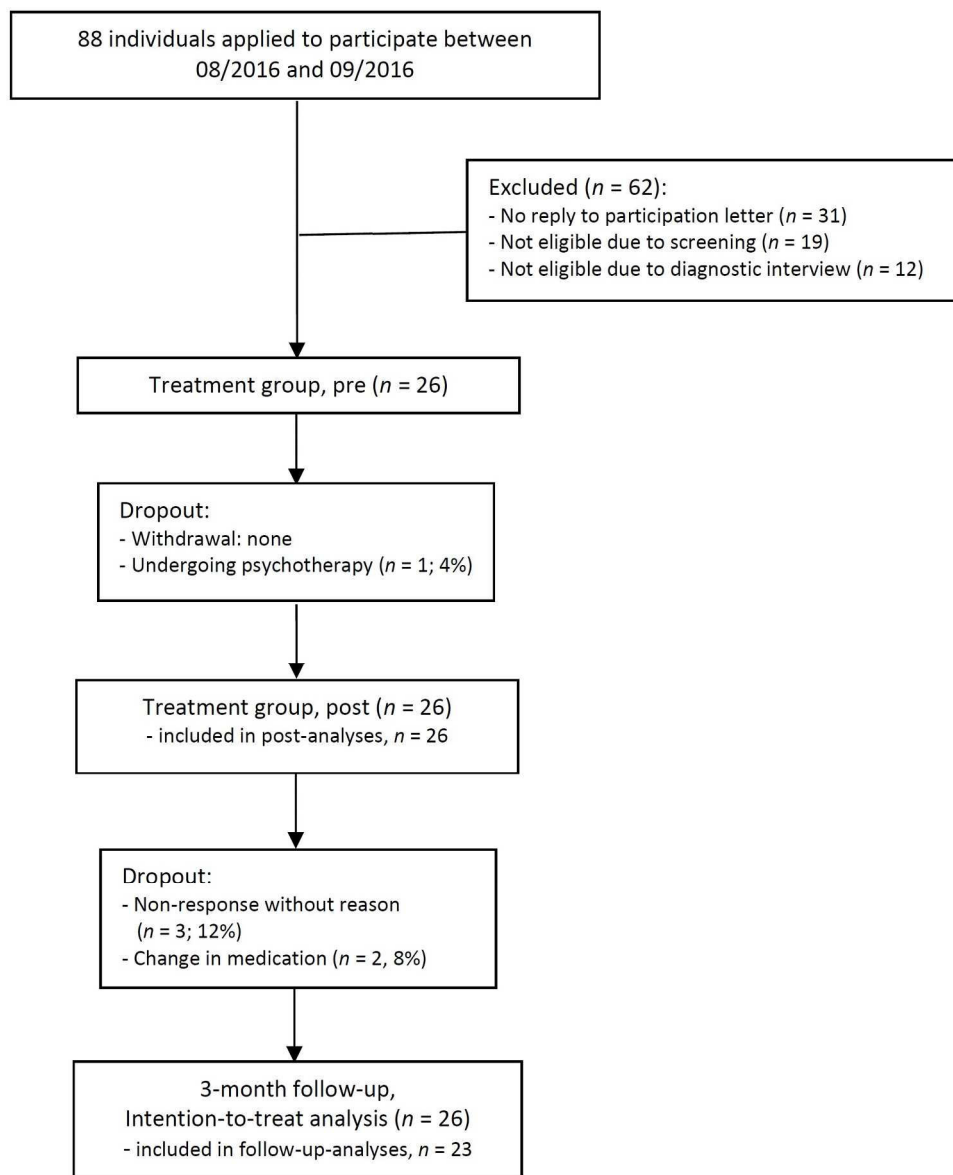

183x225mm (300 x 300 DPI)

**STROBE 2007 (v4) checklist of items to be included in reports of observational studies in epidemiology\***  
**Checklist for cohort, case-control, and cross-sectional studies (combined)**

| Section/Topic             | Item # | Recommendation                                                                                                                                                                                                         | Reported on page # |
|---------------------------|--------|------------------------------------------------------------------------------------------------------------------------------------------------------------------------------------------------------------------------|--------------------|
| Title and abstract        | 1      | (a) Indicate the study's design with a commonly used term in the title or the abstract                                                                                                                                 | 1                  |
|                           |        | (b) Provide in the abstract an informative and balanced summary of what was done and what was found                                                                                                                    | 2                  |
| <b>Introduction</b>       |        |                                                                                                                                                                                                                        |                    |
| Background/rationale      | 2      | Explain the scientific background and rationale for the investigation being reported                                                                                                                                   | 4-6                |
| Objectives                | 3      | State specific objectives, including any pre-specified hypotheses                                                                                                                                                      | 6                  |
| <b>Methods</b>            |        |                                                                                                                                                                                                                        |                    |
| Study design              | 4      | Present key elements of study design early in the paper                                                                                                                                                                | 6-7                |
| Setting                   | 5      | Describe the setting, locations, and relevant dates, including periods of recruitment, exposure, follow-up, and data collection                                                                                        | 7                  |
| Participants              | 6      | (a) <i>Cohort study</i> —Give the eligibility criteria, and the sources and methods of selection of participants. Describe methods of follow-up                                                                        | 7                  |
|                           |        | <i>Case-control study</i> —Give the eligibility criteria, and the sources and methods of case ascertainment and control selection. Give the rationale for the choice of cases and controls                             | 6                  |
|                           |        | <i>Cross-sectional study</i> —Give the eligibility criteria, and the sources and methods of selection of participants                                                                                                  | Not applicable     |
|                           |        | (b) <i>Cohort study</i> —For matched studies, give matching criteria and number of exposed and unexposed<br><i>Case-control study</i> —For matched studies, give matching criteria and the number of controls per case | Not applicable     |
| Variables                 | 7      | Clearly define all outcomes, exposures, predictors, potential confounders, and effect modifiers. Give diagnostic criteria, if applicable                                                                               | 8-9                |
| Data sources/ measurement | 8*     | For each variable of interest, give sources of data and details of methods of assessment (measurement). Describe comparability of assessment methods if there is more than one group                                   | 8-10               |
| Bias                      | 9      | Describe any efforts to address potential sources of bias                                                                                                                                                              | 3, 6, 9            |
| Study size                | 10     | Explain how the study size was arrived at                                                                                                                                                                              | 9                  |
| Quantitative variables    | 11     | Explain how quantitative variables were handled in the analyses. If applicable, describe which groupings were chosen and why                                                                                           | 9                  |
| Statistical methods       | 12     | (a) Describe all statistical methods, including those used to control for confounding                                                                                                                                  | 9                  |
|                           |        | (b) Describe any methods used to examine subgroups and interactions                                                                                                                                                    | Not applicable     |
|                           |        | (c) Explain how missing data were addressed                                                                                                                                                                            | 9                  |
|                           |        | (d) <i>Cohort study</i> —If applicable, explain how loss to follow-up was addressed<br><i>Case-control study</i> —If applicable, explain how matching of cases and controls was addressed                              | 9                  |

|                          |     |                                                                                                                                                                                                              |                |
|--------------------------|-----|--------------------------------------------------------------------------------------------------------------------------------------------------------------------------------------------------------------|----------------|
|                          |     | <i>Cross-sectional study</i> —If applicable, describe analytical methods taking account of sampling strategy                                                                                                 |                |
|                          |     | (e) Describe any sensitivity analyses                                                                                                                                                                        | Not applicable |
| <b>Results</b>           |     |                                                                                                                                                                                                              |                |
| Participants             | 13* | (a) Report numbers of individuals at each stage of study—eg numbers potentially eligible, examined for eligibility, confirmed eligible, included in the study, completing follow-up, and analysed            | 9, Fig 1       |
|                          |     | (b) Give reasons for non-participation at each stage                                                                                                                                                         | 9, Fig 1       |
|                          |     | (c) Consider use of a flow diagram                                                                                                                                                                           | Fig 1          |
| Descriptive data         | 14* | (a) Give characteristics of study participants (eg demographic, clinical, social) and information on exposures and potential confounders                                                                     | 21, Table 2    |
|                          |     | (b) Indicate number of participants with missing data for each variable of interest                                                                                                                          | Not applicable |
|                          |     | (c) <i>Cohort study</i> —Summarise follow-up time (eg, average and total amount)                                                                                                                             | 6, 10          |
| Outcome data             | 15* | <i>Cohort study</i> —Report numbers of outcome events or summary measures over time                                                                                                                          | #=4            |
|                          |     | <i>Case-control study</i> —Report numbers in each exposure category, or summary measures of exposure                                                                                                         | -              |
|                          |     | <i>Cross-sectional study</i> —Report numbers of outcome events or summary measures                                                                                                                           | -              |
| Main results             | 16  | (a) Give unadjusted estimates and, if applicable, confounder-adjusted estimates and their precision (eg, 95% confidence interval). Make clear which confounders were adjusted for and why they were included | 22, Table 3    |
|                          |     | (b) Report category boundaries when continuous variables were categorized                                                                                                                                    | Not applicable |
|                          |     | (c) If relevant, consider translating estimates of relative risk into absolute risk for a meaningful time period                                                                                             | Not applicable |
| Other analyses           | 17  | Report other analyses done—eg analyses of subgroups and interactions, and sensitivity analyses                                                                                                               | Not applicable |
| <b>Discussion</b>        |     |                                                                                                                                                                                                              |                |
| Key results              | 18  | Summarise key results with reference to study objectives                                                                                                                                                     | 11             |
| Limitations              | 19  | Discuss limitations of the study, taking into account sources of potential bias or imprecision. Discuss both direction and magnitude of any potential bias                                                   | 13             |
| Interpretation           | 20  | Give a cautious overall interpretation of results considering objectives, limitations, multiplicity of analyses, results from similar studies, and other relevant evidence                                   | 11-14          |
| Generalisability         | 21  | Discuss the generalisability (external validity) of the study results                                                                                                                                        | 13-14          |
| <b>Other information</b> |     |                                                                                                                                                                                                              |                |
| Funding                  | 22  | Give the source of funding and the role of the funders for the present study and, if applicable, for the original study on which the present article is based                                                | 14             |

\*Give information separately for cases and controls in case-control studies and, if applicable, for exposed and unexposed groups in cohort and cross-sectional studies.

**Note:** An Explanation and Elaboration article discusses each checklist item and gives methodological background and published examples of transparent reporting. The STROBE checklist is best used in conjunction with this article (freely available on the Web sites of PLoS Medicine at <http://www.plosmedicine.org/>, Annals of Internal Medicine at <http://www.annals.org/>, and Epidemiology at <http://www.epidem.com/>). Information on the STROBE Initiative is available at [www.strobe-statement.org](http://www.strobe-statement.org).
